# Supplementary material for: Characteristics of patients included and enrolled in studies on the prognostic value of serum biomarkers for prediction of postconcussion symptoms following a mild traumatic brain injury: a systematic review
Source: PubMed Central journal article supplement — BMJ Open. 2017 Sep 27;7(9):e017848. doi: 10.1136/bmjopen-2017-017848 (PMC5623519; doi:10.1136/bmjopen-2017-017848), 2017-09-27
Supplement: bmjopen-2017-017848.draft_revisions.pdf [file bmjopen-2017-017848.draft_revisions.pdf]

# BMJ Open

BMJ Open is committed to open peer review. As part of this commitment we make the peer review history of every article we publish publicly available.

When an article is published we post the peer reviewers' comments and the authors' responses online. We also post the versions of the paper that were used during peer review. These are the versions that the peer review comments apply to.

The versions of the paper that follow are the versions that were submitted during the peer review process. They are not the versions of record or the final published versions. They should not be cited or distributed as the published version of this manuscript.

BMJ Open is an open access journal and the full, final, typeset and author-corrected version of record of the manuscript is available on our site with no access controls, subscription charges or pay-per-view fees (<http://bmjopen.bmj.com>).

If you have any questions on BMJ Open's open peer review process please email [editorial.bmjopen@bmj.com](mailto:editorial.bmjopen@bmj.com)

# BMJ Open

## Characteristics of patients included and enrolled in studies on the prognostic value of serum biomarkers for prediction of post-concussion symptoms following a mild traumatic brain injury: A systematic review

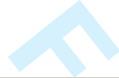

|                                 |                                                                                                                                                                                                                                                                                                                                                                                                                                                                                                                                                                                                                                                                                                                                                                                                                                                                                                                                                                                                                                                                                                                                                                                                                                                                                                                                                                                                                                                                                                                                                                                                                                                                                                                   |
|---------------------------------|-------------------------------------------------------------------------------------------------------------------------------------------------------------------------------------------------------------------------------------------------------------------------------------------------------------------------------------------------------------------------------------------------------------------------------------------------------------------------------------------------------------------------------------------------------------------------------------------------------------------------------------------------------------------------------------------------------------------------------------------------------------------------------------------------------------------------------------------------------------------------------------------------------------------------------------------------------------------------------------------------------------------------------------------------------------------------------------------------------------------------------------------------------------------------------------------------------------------------------------------------------------------------------------------------------------------------------------------------------------------------------------------------------------------------------------------------------------------------------------------------------------------------------------------------------------------------------------------------------------------------------------------------------------------------------------------------------------------|
| Journal:                        | <i>BMJ Open</i>                                                                                                                                                                                                                                                                                                                                                                                                                                                                                                                                                                                                                                                                                                                                                                                                                                                                                                                                                                                                                                                                                                                                                                                                                                                                                                                                                                                                                                                                                                                                                                                                                                                                                                   |
| Manuscript ID                   | bmjopen-2017-017848                                                                                                                                                                                                                                                                                                                                                                                                                                                                                                                                                                                                                                                                                                                                                                                                                                                                                                                                                                                                                                                                                                                                                                                                                                                                                                                                                                                                                                                                                                                                                                                                                                                                                               |
| Article Type:                   | Research                                                                                                                                                                                                                                                                                                                                                                                                                                                                                                                                                                                                                                                                                                                                                                                                                                                                                                                                                                                                                                                                                                                                                                                                                                                                                                                                                                                                                                                                                                                                                                                                                                                                                                          |
| Date Submitted by the Author:   | 23-May-2017                                                                                                                                                                                                                                                                                                                                                                                                                                                                                                                                                                                                                                                                                                                                                                                                                                                                                                                                                                                                                                                                                                                                                                                                                                                                                                                                                                                                                                                                                                                                                                                                                                                                                                       |
| Complete List of Authors:       | <p>Mercier, Eric; Axe Santé des Populations et Pratiques Optimales en Santé, Unité de recherche en Traumatologie - Urgence - Soins Intensifs, Centre de recherche du CHU de Québec, Université Laval; Département de Médecine Familiale et Médecine d'Urgence, Faculté de Médecine, Université Laval</p> <p>Tardif, Pier-Alexandre; Axe Santé des Populations et Pratiques Optimales en Santé, Unité de recherche en Traumatologie - Urgence - Soins Intensifs, Centre de recherche du CHU de Québec, Université Laval</p> <p>Emond, Marcel; Département de Médecine Familiale et Médecine d'Urgence, Faculté de Médecine, Université Laval; Axe Santé des Populations et Pratiques Optimales en Santé, Unité de recherche en Vieillesse, Centre de recherche du CHU de Québec, Université Laval</p> <p>Ouellet, Marie-Christine; Centre Interdisciplinaire de Recherche en Réadaptation et Intégration Sociale (CIRRIS)</p> <p>De Guise, Éline; Research-Institute, McGill University Health Centre; Centre de recherche interdisciplinaire en réadaptation du Montréal métropolitain (CRIR)</p> <p>Mitra, Biswadev; Emergency and Trauma Centre, The Alfred Hospital, Alfred Health; School of Public Health and Preventive Medicine, Monash University</p> <p>Cameron, Peter; Emergency and Trauma Centre, The Alfred Hospital, Alfred Health; School of Public Health and Preventive Medicine</p> <p>Le Sage, Natalie; Axe Santé des Populations et Pratiques Optimales en Santé, Unité de recherche en Traumatologie - Urgence - Soins Intensifs, Centre de recherche du CHU de Québec, Université Laval; Département de Médecine Familiale et Médecine d'Urgence, Faculté de Médecine, Université Laval</p> |
| <b>Primary Subject Heading</b>: | Epidemiology                                                                                                                                                                                                                                                                                                                                                                                                                                                                                                                                                                                                                                                                                                                                                                                                                                                                                                                                                                                                                                                                                                                                                                                                                                                                                                                                                                                                                                                                                                                                                                                                                                                                                                      |
| Secondary Subject Heading:      | Diagnostics, Emergency medicine                                                                                                                                                                                                                                                                                                                                                                                                                                                                                                                                                                                                                                                                                                                                                                                                                                                                                                                                                                                                                                                                                                                                                                                                                                                                                                                                                                                                                                                                                                                                                                                                                                                                                   |
| Keywords:                       | Traumatic brain injury, post-concussion symptoms, post-concussion syndrome, biomarkers, systematic review                                                                                                                                                                                                                                                                                                                                                                                                                                                                                                                                                                                                                                                                                                                                                                                                                                                                                                                                                                                                                                                                                                                                                                                                                                                                                                                                                                                                                                                                                                                                                                                                         |
|                                 |                                                                                                                                                                                                                                                                                                                                                                                                                                                                                                                                                                                                                                                                                                                                                                                                                                                                                                                                                                                                                                                                                                                                                                                                                                                                                                                                                                                                                                                                                                                                                                                                                                                                                                                   |

1  
2  
3  
4  
5  
6  
7  
8  
9  
10  
11  
12  
13  
14  
15  
16  
17  
18  
19  
20  
21  
22  
23  
24  
25  
26  
27  
28  
29  
30  
31  
32  
33  
34  
35  
36  
37  
38  
39  
40  
41  
42  
43  
44  
45  
46  
47  
48  
49  
50  
51  
52  
53  
54  
55  
56  
57  
58  
59  
60

SCHOLARONE™  
Manuscripts

For peer review only

**Title**

Characteristics of patients included and enrolled in studies on the prognostic value of serum biomarkers for prediction of post-concussion symptoms following a mild traumatic brain injury: A systematic review

**Authors**

Eric Mercier<sup>1, 2, 3, 4</sup>

Pier-Alexandre Tardif<sup>1</sup>

Marcel Emond<sup>2, 6</sup>

Marie-Christine Ouellet<sup>7</sup>

Élaine de Guise<sup>8,9</sup>

Biswadev Mitra<sup>3, 4, 5</sup>

Peter A. Cameron<sup>3, 4, 5</sup>

Natalie Le Sage<sup>1, 2</sup>

**Affiliations**

1. Axe Santé des Populations et Pratiques Optimales en Santé, Unité de recherche en Traumatologie - Urgence - Soins Intensifs, Centre de recherche du CHU de Québec, Université Laval, Québec, Canada

2. Département de Médecine Familiale et Médecine d'Urgence, Faculté de Médecine, Université Laval, Québec, Canada

3. Emergency and Trauma Centre, The Alfred Hospital, Alfred Health, Australia

4. School of Public Health and Preventive Medicine, Monash University, Australia

5. National Trauma Research Institute, The Alfred Hospital, Melbourne, VIC, Australia

6. Axe Santé des Populations et Pratiques Optimales en Santé, Unité de recherche en Vieillesse, Centre de recherche du CHU de Québec, Université Laval, Québec, Canada

7. Centre Interdisciplinaire de Recherche en Réadaptation et Intégration Sociale (CIRRIS), Québec, Québec, Canada

8. Research-Institute, McGill University Health Centre, Montreal, Quebec, Canada

9. Centre de recherche interdisciplinaire en réadaptation du Montréal métropolitain (CRIR), Montréal, Québec, Canada.

**Correspondence to**

Eric Mercier

Université Laval

1  
2  
3  
4  
5  
6  
7  
8  
9  
10  
11  
12  
13  
14  
15  
16  
17  
18  
19  
20  
21  
22  
23  
24  
25  
26  
27  
28  
29  
30  
31  
32  
33  
34  
35  
36  
37  
38  
39  
40  
41  
42  
43  
44  
45  
46  
47  
48  
49  
50  
51  
52  
53  
54  
55  
56  
57  
58  
59  
60

Centre de recherche du CHU de Québec  
1401, 18<sup>e</sup> rue, Québec, QC, Canada, G1J 1Z4  
Telephone number: 418-649-0252 ext. 65277  
Fax number: 418-649-5975  
Eric.mercier.2@ulaval.ca

For peer review only

## ABSTRACT

**Objective:** Mild traumatic brain injury (mTBI) has been insufficiently researched and its definition remains elusive. Investigators are confronted by heterogeneity in patients, mechanism of injury and outcomes. Findings are thus often limited in generalizability and clinical application. A systematic review was performed to describe the adult populations included and enrolled in studies that evaluated the prognostic value of biomarkers to predict post-concussion symptoms following a mTBI. **Data sources:** Searches of MEDLINE, EMBASE, CENTRAL, CINAHL, Web of Knowledge, PsycBITE, and PsycINFO up to October 2016. **Data selection and extraction:** Two reviewers independently screened for potentially eligible studies, extracted data and assessed the overall quality of evidence by outcome using the Grading of Recommendations Assessment, Development and Evaluation approach. **Results:** A total of 23,298 citations were obtained from which 166 manuscripts were reviewed. Thirty-six cohort studies (2,812 patients) having enrolled between 7 and 311 patients (median 89) fulfilled our inclusion criteria. Most studies excluded patients based on advanced age (n=10 (28%)), neurologic disorders (n=20 (56%)), psychiatric disorders (n=17 (47%)), substance abuse disorders (n=13 (36%)) or previous TBI (n=10 (28%)). Twenty-one studies (58%) used at least two of these exclusion criteria. The pooled mean age of included patients was 39.3 (SD 4.6) years old (34 studies). The criteria used to define a mTBI were inconsistent. The most frequently reported outcome was post-concussion syndrome (PCS) using the Rivermead Post-Concussion Symptoms Questionnaire (n=18 (50%)) with follow-ups ranging from 7 days to 5 years after the mTBI. **Conclusions:** Most studies have recruited samples that are not representative and generalizable to the mTBI population. These exclusion criteria limit the potential use and translation of promising serum biomarkers to predict post-concussion symptoms.

### Strengths and limitations of this study

- This systematic review and meta-analysis on the characteristics of patients included and enrolled in studies on the prognostic value of biomarkers for prediction of post-concussion symptoms reports important findings for researchers planning their study and for clinicians interpreting the available data.
- Strengths of this systematic review include the exhaustive search strategy performed using seven databases, the selection and data extraction conducted independently by two researchers and the registration beforehand in the Prospero database of the study protocol.
- This study is limited by the quality of the included studies as well as the unavailability of some relevant data such as some studies inclusion criteria, exclusion criteria and clear patient demographic data.

## INTRODUCTION

Mild traumatic brain injury (mTBI) is frequently encountered by neurologists, primary care, emergency, sport medicine and rehabilitation health providers<sup>1</sup> and accounts for approximately 80% of all TBI.<sup>2</sup> The incidence of mTBI exceeds that of dementia, epilepsy and stroke, giving it the status of the most common brain disorder.<sup>3</sup> However, there is still an incomplete understanding of mTBI pathophysiology that leads to suboptimal diagnosis, treatment and prognostication.<sup>4</sup> With increasing attendance to Emergency Departments (ED) following mTBI by complex patients such as elderly,<sup>5</sup> intoxicated patients<sup>6,7</sup> and patients with psychiatric disorders,<sup>8</sup> there is an urgent need to optimise the care of mTBI patients.

Once considered benign, there has been increased awareness of the potential adverse consequences of mTBI.<sup>9</sup> While 80% of patients will report at least one early post-concussion symptom,<sup>10</sup> between 10% and 56% will exhibit persistent symptoms 3 months after a mTBI.<sup>11-15</sup> Physical, cognitive, and emotional symptoms, often described as post-concussion syndrome (PCS), that exceed the expected window of recovery have deleterious impacts on quality of life and daily functional outcome.<sup>16-18</sup> Prognostic markers have been highlighted for cognitive, psychiatric, and mortality outcomes.<sup>19</sup> However, the authors acknowledged that evidence regarding psychiatric and mortality outcomes is limited, and that little evidence exist concerning the role of biological markers in predicting the persistence of cognitive impairment after mTBI.<sup>19</sup> Under these conditions, there is still a need to develop objective assessment and prognostication tools. Novel brain specific serum biomarkers have been studied to assist the prognostic evaluation after mTBI but the translation of biomarker research into clinical practice is still pending.

Unfortunately, research in mTBI is beset with methodological challenges. Researchers are confronted with substantial heterogeneity of patients, various mechanisms of injury and a wide range of potential outcomes.<sup>20,21</sup> Therefore, many researchers choose to apply strict inclusion and exclusion criteria to minimize confounding by such factors and to decrease the inherent population heterogeneity.<sup>20</sup> This approach results in improved internal validity but also inevitably limits recruitment and generalizability of results. Some populations are therefore often excluded or less likely to be enrolled in TBI studies.<sup>22</sup> Furthermore, many methodological concerns regarding mTBI studies such as the inconsistency in mTBI definitions and the frequent inadequacy of outcome measures were highlighted in the recent synthesis performed by the International Collaboration on mTBI prognosis.<sup>23</sup> All these methodological issues further limit the translation to bedside care and might be applicable to research in the field of brain specific biomarkers following a mTBI. Identifying which patients are not enrolled and how often they are excluded from these studies will allow to underline the generalisability of this literature and highlight gaps that future researches should aim to fill.

This systematic review aims to describe populations included or enrolled in studies on the prognostic value of biomarkers for prediction of post-concussion symptoms following a mTBI. The secondary objectives are to describe the mTBI definition applied in these studies as well as the outcomes evaluated.

## METHODS

### Search strategy

1  
2  
3 A systematic review was performed to determine the prognostic value of biomarkers to predict the  
4 occurrence of post-concussion symptoms following a mTBI (International Prospective Register of  
5 Systematic Reviews (PROSPERO) registration CRD42016032578). In summary, a general  
6 search strategy aiming to identify articles which assessed the association between biomarkers  
7 and post-concussion symptoms in TBI was created for seven databases (from their inception to  
8 October 4, 2016): MEDLINE, EMBASE, CINAHL, Cochrane Central Register of Controlled Trials,  
9 Web of Knowledge, PsycBITE and PsycINFO using MeSH terms, Emtree terms and keywords  
10 for their respective database. This research used a general strategy with an additional focus on  
11 seven of the most studied and promising biomarkers (S-100 $\beta$  protein, neuron-specific enolase  
12 (NSE), glial fibrillary acidic protein (GFAP), ubiquitin carboxy-terminal hydrolase L1 (UCHL-1),  
13 cleaved tau (c-tau), microRNA, and brain-derived neurotrophic factor (BDNF)).<sup>24-28</sup> No language,  
14 type of study or date restriction were applied in the initial search strategy. The detailed EMBASE  
15 search strategy is available in Appendix 1. References from the included studies and narrative  
16 reviews were also scrutinized and relevant abstracts from congress and conferences were  
17 reviewed to identify potential peer-reviewed published studies. (Appendix 2) Authors of potentially  
18 relevant abstracts were contacted to identify potentially published studies not identified with our  
19 search strategies.  
20  
21

## 22 23 24 **Study selection**

25  
26 Using EndNote (Thomson Reuters, version X7), all the citations obtained with our search  
27 strategies on the seven databases were combined. Duplicates were removed. Independently, two  
28 reviewers (EM, PAT) then scrutinized all citations and consecutively excluded studies using the  
29 title and abstract. Manuscripts of all potentially included studies were obtained. Studies in other  
30 language than English or French were translated into English. A third researcher (NL) was  
31 involved in case of disagreement and was responsible for the final decision regarding the  
32 inclusion of a study.  
33

34  
35 Studies were considered eligible for inclusion when they reported the association between at  
36 least one serum biomarker level and at least one post-concussion symptom evaluated  $\geq 7$  days  
37 following a mTBI. This delay was chosen to ensure that the outcomes represented a prognostic  
38 measure instead of a diagnostic evaluation. This study was limited to the adult ( $> 16$  years old)  
39 population. Studies were excluded if they were animal studies, case-report, specific to a  
40 paediatric population, reporting on moderate or severe TBI unless specific data for mTBI patients  
41 could be extracted from the manuscript or by contacting the authors, post-concussion symptom  
42 evaluation was performed less  $< 7$  days after the mTBI or the study was not published in a peer-  
43 reviewed journal.  
44

## 45 46 **Data extraction**

47  
48 Using a data collection form, two reviewers (EM, PAT) independently collected the relevant data  
49 from every included study. Therefore, data on the manuscript (journal, publication date, authors),  
50 study characteristics (period and methods of recruitment, country(ies), type of study, number of  
51 patients included and followed, number of hospitals involved, setting, inclusion and exclusion  
52 criteria, mTBI definition), biomarker (assays used and characteristics, detection limits, thresholds,  
53 timing of sampling, type of sampling (venous, capillary or arterial), number of samples), patient  
54 characteristics (age, gender, trauma mechanism, TBI severity) and the outcomes (outcome type,  
55 assessment timing, method of outcome assessment) were collected. When clarification or  
56  
57  
58  
59  
60



1  
2  
3 additional information was needed, the corresponding author of the included study was contacted  
4 via email (up to three attempts).  
5  
6  
7

## 8 9 **Statistical analysis and quality assessment**

10  
11 Descriptive statistics were used to describe the population included and enrolled in the studies.  
12 Measures of central tendency (means and medians) and dispersion (standard deviation (SD))  
13 were calculated using Statistical Analysis System software (SAS Institute, Cary, North Carolina, v.  
14 9.4). Main data are also presented as proportions. In 14 studies where sufficient data was  
15 available, we calculated the pooled mean age of enrolled patients and its heterogeneity ( $I^2$ ).<sup>29</sup> To  
16 be more inclusive, a pooled mean age was also calculated using a weighted average based on  
17 study sample size for 34 studies. Where possible, age mean and SD were estimated using  
18 formulae proposed by Hozo et al.<sup>30</sup>  
19

20  
21 The quality of the evidence of the three main outcomes was evaluated using the GRADE  
22 approach (post-concussion symptoms, GOS-E & GOS and return to work)<sup>31</sup>. Given the high  
23 heterogeneity of the outcomes evaluated and the scales used, no quality of evidence assessment  
24 was performed for the neuropsychological outcomes. This study is reported in accordance with  
25 the Preferred Reporting Items for Systematic Reviews and Meta-Analyses (PRISMA) Statement  
26 (see Appendix 3).<sup>32</sup>  
27  
28

## 29 30 **RESULTS**

### 31 32 **Characteristics of the included studies**

33 After removal of duplicates, the search strategy yielded 23,298 unique citations. Following the  
34 assessment of titles and abstracts using our inclusion and exclusion criteria, a total of 166  
35 manuscripts were reviewed (Figure 1). Thirty-six manuscripts fulfilled our criteria and were  
36 included in the present study (Table 1). Only one disagreement between the reviewers required  
37 the third researcher (NL) to make the final decision. A total of 2,812 patients were included in  
38 those studies, which individually included from seven to 311 patients (mean 104 (SD 62), median  
39 89). Twenty-one studies were conducted in Europe while eight were from North America, six from  
40 Asia and one was from South America. Two studies were in German and were fully translated in  
41 English. Only eight studies (22%) evaluated patients from multiple centres. The most frequent  
42 biomarker studied was the S-100 $\beta$  protein (29 studies) followed by NSE (10 studies), C-tau (four  
43 studies), GFAP (four studies), UCHL-1 (three studies), BDNF (one study) and microRNA (one  
44 study).  
45  
46

### 47 48 **Inclusion and exclusion criteria in the included studies**

49 Age limits criteria and the age of the patients enrolled in the studies are illustrated in the eFigure  
50 1. Regarding the inclusion criteria, an upper age limit was used in 10 studies (28%). Therefore,  
51 patients  $\geq 65$  years old were excluded in seven studies (19%) while those aged  $\geq 85$  years old  
52 were excluded in three more studies (total 10 studies, 28%). Across studies, the oldest patient  
53 enrolled ranged from 40 to 94 years old. The pooled mean age in the 14 studies with data on SD  
54 was 38.7 (SD 5.3) years old (18 studies) and was highly heterogeneous ( $I^2$  97%). In 34 studies,  
55 the pooled mean age was 39.3 (SD 4.6) years old.  
56  
57  
58  
59  
60

1  
2  
3 The most frequent exclusion criteria were neurologic disorders, psychiatric disorders, trauma to  
4 another body region, substance abuse disorders and previous TBI (Table 2). Twenty-one studies  
5 (58%) used at least two of these exclusion criteria. Medical comorbidities were infrequently used  
6 as exclusion criteria. Ten studies (28%) did not report any exclusion criteria and were therefore  
7 considered as having no exclusion criteria.  
8

### 9 10 **Mild traumatic brain injury definitions in the included studies**

11 The mTBI definitions used were not standardised (Table 3). The Glasgow Coma Scale (GCS)  
12 was a criterion in 31 studies (86%) using either GCS 13-15 (23 studies (64%)), GCS 14-15  
13 (seven studies (19%)) or GCS 15 only (one study (3%)). Other criteria such as loss of  
14 consciousness (LOC), post-traumatic amnesia (PTA) and focal neurologic deficit were  
15 inconsistently used to define mTBI. Three (8.3%), six (16.7%), and one (2.8%) studies used  
16 definitions promoted by the American College of Emergency Physician/Centers for Disease  
17 Control and Prevention,<sup>33</sup> the American Congress of Rehabilitation Medicine,<sup>34</sup> and the European  
18 Federation of Neurological Societies,<sup>35</sup> respectively.  
19

### 20 21 **Outcomes presented in the included studies**

22 Table 4 presents the outcomes evaluated. The most frequently evaluated outcome was post-  
23 concussion syndrome (PCS) in 18 studies (50%). The Rivermead Post-Concussion Symptoms  
24 Questionnaire was the most used scale. Table 5 presents the number of symptoms required to  
25 define the presence of a PCS in the different studies. The number of symptoms used to define a  
26 positive PCS ranged between one and five with only 10 studies (28%) using  $\geq 3$  criteria. Among  
27 the 36 studies, there were 48 outcome evaluations and the delay between the mTBI and the  
28 outcome assessment was  $> 3$  months in only 22 (46%) of them. Six studies used outcomes that  
29 were unlikely to detect subtle impairment after a mTBI such as the Glasgow Outcome Scale  
30 (GOS) or the GOS-Extended (GOS-E).<sup>36</sup>  
31

### 32 33 **Quality of the evidence**

34 Using the GRADE approach, the quality of evidence was evaluated as low or insufficient for the  
35 most frequently studied outcomes (Table 6). Various neuropsychological assessments were  
36 grouped together in Table 4 but given the heterogeneity of the neuropsychological tests used and  
37 the analytic methods, no GRADE assessment was performed for this outcome.  
38

## 39 40 **DISCUSSION**

41 Our systematic review highlights the selected patient populations in previously published reports.  
42 Most studies have restricted the inclusion of patients based on advanced age (28%), neurologic  
43 disorders (56%), psychiatric disorders (47%), substance abuse disorders (36%) or previous TBI  
44 (28%). The mean age of enrolled patients was only 38.7 years old. There are also important  
45 variations in the definitions of mTBI and in outcomes evaluated. The criteria used to define the  
46 occurrence of a positive PCS using the Rivermead Post-Concussion Symptoms Questionnaire  
47 ranged between one and five symptoms. These results impact on the generalizability and clinical  
48 applicability of the study findings on biomarkers and other prognostic tools following mTBI.  
49

50  
51 In comparison with moderate or severe TBI, mTBI remains relatively understudied and difficult to  
52 define through imaging and other investigative modalities.<sup>20 21 37</sup> Selection bias is common and  
53 strict enrolment criteria have been associated with exclusion of up to 95% of the general mTBI  
54 population.<sup>20 22</sup> Therefore, patients with pre-morbid conditions remain poorly studied despite their  
55 unfavourable prognosis and increased risk of disabilities.<sup>38 39</sup> The association between the  
56 biomarker and the outcome in patients with pre-morbid conditions might differ from the  
57 association with healthier patients therefore limiting the potential to draw clinical conclusions.  
58  
59  
60

1  
2  
3  
4 The epidemiology of TBI has evolved with increasing numbers of complex patients consulting for  
5 their injury, such as elderly<sup>40</sup> and patients with substance abuse, psychiatric or neurologic  
6 disorders.<sup>6 8</sup> Intoxicated patients also often present with altered conscious state raising the  
7 possibility of TBI and complicating initial clinical assessment.<sup>41 42</sup> Patients with previous TBI are  
8 also of concern given the complications of repetitive TBI.<sup>43</sup> All these patients pose a challenge to  
9 the clinician in terms of assessment of injury severity and prognosis. Moreover, these pre-injury  
10 factors are known to predispose to the development of persistent post-concussion symptoms  
11 leading to poorer functional outcomes.<sup>38 39 44-46</sup> In a large retrospective cohort study of patients  
12 with suspected TBI, the prevalence of these confounding factors was highlighted. Patients were  
13 frequently intoxicated with alcohol (20%) or had a psychiatric (25%) or neurologic disorders  
14 (25%).<sup>22</sup> Unfortunately, these same patients were frequently excluded from the studies included in  
15 our systematic review. Therefore, the study populations are often small non-representative  
16 subgroups of patients with fewer risk factors to develop post-concussion symptoms. Future  
17 studies should aim to maximize the recruitment of these clinically relevant patients.  
18  
19

20 Geriatric patients represent a constantly growing proportion of the trauma population as the world  
21 is ageing.<sup>47 48</sup> The absolute incidence of TBI among the geriatric patients is rising as a result of  
22 the increased life expectancy and mobility.<sup>5</sup> Advanced age was an exclusion criteria in 10 studies  
23 (28%) but the patients enrolled were mostly young with a mean age of only 38.7 (SD 5.3) years  
24 old. Recent large TBI epidemiologic studies<sup>49 50</sup> showed that more than 40% of the mTBI  
25 population are older than 50 years and the median age of patients is at least 44 years.<sup>5 51</sup>  
26 Geriatric patients seems therefore underrepresented in our included studies despite the fact that  
27 they have a poorer functional outcome with an increased occurrence of post-concussion  
28 symptoms.<sup>52</sup> The effect of age on the circulating blood-based biomarker is controversial.<sup>53</sup>  
29 Geriatric patients often have medical comorbidities that can potentially impact the biomarker's  
30 production, metabolism and clearance thus altering its baseline circulating serum level and its  
31 release following a mTBI. Interestingly, patients with renal impairment were excluded in only three  
32 studies (8%) even though medical comorbidities might represent a more robust exclusion criteria  
33 than age alone.  
34  
35

36 The definition of mTBI was widely variable between the studies often limiting the comparability of  
37 studies. While GCS was almost universally included as a criterion, other criteria such as PTA,  
38 LOC and neuroimaging results were inconsistently used. Mild TBI is a heterogeneous group with  
39 a wide range of "severity". The symptom-based GCS classification often fails to demonstrate the  
40 whole spectrum of severity. The diagnostic criteria can be unreliable and overlap many conditions  
41 such as dementia, delirium or intoxication and the presence of confounding factors during the  
42 initial assessment are frequent.<sup>8</sup>  
43  
44

45 One major limitation to our understanding of mTBI is the lack of universal definition of the  
46 outcomes evaluated.<sup>54</sup> Most patients recover completely but for those affected by persistent  
47 symptoms, there are controversies about the nomenclature and definitions associated with post-  
48 concussion symptoms and PCS.<sup>55</sup> This is particularly noticeable in our systematic review as the  
49 diagnosis criteria of PCS was highly variable ranging from one to more than five criteria on the  
50 Rivermead Post-Concussion Symptoms Questionnaire to determine the presence or the absence  
51 of PCS. The timing of outcome evaluation was also variable ranging from seven days to more  
52 than five years. PCS is a complex constellation of symptoms with a significant variability between  
53 individuals. Since most symptoms are subjective, there is a high risk of misdiagnosis<sup>56</sup> and we are  
54 still unable to predict the occurrence of PCS. Biomarkers are promising to help predict the  
55 recovery and the risk of persistent PCS but well-designed confirmatory studies that address the  
56 methodological limitations are needed to enhance our knowledge of mTBI consequences.<sup>19</sup> The  
57  
58  
59  
60

1  
2  
3 lack of standardisation in the definition of the outcomes undoubtedly contributes to impede the  
4 translation from research to daily bedside care in the field of brain specific biomarkers. Another  
5 shortcoming that might partly explain the difficulty of using serum biomarkers to predict post-  
6 concussion symptoms are that these symptoms are not specific to mild TBI and are prevalent  
7 both in the general population and after non-head injuries.<sup>57</sup>  
8

9  
10 There are numerous other potential benefits to study biomarkers after a mTBI.<sup>37</sup> In addition to  
11 improving the initial prognostication, the use of biomarkers could help making the diagnosis,  
12 determine more accurately the need for neuroimaging, evaluating the disease progression,  
13 determining the safe moment to return to sport or activities and might be used as a surrogate  
14 assessment tool for investigational treatments.<sup>26 27</sup> As mTBI diagnostic criteria are subjective,  
15 nonspecific and overlap other conditions, a biomarker level could alleviate the paucity around the  
16 initial presentation and represent an objective assessment tool.  
17

### 18 19 **Strengths and limitations**

20  
21 Our study has several limitations. We looked both at the characteristics of the inclusion/exclusion  
22 criteria and the patients enrolled. The absence of exclusion criteria does not mean that some  
23 subgroups of patient will be enrolled and often studies failed to present the number of patients  
24 screened and approached to be enrolled. Therefore, we can expect that our review  
25 underestimates the poor representation of subgroups such as patients with substance abuse,  
26 psychiatric and neurologic disorders. Ten studies did not report any exclusion criteria and were  
27 considered as having no exclusion criteria but this might be a misinterpretation thus making the  
28 underestimation even more likely. We have however used high methodological standards to  
29 perform our systematic review. We have completed an exhaustive unrestricted search strategy  
30 using seven databases and screened 23,298 citations. Studies were researched and data were  
31 extracted independently by two reviewers. This study is reported in accordance with the  
32 recommended PRISMA Statement.  
33  
34

### 35 36 **CONCLUSION**

37  
38 The patients included and enrolled in studies on the prognostic value of biomarkers following  
39 mTBI are not representative of the mTBI population. Subgroups such as elderly, patients with  
40 neurologic, psychiatric and substance abuse disorders and patients with previous TBI are often  
41 excluded and poorly represented even though they are at high risk of post-concussion symptoms  
42 and associated disabilities. The lack of standardisation of definitions further impedes the  
43 translation from research to everyday patient care. Broader inclusion criteria and standardised  
44 definitions, particularly mTBI and PCS, are required to maximise the generalizability and the  
45 translation to bedside care of the promising brain specific biomarkers.  
46  
47

48  
49 **Contributors** EM has had the original idea for this study. EM, PAT and NL conceived the study's  
50 design and protocol with support, input and oversight from ME, MCO, EDG, BM and PAC. EM  
51 and PAT elaborated the original database search strategy. EM and PAT performed the study  
52 selection and data extraction with oversight from ME, MCO, EDG, PAC and NL. PAT prepared  
53 the data for statistical analysis. Statistical analysis plan was elaborated by ME, BM and NL. EM  
54 and PAT wrote the manuscript first draft. All authors contributed to the manuscript revision and  
55 they all approved the final submitted version. All authors are accountable for all aspects of this  
56 study.  
57  
58

1  
2  
3  
4  
5  
6  
7  
8  
9  
10  
11  
12  
13  
14  
15  
16  
17  
18  
19  
20  
21  
22  
23  
24  
25  
26  
27  
28  
29  
30  
31  
32  
33  
34  
35  
36  
37  
38  
39  
40  
41  
42  
43  
44  
45  
46  
47  
48  
49  
50  
51  
52  
53  
54  
55  
56  
57  
58  
59  
60

**Funding** Natalie Le Sage has received a grant from le Fonds de Recherche du Québec – Santé (FRQ-S #30598, Consortium pour le développement de la recherche en traumatologie – Volet 4). Eric Mercier has obtained a fellowship in clinical research grant from FRQ-S (#32058).

**Competing interests** None declared.

**Data sharing statement:** No additional data are available.

For peer review only

## Tables

**Table 1.** Characteristics of included studies

| First author                   | Year of study publication | Countries               | Number of hospitals | Number of patients included | Biomarkers assessed      |
|--------------------------------|---------------------------|-------------------------|---------------------|-----------------------------|--------------------------|
| Ingebrigtsen <sup>58</sup>     | 1995                      | Norway                  | 1                   | 50                          | S-100 $\beta$            |
| Waterloo <sup>59</sup>         | 1997                      | Norway                  | 1                   | 7                           | S-100 $\beta$            |
| Ingebrigtsen <sup>60</sup>     | 1999                      | Norway                  | 1                   | 50                          | S-100 $\beta$            |
| Ingebrigtsen <sup>61</sup>     | 2000                      | Norway, Sweden, Denmark | 3                   | 182                         | S-100 $\beta$            |
| Herrmann <sup>62</sup>         | 2001                      | Germany                 | 1                   | 69                          | S-100 $\beta$ , NSE      |
| de Kruijk <sup>63</sup>        | 2002                      | Netherlands             | 1                   | 107                         | S-100 $\beta$ , NSE      |
| Townend <sup>64</sup>          | 2002                      | United Kingdom          | 4                   | 148                         | S-100 $\beta$            |
| de Kruijk <sup>65</sup>        | 2003                      | Netherlands             | 1                   | 111                         | S-100 $\beta$ , NSE      |
| Savola <sup>66</sup>           | 2003                      | Finland                 | 1                   | 199                         | S-100 $\beta$            |
| Stranjalis <sup>67</sup>       | 2004                      | Greece                  | 1                   | 100                         | S-100 $\beta$            |
| de Boussard <sup>68</sup>      | 2005                      | Sweden                  | 3                   | 122                         | S-100 $\beta$            |
| Stålnacke <sup>69</sup>        | 2005                      | Sweden                  | 1                   | 88                          | S-100 $\beta$ , NSE      |
| Stapert <sup>70</sup>          | 2005                      | Netherlands             | 1                   | 50                          | S-100 $\beta$            |
| Bazarian <sup>71</sup>         | 2006 (BI)                 | USA                     | 1                   | 35                          | S-100 $\beta$ , C-Tau    |
| Bazarian <sup>72</sup>         | 2006 (RNN)                | USA                     | 1                   | 96                          | S-100 $\beta$            |
| Bulut <sup>73</sup>            | 2006                      | Turkey                  | 1                   | 60                          | C-Tau                    |
| Naeimi <sup>74</sup>           | 2006                      | Austria                 | 1                   | 45                          | S-100 $\beta$ , NSE      |
| Sojka <sup>75</sup>            | 2006                      | Sweden                  | 1                   | 98                          | S-100 $\beta$ , NSE      |
| Jakola <sup>76</sup>           | 2007                      | Norway                  | 3                   | 89                          | S-100 $\beta$            |
| Stålnacke <sup>77</sup>        | 2007                      | Sweden                  | 1                   | 69                          | S-100 $\beta$ , NSE      |
| Lima <sup>78</sup>             | 2008                      | Brazil                  | 1                   | 50                          | S-100 $\beta$            |
| Ma <sup>79</sup>               | 2008                      | USA                     | 1                   | 50                          | C-Tau                    |
| Schütze <sup>80</sup>          | 2008                      | Germany                 | 1                   | 74                          | S-100 $\beta$ , NSE      |
| Müller <sup>81</sup>           | 2009                      | Norway                  | 1                   | 93                          | S-100 $\beta$            |
| Kleinert <sup>82</sup>         | 2010                      | Germany                 | 1                   | 73                          | S-100 $\beta$            |
| Meric <sup>83</sup>            | 2010                      | Turkey                  | 1                   | 80                          | NSE                      |
| Topolovec-Vranic <sup>84</sup> | 2011                      | Canada                  | 1                   | 141                         | S-100 $\beta$ , NSE      |
| Metting <sup>85</sup>          | 2012                      | Netherlands             | 1                   | 94                          | S-100 $\beta$ , GFAP     |
| Okonkwo <sup>86</sup>          | 2013                      | USA                     | 3                   | 215                         | GFAP                     |
| Abbasi <sup>87</sup>           | 2014                      | Iran                    | 2                   | 109                         | S-100 $\beta$            |
| Diaz-Arrastia <sup>88</sup>    | 2014                      | USA                     | 3                   | 206                         | GFAP, UCHL-1             |
| Ryb <sup>89</sup>              | 2014                      | USA                     | 1                   | 150                         | S-100 $\beta$            |
| Heidari <sup>90</sup>          | 2015                      | Iran                    | 1                   | 176                         | S-100 $\beta$            |
| Dey <sup>91</sup>              | 2016                      | India                   | 1                   | 20                          | S-100 $\beta$ , UCHL-1   |
| Korley <sup>28</sup>           | 2016                      | USA                     | 2                   | 311                         | C-Tau, GFAP, UCHL-1      |
| Yang <sup>92</sup>             | 2016                      | China                   | 1                   | 76                          | miR-93, miR-191, miR-499 |

BI: Brain Injury; C-Tau: cleaved tau; BDNF: brain-derived neurotrophic factor; GFAP: glial fibrillary acidic protein; miR: micro ribonucleic acid; NSE: neuron specific enolase; RNN: Restorative Neurology and Neuroscience; UCHL-1: ubiquitin carboxy-terminal hydrolase L1; USA: United States of America.

**Table 2.** Exclusion criteria used in the included studies

| Exclusion criteria                                      | Number of studies (n, %) |
|---------------------------------------------------------|--------------------------|
| Neurologic disorder                                     | 20 (55.6)                |
| Psychiatric disorder                                    | 17 (47.2)                |
| Significant trauma to another body region than the head | 17 (47.2)                |
| Substance abuse (drug or alcohol)                       | 14 (38.8)                |
| Previous traumatic brain injury                         | 10 (27.8)                |
| Alcohol intoxication                                    | 9 (25)                   |
| Renal impairment                                        | 3 (8.3)                  |
| Cardiac disease                                         | 2 (5.6)                  |

For peer review only

**Table 3.** Criteria used to define mild traumatic brain injury (mTBI) in the included studies

| Criteria                                                                                     |               | Number of studies (n, %) |
|----------------------------------------------------------------------------------------------|---------------|--------------------------|
| Glasgow Coma Scale (GCS)                                                                     | 13-15         | 23 <sup>§</sup> (63.8)   |
|                                                                                              | 14-15         | 7 (19.4)                 |
|                                                                                              | 15            | 1 (2.8)                  |
|                                                                                              | NR            | 5 <sup>°</sup> (13.9)    |
| Loss of consciousness (LOC)                                                                  | < 10 minutes  | 4 (11.1)                 |
|                                                                                              | < 15 minutes  | 5 (13.9)                 |
|                                                                                              | < 30 minutes  | 9 <sup>§</sup> (25)      |
|                                                                                              | No duration   | 8 <sup>°</sup> (22.2)    |
|                                                                                              | No use of LOC | 10 (27.8)                |
| Post-traumatic amnesia (PTA)                                                                 | < 15 minutes  | 1 (2.8)                  |
|                                                                                              | < 30 minutes  | 0 (0)                    |
|                                                                                              | < 60 minutes  | 4 <sup>§</sup> (11.1)    |
|                                                                                              | < 24 hours    | 3 (8.3)                  |
|                                                                                              | No duration   | 7 <sup>°</sup> (19.4)    |
|                                                                                              | No use of PTA | 21 (58.3)                |
| Initial altered mental state                                                                 | Yes           | 3 (8.3)                  |
| Absence of focal neurology deficit                                                           | Yes           | 14 (38.9)                |
| Triaged to non-contrast head CT using the (ACEP/CDC) evidence-based joint practice guideline |               | 3 <sup>°</sup> (8.3)     |
| Use of the American Congress of Rehabilitation Medicine definition (1993)                    |               | 6 (16.7)                 |
| Use of European Federation of Neurological Societies (EFNS) definition (2002)                |               | 1 <sup>§</sup> (2.8)     |

\* ACEP: American College of Emergency Physicians; CDC: Centre for Disease Control; CT: Computed Tomography; TBI: Traumatic Brain Injury.

<sup>§</sup> Heidari et al. (2015)<sup>90</sup> used the following mTBI definition: (1) a GCS score of 13–14; (2) a GCS score of 15 with loss of consciousness (LOC) < 30 minutes, post-traumatic amnesia (PTA) < 1 hour; or (3) a GCS score of 15 without LOC or PTA.

<sup>°</sup> Korley et al. (2016)<sup>28</sup> presented 3 different cohorts with different inclusion criteria. Only the mTBI definition of the case cohort is presented in the table.



**Table 4.** Outcome evaluated in the included studies

| <b>Outcome evaluated</b>                     | <b>Number of studies (n, %)</b>               |
|----------------------------------------------|-----------------------------------------------|
| Post-concussion syndrome                     | 18 (50)                                       |
| Neuropsychological evaluation                | 9 (25)                                        |
| GOS-E; GOS                                   | 5 (13.8); 4 (11.1)                            |
| Return to work                               | 4 (11.1)                                      |
| Headache                                     | 3 (8.3)                                       |
| Life satisfaction                            | 2 (5.6)                                       |
| RHFUQ                                        | 2 (5.6)                                       |
| Anxiety or depression                        | 1 (2.7)                                       |
| Daily activity functioning                   | 1 (2.7)                                       |
| Olfactory function                           | 1 (2.7)                                       |
| Post-traumatic related stress                | 1 (2.7)                                       |
| Quality of life                              | 1 (2.7)                                       |
| SF-36                                        | 1 (2.7)                                       |
| <b>Delay of outcome assessment after TBI</b> | <b>Assessments<br/>(n=48 outcomes) (n, %)</b> |
| 7 days                                       | 3 (6.3)                                       |
| 14 days                                      | 6 (12.5)                                      |
| 1 month                                      | 6 (12.5)                                      |
| 1.1-3 months                                 | 11 (23)                                       |
| 3.1-6 months                                 | 11 (23)                                       |
| 6.1-12 months                                | 6 (12.5)                                      |
| 12.1-18 months                               | 4 (8.2)                                       |
| > 18.1 months                                | 1 (2)                                         |

GOS: Glasgow Outcome Scale; GOS-E: Glasgow Outcome Scale-Extended; RHFUQ: Rivermead Head Injury Follow-up Questionnaire; SF-36: Acute Medical Outcomes F6-36v2 Health Survey; TBI: traumatic brain injury.

**Table 5.** Definition of post-concussion syndrome (PCS)

| Scale used                                       | Number of positive symptoms to define the presence of a PCS | Number of studies (n, %) |
|--------------------------------------------------|-------------------------------------------------------------|--------------------------|
| Rivermead Post-Concussion Symptoms Questionnaire | $\geq 1$                                                    | 3 (17)                   |
|                                                  | $\geq 2$                                                    | 1 (5.5)                  |
|                                                  | $\geq 3$                                                    | 5 (28)                   |
|                                                  | $\geq 4$                                                    | 1 (5.5)                  |
|                                                  | $\geq 5$                                                    | 2 (11)                   |
|                                                  | Not specified                                               | 6 (33)                   |

For peer review only

**Table 6.** Outcomes quality of evidence according to the Grades of Recommendation, Assessment, Development, and Evaluation (GRADE) approach

| Outcomes                        | Number of studies (number of patients) | Design        | Findings and direction                                                                                                                                                                                                                                                                                               | GRADE        |
|---------------------------------|----------------------------------------|---------------|----------------------------------------------------------------------------------------------------------------------------------------------------------------------------------------------------------------------------------------------------------------------------------------------------------------------|--------------|
| <b>Post-concussion symptoms</b> | 18 studies (n=2048)                    | Observational | Important heterogeneity in populations enrolled, definitions of outcome variables, and evaluation delay. Only four associations between post-concussion symptoms and a biomarker were statistically significant. Only eight studies used multivariate regression analyses and confidence intervals were often large. | Low          |
| <b>GOS-E &amp; GOS</b>          | 9 studies (n=1235)                     | Observational | Slight discrepancies in definitions, wide differences in populations enrolled, methods quality as well as in evaluation delay, and inconsistencies in associations (only 3 were significant), their direction and strength.                                                                                          | Insufficient |
| <b>Return to work</b>           | 4 studies (n=432)                      | Observational | Slight discrepancies in definitions and reporting but considerable differences in evaluation delay (one week to one year). Only one study showed a significant association with increased S-100 $\beta$ protein serum level.                                                                                         | Insufficient |

GOS: Glasgow Outcome Scale; GOS-E: Glasgow Outcome Scale (GOS) Extended

## REFERENCES

1. Langlois JA, Marr A, Mitchko J, et al. Tracking the silent epidemic and educating the public: CDC's traumatic brain injury-associated activities under the TBI Act of 1996 and the Children's Health Act of 2000. *The Journal of head trauma rehabilitation* 2005;20(3):196-204. [published Online First: 2005/05/24]
2. Ruff R. Two decades of advances in understanding of mild traumatic brain injury. *The Journal of head trauma rehabilitation* 2005;20(1):5-18. doi: 00001199-200501000-00003 [pii] [published Online First: 2005/01/26]
3. Mondello S, Schmid K, Berger RP, et al. The challenge of mild traumatic brain injury: role of biochemical markers in diagnosis of brain damage. *Medicinal research reviews* 2014;34(3):503-31. doi: 10.1002/med.21295 [published Online First: 2013/07/03]
4. Katz DI, Cohen SI, Alexander MP. Mild traumatic brain injury. *Handb Clin Neurol* 2015;127:131-56. doi: 10.1016/B978-0-444-52892-6.00009-X
5. Roozenbeek B, Maas AI, Menon DK. Changing patterns in the epidemiology of traumatic brain injury. *Nature reviews Neurology* 2013;9(4):231-6. doi: 10.1038/nrneurol.2013.22 [published Online First: 2013/02/28]
6. Brennan JH, Bernard S, Cameron PA, et al. Ethanol and isolated traumatic brain injury. *Journal of clinical neuroscience : official journal of the Neurosurgical Society of Australasia* 2015;22(9):1375-81. doi: 10.1016/j.jocn.2015.02.030 [published Online First: 2015/06/13]
7. Hamilton BH, Sheth A, McCormack RT, et al. Imaging of frequent emergency department users with alcohol use disorders. *J Emerg Med* 2014;46(4):582-7. doi: 10.1016/j.jemermed.2013.08.129
8. Furger RE, Nelson LD, Brooke Lerner E, et al. Frequency of Factors that Complicate the Identification of Mild Traumatic Brain Injury in Level I Trauma Center Patients. *Concussion* 2016;1(2) doi: 10.2217/cnc.15.11
9. McMillan TM, McSkimming P, Wainman-Lefley J, et al. Long-term health outcomes after exposure to repeated concussion in elite level: rugby union players. *Journal of Neurology, Neurosurgery & Psychiatry* 2016
10. Boake C, McCauley SR, Levin HS, et al. Diagnostic criteria for postconcussional syndrome after mild to moderate traumatic brain injury. *The Journal of neuropsychiatry and clinical neurosciences* 2005;17(3):350-6. doi: 10.1176/jnp.17.3.350 [published Online First: 2005/09/24]
11. Kashluba S, Paniak C, Blake T, et al. A longitudinal, controlled study of patient complaints following treated mild traumatic brain injury. *Archives of clinical neuropsychology : the official journal of the National Academy of Neuropsychologists* 2004;19(6):805-16. doi: 10.1016/j.acn.2003.09.005 [published Online First: 2004/08/04]
12. Holm L, Cassidy JD, Carroll LJ, et al. Summary of the WHO Collaborating Centre for Neurotrauma Task Force on Mild Traumatic Brain Injury. *J Rehabil Med* 2005;37(3):137-41. doi: 10.1080/16501970510027321
13. Fung M, Willer B, Moreland D, et al. A proposal for an evidenced-based emergency department discharge form for mild traumatic brain injury. *Brain injury* 2006;20(9):889-94. doi: 10.1080/02699050600831934

14. Meares S, Shores EA, Taylor AJ, et al. Mild traumatic brain injury does not predict acute postconcussion syndrome. *Journal of neurology, neurosurgery, and psychiatry* 2008;79(3):300-6. doi: 10.1136/jnnp.2007.126565
15. McLean SA, Kirsch NL, Tan-Schriner CU, et al. Health status, not head injury, predicts concussion symptoms after minor injury. *Am J Emerg Med* 2009;27(2):182-90. doi: 10.1016/j.ajem.2008.01.054
16. Sirois MJ, Emond M, Ouellet MC, et al. Cumulative incidence of functional decline after minor injuries in previously independent older Canadian individuals in the emergency department. *Journal of the American Geriatrics Society* 2013;61(10):1661-8. doi: 10.1111/jgs.12482 [published Online First: 2013/10/15]
17. Ponsford J, Cameron P, Fitzgerald M, et al. Long-term outcomes after uncomplicated mild traumatic brain injury: a comparison with trauma controls. *J Neurotrauma* 2011;28(6):937-46. doi: 10.1089/neu.2010.1516
18. Brousseau A-A, Émond M, Sirois M-J, et al. Comparison of functional outcomes in elderly who have sustained a minor trauma with or without head injury: a prospective multicenter cohort study. *CJEM* 2016:1-9. doi: 10.1017/cem.2016.368
19. Carroll LJ, Cassidy JD, Cancelliere C, et al. Systematic review of the prognosis after mild traumatic brain injury in adults: cognitive, psychiatric, and mortality outcomes: results of the International Collaboration on Mild Traumatic Brain Injury Prognosis. *Archives of physical medicine and rehabilitation* 2014;95(3 Suppl):S152-73. doi: 10.1016/j.apmr.2013.08.300
20. Luoto TM, Tenovuo O, Kataja A, et al. Who gets recruited in mild traumatic brain injury research? *J Neurotrauma* 2013;30(1):11-6. doi: 10.1089/neu.2012.2611 [published Online First: 2012/08/23]
21. Maas AI, Marmarou A, Murray GD, et al. Clinical trials in traumatic brain injury: current problems and future solutions. *Acta Neurochir Suppl* 2004;89:113-8.
22. Isokuortti H, Iverson GL, Kataja A, et al. Who Gets Head Trauma or Recruited in Mild Traumatic Brain Injury Research? *J Neurotrauma* 2016;33(2):232-41. doi: 10.1089/neu.2015.3888 [published Online First: 2015/06/10]
23. Kristman VL, Borg J, Godbolt AK, et al. Methodological issues and research recommendations for prognosis after mild traumatic brain injury: results of the International Collaboration on Mild Traumatic Brain Injury Prognosis. *Archives of physical medicine and rehabilitation* 2014;95(3 Suppl):S265-77. doi: 10.1016/j.apmr.2013.04.026 [published Online First: 2014/03/04]
24. Begaz T, Kyriacou DN, Segal J, et al. Serum biochemical markers for post-concussion syndrome in patients with mild traumatic brain injury. *J Neurotrauma* 2006;23(8):1201-10. doi: 10.1089/neu.2006.23.1201
25. Jeter CB, Hergenroeder GW, Hylin MJ, et al. Biomarkers for the diagnosis and prognosis of mild traumatic brain injury/concussion. *J Neurotrauma* 2013;30(8):657-70. doi: 10.1089/neu.2012.2439
26. Zetterberg H, Smith DH, Blennow K. Biomarkers of mild traumatic brain injury in cerebrospinal fluid and blood. *Nature reviews Neurology* 2013;9(4):201-10. doi: 10.1038/nrneurol.2013.9 [published Online First: 2013/02/13]
27. Kulbe JR, Geddes JW. Current status of fluid biomarkers in mild traumatic brain injury. *Experimental neurology* 2015 doi: 10.1016/j.expneurol.2015.05.004 [published Online First: 2015/05/20]

- 1  
2  
3 28. Korley FK, Diaz-Arrastia R, Wu AHB, et al. Circulating brain-derived neurotrophic factor  
4 has diagnostic and prognostic value in traumatic brain injury. *J Neurotrauma*  
5 2016;33(2):215-25. doi: 10.1089/neu.2015.3949  
6  
7 29. Neyeloff JL, Fuchs SC, Moreira LB. Meta-analyses and Forest plots using a microsoft excel  
8 spreadsheet: step-by-step guide focusing on descriptive data analysis. *BMC Res Notes*  
9 2012;5:52. doi: 10.1186/1756-0500-5-52  
10  
11 30. Hozo SP, Djulbegovic B, Hozo I. Estimating the mean and variance from the median,  
12 range, and the size of a sample. *BMC Med Res Methodol* 2005;5:13. doi: 10.1186/1471-  
13 2288-5-13  
14  
15 31. Atkins D, Best D, Briss PA, et al. Grading quality of evidence and strength of  
16 recommendations. *BMJ* 2004;328(7454):1490. doi: 10.1136/bmj.328.7454.1490  
17  
18 32. Liberati A, Altman DG, Tetzlaff J, et al. The PRISMA statement for reporting systematic  
19 reviews and meta-analyses of studies that evaluate healthcare interventions:  
20 explanation and elaboration. *BMJ* 2009;339:b2700. doi: 10.1136/bmj.b2700  
21 [published Online First: 2009/07/23]  
22  
23 33. Jagoda AS, Bazarian JJ, Bruns JJ, Jr., et al. Clinical policy: neuroimaging and  
24 decisionmaking in adult mild traumatic brain injury in the acute setting. *Annals of*  
25 *emergency medicine* 2008;52(6):714-48. doi: 10.1016/j.annemergmed.2008.08.021  
26 [published Online First: 2008/11/26]  
27  
28 34. American Congress of Rehabilitation. Definition of mild traumatic brain injury: Report of  
29 the Mild Traumatic Brain Injury Committee of the head Injury Interdisciplinary  
30 Special Interest Group of the American Congress of Rehabilitation Medicine. *Journal of*  
31 *Head Trauma Rehabilitation* 1993;8:86-87.  
32  
33 35. Vos PE, Battistin L, Birbamer G, et al. EFNS guideline on mild traumatic brain injury:  
34 report of an EFNS task force. *Eur J Neurol* 2002;9(3):207-19.  
35  
36 36. Levin HS, Boake C, Song J, et al. Validity and sensitivity to change of the extended Glasgow  
37 Outcome Scale in mild to moderate traumatic brain injury. *J Neurotrauma*  
38 2001;18(6):575-84. doi: 10.1089/089771501750291819  
39  
40 37. Levin HS, Diaz-Arrastia RR. Diagnosis, prognosis, and clinical management of mild  
41 traumatic brain injury. *Lancet Neurol* 2015;14(5):506-17. doi: 10.1016/S1474-  
42 4422(15)00002-2  
43  
44 38. King NS. A systematic review of age and gender factors in prolonged post-concussion  
45 symptoms after mild head injury. *Brain injury* 2014;28(13-14):1639-45. doi:  
46 10.3109/02699052.2014.954271 [published Online First: 2014/09/30]  
47  
48 39. Kim YJ. A systematic review of factors contributing to outcomes in patients with  
49 traumatic brain injury. *Journal of clinical nursing* 2011;20(11-12):1518-32. doi:  
50 10.1111/j.1365-2702.2010.03618.x [published Online First: 2011/04/02]  
51  
52 40. Albrecht JS, Hirshon JM, McCunn M, et al. Increased Rates of Mild Traumatic Brain Injury  
53 Among Older Adults in US Emergency Departments, 2009-2010. *The Journal of head*  
54 *trauma rehabilitation* 2015 doi: 10.1097/HTR.0000000000000190  
55  
56 41. Ronning P, Gunstad PO, Skaga NO, et al. The impact of blood ethanol concentration on the  
57 classification of head injury severity in traumatic brain injury. *Brain injury*  
58 2015;29(13-14):1648-53. doi: 10.3109/02699052.2015.1075154 [published Online  
59 First: 2015/10/20]  
60

- 1  
2  
3 42. Nunn J, Erdogan M, Green RS. The prevalence of alcohol-related trauma recidivism: A  
4 systematic review. *Injury* 2016;47(3):551-8. doi: 10.1016/j.injury.2016.01.008  
5 [published Online First: 2016/02/03]  
6  
7 43. Stocchetti N, Zanier ER. Chronic impact of traumatic brain injury on outcome and quality  
8 of life: a narrative review. *Crit Care* 2016;20(1):148. doi: 10.1186/s13054-016-1318-  
9 1  
10 44. Gould KR, Ponsford JL, Johnston L, et al. Relationship between psychiatric disorders and  
11 1-year psychosocial outcome following traumatic brain injury. *The Journal of head*  
12 *trauma rehabilitation* 2011;26(1):79-89. doi: 10.1097/HTR.0b013e3182036799  
13 [published Online First: 2011/01/07]  
14  
15 45. Donnell AJ, Kim MS, Silva MA, et al. Incidence of postconcussion symptoms in psychiatric  
16 diagnostic groups, mild traumatic brain injury, and comorbid conditions. *Clin*  
17 *Neuropsychol* 2012;26(7):1092-101. doi: 10.1080/13854046.2012.713984  
18  
19 46. Ponsford J, Cameron P, Fitzgerald M, et al. Predictors of postconcussive symptoms 3  
20 months after mild traumatic brain injury. *Neuropsychology* 2012;26(3):304-13. doi:  
21 10.1037/a0027888  
22  
23 47. Mercier E, Mitra B, Cameron PA. Challenges in assessment of the mild traumatic brain  
24 injured geriatric patient. *Injury* 2016;47(5):985-7. doi: 10.1016/j.injury.2016.04.001  
25 [published Online First: 2016/04/30]  
26  
27 48. Ramanathan DM, McWilliams N, Schatz P, et al. Epidemiological shifts in elderly  
28 traumatic brain injury: 18-year trends in Pennsylvania. *J Neurotrauma*  
29 2012;29(7):1371-8. doi: 10.1089/neu.2011.2197  
30  
31 49. Stocchetti N, Paterno R, Citerio G, et al. Traumatic brain injury in an aging population. *J*  
32 *Neurotrauma* 2012;29(6):1119-25. doi: 10.1089/neu.2011.1995 [published Online  
33 First: 2012/01/10]  
34  
35 50. Andriessen TM, Horn J, Franschman G, et al. Epidemiology, severity classification, and  
36 outcome of moderate and severe traumatic brain injury: a prospective multicenter  
37 study. *J Neurotrauma* 2011;28(10):2019-31. doi: 10.1089/neu.2011.2034 [published  
38 Online First: 2011/07/27]  
39  
40 51. Adams SD, Cotton BA, McGuire MF, et al. Unique pattern of complications in elderly  
41 trauma patients at a Level I trauma center. *J Trauma Acute Care Surg* 2012;72(1):112-  
42 8. doi: 10.1097/TA.0b013e318241f073  
43  
44 52. McIntyre A, Mehta S, Janzen S, et al. A meta-analysis of functional outcome among older  
45 adults with traumatic brain injury. *NeuroRehabilitation* 2013;32(2):409-14. doi:  
46 10.3233/nre-130862 [published Online First: 2013/03/29]  
47  
48 53. Calcagnile O, Holmen A, Chew M, et al. S100B levels are affected by older age but not by  
49 alcohol intoxication following mild traumatic brain injury. *Scandinavian journal of*  
50 *trauma, resuscitation and emergency medicine* 2013;21:52. doi: 10.1186/1757-7241-  
51 21-52 [published Online First: 2013/07/09]  
52  
53 54. Losoi H, Silverberg ND, Waljas M, et al. Recovery from Mild Traumatic Brain Injury in  
54 Previously Healthy Adults. *J Neurotrauma* 2016;33(8):766-76. doi:  
55 10.1089/neu.2015.4070 [published Online First: 2015/10/07]  
56  
57 55. Williams WH, Potter S, Ryland H. Mild traumatic brain injury and Postconcussion  
58 Syndrome: a neuropsychological perspective. *Journal of neurology, neurosurgery, and*  
59 *psychiatry* 2010;81(10):1116-22. doi: 10.1136/jnnp.2008.171298  
60

- 1  
2  
3 56. Reuben A, Sampson P, Harris AR, et al. Postconcussion syndrome (PCS) in the emergency  
4 department: predicting and pre-empting persistent symptoms following a mild  
5 traumatic brain injury. *Emergency medicine journal : EMJ* 2014;31(1):72-7. doi:  
6 10.1136/emered-2012-201667 [published Online First: 2013/03/08]  
7  
8 57. Cassidy JD, Cancelliere C, Carroll LJ, et al. Systematic review of self-reported prognosis in  
9 adults after mild traumatic brain injury: results of the International Collaboration on  
10 Mild Traumatic Brain Injury Prognosis. *Archives of physical medicine and*  
11 *rehabilitation* 2014;95(3 Suppl):S132-51. doi: 10.1016/j.apmr.2013.08.299  
12  
13 58. Ingebrigtsen T, Romner B, Kongstad P, et al. Increased serum concentrations of protein S-  
14 100 after minor head injury: a biochemical serum marker with prognostic value?  
15 *Journal of neurology, neurosurgery, and psychiatry* 1995;59(1):103-4. [published  
16 Online First: 1995/07/01]  
17  
18 59. Waterloo K, Ingebrigtsen T, Romner B. Neuropsychological function in patients with  
19 increased serum levels of protein S-100 after minor head injury. *Acta Neurochir*  
20 1997;139(1):26-31. doi: 10.1007/BF01850864  
21  
22 60. Ingebrigtsen T, Waterloo K, Jacobsen EA, et al. Traumatic brain damage in minor head  
23 injury: Relation of serum S-100 protein measurements to magnetic resonance  
24 imaging and neurobehavioral outcome. *Neurosurgery* 1999;45(3):468-75. doi:  
25 10.1097/00006123-199909000-00010  
26  
27 61. Ingebrigtsen T, Romner B, Marup-Jensen S, et al. The clinical value of serum S-100  
28 protein measurements in minor head injury: a Scandinavian multicentre study. *Brain*  
29 *injury* 2000;14(12):1047-55.  
30  
31 62. Herrmann M, Curio N, Jost S, et al. Release of biochemical markers of damage to neuronal  
32 and glial brain tissue is associated with short and long term neuropsychological  
33 outcome after traumatic brain injury. *Journal of Neurology, Neurosurgery & Psychiatry*  
34 2001;70(1):95-100. doi: 10.1136/jnnp.70.1.95  
35  
36 63. de Kruijk JR, Leffers P, Menheere PPCA, et al. Prediction of post-traumatic complaints  
37 after mild traumatic brain injury: Early symptoms and biochemical markers. *Journal*  
38 *of Neurology, Neurosurgery & Psychiatry* 2002;73(6):727-32. doi:  
39 10.1136/jnnp.73.6.727  
40  
41 64. Townend WJ, Guy MJ, Pani MA, et al. Head injury outcome prediction in the emergency  
42 department: A role for protein S-100B? *Journal of Neurology Neurosurgery and*  
43 *Psychiatry* 2002;73(5):542-46.  
44  
45 65. de Kruijk JR, Leffers P, Menheere PPC, et al. Olfactory function after mild traumatic brain  
46 injury. *Brain injury* 2003;17(1):73-78 6p.  
47  
48 66. Savola O, Hillbom M. Early predictors of post-concussion symptoms in patients with mild  
49 head injury. *Eur J Neurol* 2003;10(2):175-81. doi: 10.1046/j.1468-1331.2003.00552.x  
50  
51 67. Stranjalis G, Korfiatis S, Papapetrou C, et al. Elevated serum S-100B protein as a predictor  
52 of failure to short-term return to work or activities after mild head injury. *J*  
53 *Neurotrauma* 2004;21(8):1070-75. doi: 10.1089/0897715041651088  
54  
55 68. de Boussard CN, Lundin A, Karlstedt D, et al. S100 and cognitive impairment after mild  
56 traumatic brain injury. *Journal of Rehabilitation Medicine (Taylor & Francis Ltd)*  
57 2005;37(1):53-57 5p.  
58  
59 69. Stålnacke B, Björnstig U, Karlsson K, et al. One-year follow-up of mild traumatic brain  
60 injury: post-concussion symptoms, disabilities and life satisfaction in relation to



- 1  
2  
3 serum levels of S-100B and neurone-specific enolase in acute phase. *Journal of*  
4 *Rehabilitation Medicine (Taylor & Francis Ltd)* 2005;37(5):300-05 6p.  
5  
6 70. Stapert S, de Kruijk J, Houx P, et al. S-100B concentration is not related to neurocognitive  
7 performance in the first month after mild traumatic brain injury. *Eur Neurol*  
8 2005;53(1):22-26. doi: 10.1159/000083678  
9  
10 71. Bazarian JJ, Zemlan FP, Mookerjee S, et al. Serum S-100B and cleaved-tau are poor  
11 predictors of long-term outcome after mild traumatic brain injury. *Brain injury*  
12 2006;20(7):759-65. doi: 10.1080/02699050500488207  
13  
14 72. Bazarian JJ, Beck C, Blyth B, et al. Impact of creatine kinase correction on the predictive  
15 value of S-100B after mild traumatic brain injury. *Restor Neurol Neurosci*  
16 2006;24(3):163-72.  
17  
18 73. Balut M, Koksall O, Dogan S, et al. Tau protein as a serum marker of brain damage in mild  
19 traumatic brain injury: preliminary results. *Advances in Therapy* 2006;23(1):12-22  
20 11p.  
21  
22 74. Naeimi ZS, Weinhofer A, Sarahrudi K, et al. Predictive value of S-100B protein and neuron  
23 specific-enolase as markers of traumatic brain damage in clinical use. *Brain injury*  
24 2006;20(5):463-68. doi: 10.1080/02699050600664418  
25  
26 75. Sojka P, Stalnacke BM, Bjornstig U, et al. One-year follow-up of patients with mild  
27 traumatic brain injury: Occurrence of post-traumatic stress-related symptoms at  
28 follow-up and serum levels of cortisol, S-100B and neuron-specific enolase in acute  
29 phase. *Brain injury* 2006;20(6):613-20. doi: 10.1080/02699050600676982  
30  
31 76. Jakola AS, Muller K, Larsen M, et al. Five-year outcome after mild head injury: a  
32 prospective controlled study. *Acta Neurol Scand* 2007;115(6):398-402. doi:  
33 10.1111/j.1600-0404.2007.00827.x  
34  
35 77. Stalnacke BM, Elgh E, Sojka P. One-year follow-up of mild traumatic brain injury:  
36 Cognition, disability and life satisfaction of patients seeking consultation. *J Rehabil*  
37 *Med* 2007;39(5):405-11. doi: 10.2340/16501977-0057  
38  
39 78. Lima DP, Simao Filho C, Abib Sde C, et al. Quality of life and neuropsychological changes  
40 in mild head trauma. Late analysis and correlation with S100B protein and cranial CT  
41 scan performed at hospital admission. *Injury* 2008;39(5):604-11. doi:  
42 10.1016/j.injury.2007.11.008 [published Online First: 2008/03/11]  
43  
44 79. Ma M, Lindsell CJ, Rosenberry CM, et al. Serum cleaved tau does not predict  
45 postconcussion syndrome after mild traumatic brain injury. *American Journal of*  
46 *Emergency Medicine* 2008;26(7):763-68 6p.  
47  
48 80. Schutze M, Kundt G, Buchholz K, et al. [Which factors are predictive for long-term  
49 complaints after mild traumatic brain injuries?]. *Versicherungsmedizin /*  
50 *herausgegeben von Verband der Lebensversicherungs-Unternehmen eV und Verband*  
51 *der Privaten Krankenversicherung eV* 2008;60(2):78-83. [published Online First:  
52 2008/07/04]  
53  
54 81. Muller K, Ingebrigtsen T, Wilsgaard T, et al. Prediction of Time Trends in Recovery of  
55 Cognitive Function after Mild Head Injury. *Neurosurgery* 2009;64(4):698-704. doi:  
56 10.1227/01.NEU.0000340978.42892.78  
57  
58 82. Kleinert K, Schleich F, Biasca N, et al. Is there a Correlation between S100 beta and Post-  
59 Concussion Symptoms after Mild Traumatic Brain Injury? *Zentbl Chir*  
60 2010;135(3):277-78. doi: 10.1055/s-0028-1098766

- 1  
2  
3 83. Meric E, Gunduz A, Turedi S, et al. The prognostic value of neuron-specific enolase in  
4 head trauma patients. *J Emerg Med* 2010;38(3):297-301. doi:  
5 10.1016/j.jemermed.2007.11.032 [published Online First: 2008/05/24]  
6  
7 84. Topolovec-Vranic J, Pollmann-Mudryj MA, Ouchterlony D, et al. The Value of Serum  
8 Biomarkers in Prediction Models of Outcome After Mild Traumatic Brain Injury. *J*  
9 *Trauma-Injury Infect Crit Care* 2011;71:S478-S86. doi:  
10 10.1097/TA.0b013e318232fa70  
11  
12 85. Metting Z, Wilczak N, Rodiger LA, et al. GFAP and S100B in the acute phase of mild  
13 traumatic brain injury. *Neurology* 2012;78(18):1428-33. doi:  
14 10.1212/WNL.0b013e318253d5c7  
15  
16 86. Okonkwo DO, Yue JK, Puccio AM, et al. GFAP-BDP as an acute diagnostic marker in  
17 traumatic brain injury: Results from the prospective transforming research and  
18 clinical knowledge in traumatic brain injury study. *J Neurotrauma* 2013;30(17):1490-  
19 97. doi: 10.1089/neu.2013.2883  
20  
21 87. Abbasi M, Sajjadi M, Fathi M, et al. Serum S100B protein as an outcome prediction tool in  
22 emergency department patients with traumatic brain injury. *Turkiye Acil Tıp Dergisi*  
23 2014;14(4):147-52.  
24  
25 88. Diaz-Arrastia R, Wang KK, Papa L, et al. Acute biomarkers of traumatic brain injury:  
26 relationship between plasma levels of ubiquitin C-terminal hydrolase-L1 and glial  
27 fibrillary acidic protein. *J Neurotrauma* 2014;31(1):19-25. doi:  
28 10.1089/neu.2013.3040 [published Online First: 2013/07/20]  
29  
30 89. Ryb GE, Dischinger PC, Auman KM, et al. S-100 beta does not predict outcome after mild  
31 traumatic brain injury. *Brain injury* 2014;28(11):1430-35. doi:  
32 10.3109/02699052.2014.919525  
33  
34 90. Heidari K, Asadollahi S, Jamshidian M, et al. Prediction of neuropsychological outcome  
35 after mild traumatic brain injury using clinical parameters, serum S100B protein and  
36 findings on computed tomography. *Brain injury* 2015;29(1):33-40. doi:  
37 10.3109/02699052.2014.948068  
38  
39 91. Dey S, Shukla D. To Study the Acute Phase Serum Biomarkers in Patients with Mild  
40 Traumatic Brain Injury (Mtb) and Correlate with Short Term Cognitive Deficits. *J*  
41 *Neurotrauma* 2016;33(3):A8-A8.  
42  
43 92. Yang T, Song J, Bu X, et al. Elevated serum miR-93, miR-191, and miR-499 are  
44 noninvasive biomarkers for the presence and progression of traumatic brain injury. *J*  
45 *Neurochem* 2016;137(1):122-9. doi: 10.1111/jnc.13534  
46  
47  
48  
49  
50  
51  
52  
53  
54  
55  
56  
57  
58  
59  
60

1  
2  
3  
4  
5  
6  
7  
8  
9  
10  
11  
12  
13  
14  
15  
16  
17  
18  
19  
20  
21  
22  
23  
24  
25  
26  
27  
28  
29  
30  
31  
32  
33  
34  
35  
36  
37  
38  
39  
40  
41  
42  
43  
44  
45  
46  
47  
48  
49  
50  
51  
52  
53  
54  
55  
56  
57  
58  
59  
60

**Figure legend**

Figure 1. PRISMA flow diagram of included studies

**Supplementary files legend**

**eFigure 1.** Age of patients enrolled in the included studies

**eTable 1.** Search strategy for the Excerpta Medica dataBASE (EMBASE)

**eTable 2.** List of congresses and conferences screened

**eTable 3.** PRISMA Checklist

For peer review only

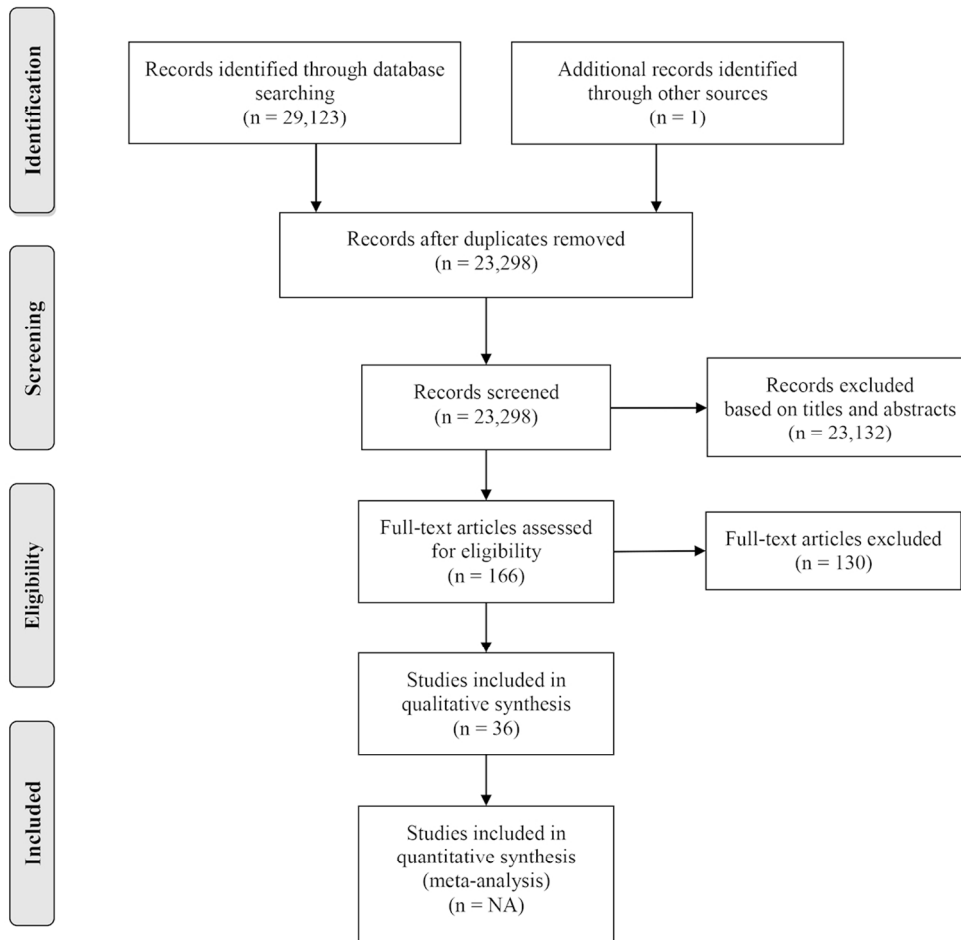

Figure 1. PRISMA flow diagram of included studies

112x119mm (300 x 300 DPI)

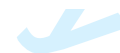

**eTable 1.** Search strategy for the Excerpta Medica dataBASE (EMBASE)

| <b>EMBASE SEARCH STRATEGY</b> |                                                                                                                     |
|-------------------------------|---------------------------------------------------------------------------------------------------------------------|
|                               | <b>Traumatic brain injury</b>                                                                                       |
| 1                             | 1. ( ('brain injury':ti,ab OR 'brain injuries':ti,ab OR 'brain injured':ti,ab OR 'brain injure':ti,ab OR 'brain     |
| 2                             | injures':ti,ab OR 'brain trauma':ti,ab OR 'brain traumas':ti,ab OR 'brain traumatic':ti,ab OR brain:ti,ab OR        |
| 3                             | brain:ti,ab OR                                                                                                      |
| 4                             |                                                                                                                     |
| 5                             | 'mild traumatic brain injury':ti,ab OR 'mild traumatic brain injure':ti,ab OR 'mild traumatic brain injured':ti,ab  |
| 6                             | OR 'mild traumatic brain injures':ti,ab OR 'mild traumatic brain injuries':ti,ab OR 'minor traumatic brain          |
| 7                             | injury':ti,ab OR 'minor traumatic brain injure':ti,ab OR 'minor traumatic brain injured':ti,ab OR 'minor traumatic  |
| 8                             | brain injures':ti,ab OR 'minor traumatic brain injuries':ti,ab OR 'minimal traumatic brain injury':ti,ab OR         |
| 9                             | 'minimal traumatic brain injure':ti,ab OR 'minimal traumatic brain injured':ti,ab OR 'minimal traumatic brain       |
| 10                            | injures':ti,ab OR 'minimal traumatic brain injuries':ti,ab OR mtbi:ti,ab OR 'minor head trauma':ti,ab OR 'minor     |
| 11                            | head traumas':ti,ab OR 'minor head traumatic':ti,ab OR 'minimal head trauma':ti,ab OR 'minimal head                 |
| 12                            | traumas':ti,ab OR 'minimal head traumatic':ti,ab OR concussion*:ti,ab OR 'brain concussion'/exp OR 'brain           |
| 13                            | concussions'/exp OR contusions:ti,ab OR contusions/exp OR 'brain contusion'/exp OR                                  |
| 14                            |                                                                                                                     |
| 15                            | 'brains injury':ti,ab OR 'brains injuries':ti,ab OR 'brains injured':ti,ab OR 'brains injure':ti,ab OR 'brains      |
| 16                            | injures':ti,ab OR 'brains trauma':ti,ab OR 'brains traumas':ti,ab OR 'brains traumatic':ti,ab OR brains:ti,ab OR    |
| 17                            | brains:ti,ab OR                                                                                                     |
| 18                            |                                                                                                                     |
| 19                            | 'brainstem injury':ti,ab OR 'brainstem injuries':ti,ab OR 'brainstem injured':ti,ab OR 'brainstem injure':ti,ab OR  |
| 20                            | 'brainstem injures':ti,ab OR 'brainstem trauma':ti,ab OR 'brainstem traumas':ti,ab OR 'brainstem traumatic':ti,ab   |
| 21                            | OR brainstem:ti,ab OR brainstem:ti,ab OR                                                                            |
| 22                            |                                                                                                                     |
| 23                            | 'head injury':ti,ab OR 'head injuries':ti,ab OR 'head injured':ti,ab OR 'head injure':ti,ab OR 'head injures':ti,ab |
| 24                            | OR 'head trauma':ti,ab OR 'head traumas':ti,ab OR 'head traumatic':ti,ab OR head:ti,ab OR head/exp OR               |
| 25                            |                                                                                                                     |
| 26                            | heads:ti,ab OR 'heads injuries':ti,ab OR 'heads injured':ti,ab OR 'heads injure':ti,ab OR 'heads injures':ti,ab OR  |
| 27                            | 'heads trauma':ti,ab OR 'heads traumas':ti,ab OR 'heads traumatic':ti,ab OR 'heads':ti,ab OR heads:ti,ab OR         |
| 28                            |                                                                                                                     |
| 29                            | 'Brain edema'/exp OR 'Brain edema':ti,ab OR 'Brain swelling':ti,ab OR 'cerebral edema':ti,ab OR 'intracranial       |
| 30                            | edema':ti,ab OR 'Hematoma'/exp OR Hematoma:ti,ab OR Haematoma:ti,ab OR 'brain hematoma'/exp OR                      |
| 31                            | 'Hemorrhage'/exp OR Hemorrhage:ti,ab OR Haemorrhage:ti,ab OR 'subarachnoid hemorrhage'/exp OR 'brain                |
| 32                            | hemorrhage'/exp OR 'brain ventricle hemorrhage'/exp OR                                                              |
| 33                            |                                                                                                                     |
| 34                            | 'craniocerebral injury':ti,ab OR 'craniocerebral injuries':ti,ab OR 'craniocerebral injured':ti,ab OR               |
| 35                            | 'craniocerebral injure':ti,ab OR 'craniocerebral injures':ti,ab OR 'craniocerebral trauma':ti,ab OR 'craniocerebral |
| 36                            | traumas':ti,ab OR 'craniocerebral traumatic':ti,ab OR craniocerebral:ti,ab OR craniocerebral*:ti,ab OR              |
| 37                            |                                                                                                                     |
| 38                            | 'intracranial injury':ti,ab OR 'intracranial injuries':ti,ab OR 'intracranial injured':ti,ab OR 'intracranial       |
| 39                            | injure':ti,ab OR 'intracranial injures':ti,ab OR 'intracranial trauma':ti,ab OR 'intracranial traumas':ti,ab OR     |
| 40                            | 'intracranial traumatic':ti,ab OR intracranial:ti,ab OR intracrani*:ti,ab OR                                        |
| 41                            |                                                                                                                     |
| 42                            | 'intra-cranial injury':ti,ab OR 'intra-cranial injuries':ti,ab OR 'intra-cranial injured':ti,ab OR 'intra-cranial   |
| 43                            | injure':ti,ab OR 'intra-cranial injures':ti,ab OR 'intra-cranial trauma':ti,ab OR 'intra-cranial traumas':ti,ab OR  |
| 44                            | 'intra-cranial traumatic':ti,ab OR 'intra-cranial':ti,ab OR 'intra-crani':ti,ab OR                                  |
| 45                            |                                                                                                                     |
| 46                            | 'intercranial injury':ti,ab OR 'intercranial injuries':ti,ab OR 'intercranial injured':ti,ab OR 'intercranial       |
| 47                            | injure':ti,ab OR 'intercranial injures':ti,ab OR 'intercranial trauma':ti,ab OR 'intercranial traumas':ti,ab OR     |
| 48                            | 'intercranial traumatic':ti,ab OR intercranial:ti,ab OR intercrani*:ti,ab OR                                        |
| 49                            |                                                                                                                     |
| 50                            | 'inter cranial injury':ti,ab OR 'inter-cranial injuries':ti,ab OR 'inter-cranial injured':ti,ab OR 'inter-cranial   |
| 51                            | injure':ti,ab OR 'inter-cranial injures':ti,ab OR 'inter-cranial trauma':ti,ab OR 'inter-cranial traumas':ti,ab OR  |
| 52                            | 'inter-cranial traumatic':ti,ab OR 'inter-cranial':ti,ab OR                                                         |
| 53                            |                                                                                                                     |
| 54                            |                                                                                                                     |
| 55                            |                                                                                                                     |
| 56                            |                                                                                                                     |
| 57                            |                                                                                                                     |
| 58                            |                                                                                                                     |
| 59                            |                                                                                                                     |
| 60                            |                                                                                                                     |

1  
2  
3  
4  
5  
6  
7  
8  
9  
10  
11  
12  
13  
14  
15  
16  
17  
18  
19  
20  
21  
22  
23  
24  
25  
26  
27  
28  
29  
30  
31  
32  
33  
34  
35  
36  
37  
38  
39  
40  
41  
42  
43  
44  
45  
46  
47  
48  
49  
50  
51  
52  
53  
54  
55  
56  
57  
58  
59  
60

'cerebral injury':ti,ab OR 'cerebral injuries':ti,ab OR 'cerebral injured':ti,ab OR 'cerebral injure':ti,ab OR 'cerebral injures':ti,ab OR 'cerebral trauma':ti,ab OR 'cerebral traumas':ti,ab OR 'cerebral traumatic':ti,ab OR cerebral:ti,ab OR cerebr\*:ti,ab OR

'cerebellum injury':ti,ab OR 'cerebellum injuries':ti,ab OR 'cerebellum injured':ti,ab OR 'cerebellum injure':ti,ab OR 'cerebellum injures':ti,ab OR 'cerebellum trauma':ti,ab OR 'cerebellum traumas':ti,ab OR 'cerebellum traumatic':ti,ab OR cerebellum:ti,ab OR cerebel\*:ti,ab OR

'forebrain injury':ti,ab OR 'forebrain injuries':ti,ab OR 'forebrain injured':ti,ab OR 'forebrain injure':ti,ab OR 'forebrain injures':ti,ab OR 'forebrain trauma':ti,ab OR 'forebrain traumas':ti,ab OR 'forebrain traumatic':ti,ab OR forebrain:ti,ab OR forebrain\*:ti,ab) AND

(injury\*:ti,ab OR injuries:ti,ab OR injured:ti,ab OR injure:ti,ab OR injures:ti,ab OR trauma:ti,ab OR traumas:ti,ab OR traumatic\*:ti,ab OR traumato\*:ti,ab OR damag\*:ti,ab)) OR

TBI:ti,ab OR Glasgow coma scale:ti,ab OR GCS:ti,ab OR 'traumatic brain injury':ti,ab OR 'traumatic brain injure':ti,ab OR 'traumatic brain injured':ti,ab OR 'traumatic brain injures':ti,ab OR 'traumatic brain injuries':ti,ab OR

'Head injury'/de OR 'brain injury'/de OR 'brain hemorrhage'/de OR 'diffuse axonal injury'/de OR 'coma'/de OR 'brain hemorrhage'/de OR 'Glasgow coma scale'/de OR

'blast injury'/exp OR 'blast-induced brain injury'/exp OR 'Blast exposition':ti,ab OR 'blast injuries':ti,ab OR 'blast injure':ti,ab OR 'blast injured':ti,ab OR 'sports-related concussion':ti,ab OR 'sport-related concussion':ti,ab OR SRC:ti,ab

## **Biomarkers**

2. biomarker\*:ab,ti OR 'biomarker'/exp OR 'biologic marker':ab,ti OR 'biologic markers':ab,ti OR 'biological marker':ab,ti OR 'biological markers':ab,ti OR 'biochemical marker':ab,ti OR 'biochemical markers':ab,ti OR 'laboratory marker':ab,ti OR 'laboratory markers':ab,ti OR 'immunological marker':ab,ti OR 'immunological markers':ab,ti OR 'immune marker':ab,ti OR 'immune markers':ab,ti OR 'serum marker':ab,ti OR 'serum markers':ab,ti OR 'clinical marker':ab,ti OR 'clinical markers':ab,ti OR 'surrogate end point':ab,ti OR 'surrogate end points':ab,ti OR 'surrogate endpoint':ab,ti OR 'surrogate endpoints':ab,ti OR

'neuronal protein'/exp OR 'neuronal proteins':ti,ab OR 'neuronal protein':ti,ab OR 'neuronal marker':ti,ab OR 'neuronal markers':ti,ab OR 'nerve tissue protein':ti,ab OR 'nerve tissue proteins':ti,ab OR 'nerve protein'/exp OR 'nerve proteins':ti,ab OR 'neuronal calcium sensor'/exp OR 'neuron specific nuclear protein'/exp OR

'astrocyte protein':ti,ab OR 'astrocyte protein'/exp OR

'S-100':ti,ab OR S100\*:ti,ab OR 'S100B':ti,ab OR 'S-100B':ti,ab OR 'S100BB':ti,ab OR 'S-100BB':ti,ab OR 'S-100B protein':ti,ab OR 'S100-β':ti,ab OR 'S100β':ti,ab OR 'protein S100B'/exp OR

GFAP:ti,ab OR 'GFAP'/exp OR 'glial protein':ti,ab OR 'glial proteins':ti,ab OR 'glial fibrillary acidic protein':ti,ab OR 'glial fibrillary acidic proteins':ti,ab OR 'glial intermediate filament protein':ti,ab OR 'glial intermediate filament proteins':ti,ab OR astroprotein\*:ti,ab OR 'GFA-protein':ti,ab OR 'GFA-proteins':ti,ab OR 'Glial Fibrillary Acidic Protein'/exp OR

'neuron specific enolase'/exp OR 'Neuron specific nuclear protein'/exp OR NSE:ti,ab OR NSE/exp OR 'neuron specific enolase':ti,ab OR 'neuron-specific enolase':ti,ab OR 'gamma-enolase':ti,ab OR 'nervous system specific enolase':ti,ab OR 'phosphopyruvate hydratase':ti,ab OR 'Phosphopyruvate Hydratase':ti,ab OR 'enolase'/exp OR

'C-tau':ti,ab OR 'C-tau' OR 'cleaved-tau':ti,ab OR 'tau protein':ti,ab OR 'tau Proteins':ti,ab OR 'tau protein'/exp OR

'UCH-L1':ti,ab OR UCHL1:ti,ab OR 'ubiquitin carboxyl-terminal hydrolase 1-1':ti,ab OR 'ubiquitin c-terminal

hydrolase':ti,ab OR 'ubiquitin carboxy terminal esterase':ti,ab OR 'ubiquitin thiolesterase':ti,ab OR 'ubiquitin'/exp OR 'ubiquitin protein ligase'/exp OR 'ubiquitin tholesterase'/exp OR

SBDP:ti,ab OR SBDP150:ti,ab OR SBDP145:ti,ab OR SBDP120:ti,ab OR 'SBDP'/exp OR 'Spectrin'/exp OR 'fodrin'/exp OR 'spectrin breakdown product'/exp OR

'NF-H':ti,ab OR NFH:ti,ab OR 'NFP-200':ti,ab OR NFP200:ti,ab OR 'hyperphosphorylated neurofilament':ti,ab OR 'neurofilament protein':ti,ab OR 'neurofilament proteins':ti,ab OR 'neurofilament H protein':ti,ab OR 'neurofilament H proteins':ti,ab OR 'neurofilament triplet protein':ti,ab OR 'neurofilament triplet proteins':ti,ab OR 'neurofilament M protein'/exp OR 'neurofilament'/exp OR

'microRNA'/exp OR 'MicroRNAs'/exp OR

'BDNF':ti,ab OR 'BDNF'/exp OR 'brain derived neurotrophic factor'/exp OR 'brain derived neurotrophic factor receptor'

### Outcomes (post-concussion symptoms related terms)

3. 'post-concussion syndrome'/exp OR 'post-concussion syndrome':ti,ab OR 'postconcussion':ti,ab OR 'post-concussion symptom':ti,ab OR 'postconcussion symptoms':ti,ab OR 'postconcussion syndrom':ti,ab OR 'post concussion syndrom':ti,ab OR 'post-concussive symptom':ti,ab OR 'postconcussive symptom':ti,ab OR 'post concussive symptom':ti,ab OR 'post-concussive syndrom':ti,ab OR 'postconcussive syndrom':ti,ab OR 'post concussive syndrom':ti,ab OR 'post-concussion recovery':ti,ab OR 'postconcussion recovery':ti,ab OR 'post concussion recovery':ti,ab OR 'post-traumatic symptom':ti,ab OR 'posttraumatic symptom':ti,ab OR 'post traumatic symptom':ti,ab OR

'persistent':ti,ab OR 'persistent concussive syndrome':ti,ab OR 'postconcussion syndrome'/exp OR 'postconcussion syndrom':ti,ab OR 'long term':ti,ab OR 'permanent':ti,ab OR 'prolonged':ti,ab OR 'late recovery':ti,ab OR 'recovery':ti,ab OR 'poor outcome':ti,ab OR 'outcome':ti,ab OR 'disability'/exp OR 'disability':ti,ab OR 'sick leave':ti,ab OR 'medical leave'/exp OR 'glasgow outcome scale'/exp OR 'glasgow outcome scale':ti,ab OR 'assessment':ti,ab OR 'patient outcome assessment':ti,ab OR 'outcome assessment'/exp OR 'outcome assessment':ti,ab OR 'symptom assessment'/exp OR 'symptom assessment':ti,ab OR

'neurologic symptom':ti,ab OR 'neurologic symptoms':ti,ab OR 'neurologic manifestation':ti,ab OR 'Neurologic Manifestations':ti,ab OR 'neurological problem':ti,ab OR 'neurological problems':ti,ab OR

'neurologic disease':ti,ab OR 'cognitive symptom':ti,ab OR 'cognitive symptoms':ti,ab OR 'mild cognitive impairment':ti,ab OR 'cognitive impairment':ti,ab OR 'cognitive defect':ti,ab OR 'cognition':ti,ab OR 'Neurobehavioral manifestations':ti,ab OR 'neuropsychological symptom':ti,ab OR 'neuropsychological symptoms':ti,ab OR 'behavioral symptom':ti,ab OR 'behavioral symptoms':ti,ab OR 'behavioural symptom':ti,ab OR 'behavioural symptoms':ti,ab OR

'rivermead post-concussion symptoms questionnaire':ti,ab OR 'rivermead post-concussion questionnaire':ti,ab OR 'rivermead post concussion symptoms questionnaire':ti,ab OR 'rivermead post concussion questionnaire':ti,ab OR

'prognosis'/exp OR 'prognosis':ti,ab OR 'predictive value'/exp OR 'predictive value':ti,ab OR 'predictive values':ti,ab OR 'predictive validity'/exp OR 'predictive validity':ti,ab OR 'clinical course'/exp OR 'clinical course':ti,ab OR 'disease course'/exp OR 'disease course':ti,ab OR 'incidence':ti,ab OR 'mortality':ti,ab OR

'Quality of life'/exp OR 'quality of life':ti,ab OR 'quality of life assessment'/exp OR 'quality of working life'/exp OR 'return to work'/exp OR 'return to work' OR

'follow up'/exp OR 'follow up studies':ti,ab OR 'follow up study':ti,ab OR 'follow-up studies':ti,ab OR 'follow-up study':ti,ab OR 'comparative study'/exp OR 'comparative study':ti,ab OR 'cohort studies':ti,ab OR 'cohort study':ti,ab OR 'cohort analysis'/exp OR 'cohort analysis':ti,ab OR 'longitudinal study'/exp OR 'longitudinal study':ti,ab OR 'longitudinal studies':ti,ab OR 'randomized controlled trial'/exp OR 'randomized controlled trial':ti,ab OR 'controlled clinical trial'/exp OR 'controlled clinical trial':ti,ab OR 'clinical trial'/exp OR 'clinical

1  
2  
3  
4  
5  
6  
7  
8  
9  
10  
11  
12  
13  
14  
15  
16  
17  
18  
19  
20  
21  
22  
23  
24  
25  
26  
27  
28  
29  
30  
31  
32  
33  
34  
35  
36  
37  
38  
39  
40  
41  
42  
43  
44  
45  
46  
47  
48  
49  
50  
51  
52  
53  
54  
55  
56  
57  
58  
59  
60

trial':ti,ab OR

headache/exp OR 'headache':ti,ab OR 'Posttraumatic headache'/exp OR 'posttraumatic headache':ti,ab OR 'primary headache'/exp OR 'secondary headache'/exp OR 'dizziness'/exp OR 'dizziness':ti,ab OR 'vertigo'/exp OR 'vertigo':ti,ab OR 'nausea'/exp OR 'nausea':ti,ab OR 'nausea and vomiting'/exp OR 'nausea and vomiting':ti,ab OR 'vomiting'/exp OR 'vomiting':ti,ab OR 'hyperacusis':ti,ab OR 'loudness recruitment'/exp OR 'loudness recruitment':ti,ab OR 'noise sensitivity':ti,ab OR 'sleep disturbance':ti,ab OR 'sleep disorder'/exp OR 'sleep disorder':ti,ab OR 'sleep arousal disorder'/exp OR 'sleep arousal disorder':ti,ab OR 'dyssomnia':ti,ab OR 'insomnia':ti,ab OR fatigue/exp OR 'fatigue':ti,ab OR 'mental fatigue':ti,ab OR 'dysthymia'/exp OR 'dysthymia':ti,ab OR 'chronic fatigue syndrome'/exp OR 'chronic fatigue syndrome':ti,ab OR 'irritable mood':ti,ab OR 'irritable':ti,ab OR 'irritability'/exp OR 'annoyance':ti,ab OR 'impatience':ti,ab OR 'anger'/exp OR 'anger':ti,ab OR 'despresion'/exp OR 'depression':ti,ab OR 'depressive disorder':ti,ab OR 'long term depression'/exp OR 'long-term synaptic depression':ti,ab OR 'frustration'/exp OR 'frustration':ti,ab OR 'frustrated':ti,ab OR 'Impatient':ti,ab OR 'forgetfulness':ti,ab OR 'memory disorder'/exp OR 'memory disorder':ti,ab OR 'memory disorders':ti,ab OR 'poor memory':ti,ab OR 'information processing speed':ti,ab OR 'deceleration in information processing':ti,ab OR 'impede processing speed':ti,ab OR 'speed of processing':ti,ab OR 'processing speed':ti,ab OR 'speed of information processing':ti,ab OR 'information processing'/exp OR 'working memory'/exp OR 'working memory':ti,ab OR 'short term memory'/exp OR 'short term memory':ti,ab OR 'vision disorder':ti,ab OR 'vision disorders':ti,ab OR 'visual disorder'/exp OR 'visual disorder':ti,ab OR 'visual impairment'/exp OR 'visual impairment':ti,ab OR 'visual impairments':ti,ab OR 'vision disability':ti,ab OR 'vision disabilities':ti,ab OR 'blurred vision'/exp OR 'blurred vision':ti,ab OR 'visual acuity'/exp OR 'visual acuity':ti,ab OR 'visual consequences':ti,ab OR 'visual deficit':ti,ab OR 'visual deficits':ti,ab OR 'vision loss':ti,ab OR 'visual function':ti,ab OR 'visual system function'/exp OR 'vision'/exp OR 'visual quality of life':ti,ab OR 'photophobia'/exp OR 'photophobia':ti,ab OR 'light sensitivity':ti,ab OR 'light sensitivities':ti,ab OR 'diplopia'/exp OR 'diplopia':ti,ab OR 'double vision':ti,ab OR 'Psychomotor agigation':ti,ab OR 'restlessness'/exp OR 'restlessness':ti,ab OR 'psychomotor hyperactivity':ti,ab OR 'psychomotor excitement':ti,ab OR 'Anxiety'/exp OR 'Anxiety':ti,ab OR 'Anxieties':ti,ab OR 'Nervousness':ti,ab OR 'Hypervigilance':ti,ab OR 'Anxiety Assessment':ti,ab OR 'Anxiety Disorders':ti,ab OR 'Loss of concentration':ti,ab OR 'Loss of attention':ti,ab OR 'Drowsiness':ti,ab

**Finalization**

4. #1 AND #2 AND #3



**eTable 2.** List of congresses and conferences screened

- 1) American Academy of Emergency Medicine (AAEM)
- 2) American Academy of Neurology (AAN)
- 3) American Association of Neurological Surgeons (AANS)
- 4) American Association for the Surgery of Trauma (AAST)
- 5) American College of Emergency Physicians (ACEP)
- 6) Australasian College for Emergency Medicine (ACEM)
- 7) American College of Sports Medicine (ACSM)
- 8) American Medical Society for Sports Medicine (AMSSM)
- 9) American Neurological Association (ANA)
- 10) Australian and New Zealand Association of Neurologists (ANZAN)
- 11) Canadian Association of Emergency Physicians (CAEP)
- 12) Congress of Neurological Surgeons (CNS)
- 13) European Neurological Society (ENS)
- 14) International Brain Injury Association (IBIA)
- 15) International Symposium on Intensive Care and Emergency Medicine (ISICEM)
- 16) Society for Academic Emergency Medicine (SAEM)
- 17) Société de Neuropsychologie de Langue Française (SNLF)
- 18) World Congress on Brain Injury
- 19) World Congress of Neurology (WCN)

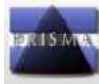

# PRISMA 2009 Checklist

| Section/topic                      | #  | Checklist item                                                                                                                                                                                                                                                                                              | Reported on page # |
|------------------------------------|----|-------------------------------------------------------------------------------------------------------------------------------------------------------------------------------------------------------------------------------------------------------------------------------------------------------------|--------------------|
| <b>TITLE</b>                       |    |                                                                                                                                                                                                                                                                                                             |                    |
| Title                              | 1  | Identify the report as a systematic review, meta-analysis, or both.                                                                                                                                                                                                                                         | 1                  |
| <b>ABSTRACT</b>                    |    |                                                                                                                                                                                                                                                                                                             |                    |
| Structured summary                 | 2  | Provide a structured summary including, as applicable: background; objectives; data sources; study eligibility criteria, participants, and interventions; study appraisal and synthesis methods; results; limitations; conclusions and implications of key findings; systematic review registration number. | 3                  |
| <b>INTRODUCTION</b>                |    |                                                                                                                                                                                                                                                                                                             |                    |
| Rationale                          | 3  | Describe the rationale for the review in the context of what is already known.                                                                                                                                                                                                                              | 4                  |
| Objectives                         | 4  | Provide an explicit statement of questions being addressed with reference to participants, interventions, comparisons, outcomes, and study design (PICOS).                                                                                                                                                  | 4                  |
| <b>METHODS</b>                     |    |                                                                                                                                                                                                                                                                                                             |                    |
| Protocol and registration          | 5  | Indicate if a review protocol exists, if and where it can be accessed (e.g., Web address), and, if available, provide registration information including registration number.                                                                                                                               | 5                  |
| Eligibility criteria               | 6  | Specify study characteristics (e.g., PICOS, length of follow-up) and report characteristics (e.g., years considered, language, publication status) used as criteria for eligibility, giving rationale.                                                                                                      | 5                  |
| Information sources                | 7  | Describe all information sources (e.g., databases with dates of coverage, contact with study authors to identify additional studies) in the search and date last searched.                                                                                                                                  | 5                  |
| Search                             | 8  | Present full electronic search strategy for at least one database, including any limits used, such that it could be repeated.                                                                                                                                                                               | 5 – eTable 1       |
| Study selection                    | 9  | State the process for selecting studies (i.e., screening, eligibility, included in systematic review, and, if applicable, included in the meta-analysis).                                                                                                                                                   | 5                  |
| Data collection process            | 10 | Describe method of data extraction from reports (e.g., piloted forms, independently, in duplicate) and any processes for obtaining and confirming data from investigators.                                                                                                                                  | 5-6                |
| Data items                         | 11 | List and define all variables for which data were sought (e.g., PICOS, funding sources) and any assumptions and simplifications made.                                                                                                                                                                       | 5-6                |
| Risk of bias in individual studies | 12 | Describe methods used for assessing risk of bias of individual studies (including specification of whether this was done at the study or outcome level), and how this information is to be used in any data synthesis.                                                                                      | 6                  |
| Summary measures                   | 13 | State the principal summary measures (e.g., risk ratio, difference in means).                                                                                                                                                                                                                               | 6                  |
| Synthesis of results               | 14 | Describe the methods of handling data and combining results of studies, if done, including measures of consistency (e.g., $I^2$ for each meta-analysis)                                                                                                                                                     | 6                  |

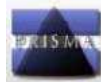

# PRISMA 2009 Checklist

Page 1 of 2

| Section/topic                 | #  | Checklist item                                                                                                                                                                                           | Reported on page # |
|-------------------------------|----|----------------------------------------------------------------------------------------------------------------------------------------------------------------------------------------------------------|--------------------|
| Risk of bias across studies   | 15 | Specify any assessment of risk of bias that may affect the cumulative evidence (e.g., publication bias, selective reporting within studies).                                                             | —                  |
| Additional analyses           | 16 | Describe methods of additional analyses (e.g., sensitivity or subgroup analyses, meta-regression), if done, indicating which were pre-specified.                                                         | —                  |
| <b>RESULTS</b>                |    |                                                                                                                                                                                                          |                    |
| Study selection               | 17 | Give numbers of studies screened, assessed for eligibility, and included in the review, with reasons for exclusions at each stage, ideally with a flow diagram.                                          | 6                  |
| Study characteristics         | 18 | For each study, present characteristics for which data were extracted (e.g., study size, PICOS, follow-up period) and provide the citations.                                                             | 6                  |
| Risk of bias within studies   | 19 | Present data on risk of bias of each study and, if available, any outcome level assessment (see item 12).                                                                                                | —                  |
| Results of individual studies | 20 | For all outcomes considered (benefits or harms), present, for each study: (a) simple summary data for each intervention group (b) effect estimates and confidence intervals, ideally with a forest plot. | 6-7                |
| Synthesis of results          | 21 | Present results of each meta-analysis done, including confidence intervals and measures of consistency.                                                                                                  | 6-7                |
| Risk of bias across studies   | 22 | Present results of any assessment of risk of bias across studies (see Item 15).                                                                                                                          | —                  |
| Additional analysis           | 23 | Give results of additional analyses, if done (e.g., sensitivity or subgroup analyses, meta-regression [see Item 16]).                                                                                    | —                  |
| <b>DISCUSSION</b>             |    |                                                                                                                                                                                                          |                    |
| Summary of evidence           | 24 | Summarize the main findings including the strength of evidence for each main outcome; consider their relevance to key groups (e.g., healthcare providers, users, and policy makers).                     | 7                  |
| Limitations                   | 25 | Discuss limitations at study and outcome level (e.g., risk of bias), and at review-level (e.g., incomplete retrieval of identified research, reporting bias).                                            | 9                  |
| Conclusions                   | 26 | Provide a general interpretation of the results in the context of other evidence, and implications for future research.                                                                                  | 9                  |
| <b>FUNDING</b>                |    |                                                                                                                                                                                                          |                    |
| Funding                       | 27 | Describe sources of funding for the systematic review and other support (e.g., supply of data); role of funders for the systematic review.                                                               | 10                 |

From: Moher D, Liberati A, Tetzlaff J, Altman DG, The PRISMA Group (2009). Preferred Reporting Items for Systematic Reviews and Meta-Analyses: The PRISMA Statement. PLoS Med 6(7): e1000097. doi:10.1371/journal.pmed1000097

For more information, visit: [www.prisma-statement.org](http://www.prisma-statement.org).

Page 2 of 2

For peer review only - <http://bmjopen.bmj.com/site/about/guidelines.xhtml>

1  
2  
3  
4  
5  
6  
7  
8  
9  
10  
11  
12  
13  
14  
15  
16  
17  
18  
19  
20  
21  
22  
23  
24  
25  
26  
27  
28  
29  
30  
31  
32  
33  
34  
35  
36  
37  
38  
39  
40  
41  
42  
43  
44  
45  
46  
47  
48  
49  
50  
51  
52  
53  
54  
55  
56  
57  
58  
59  
60

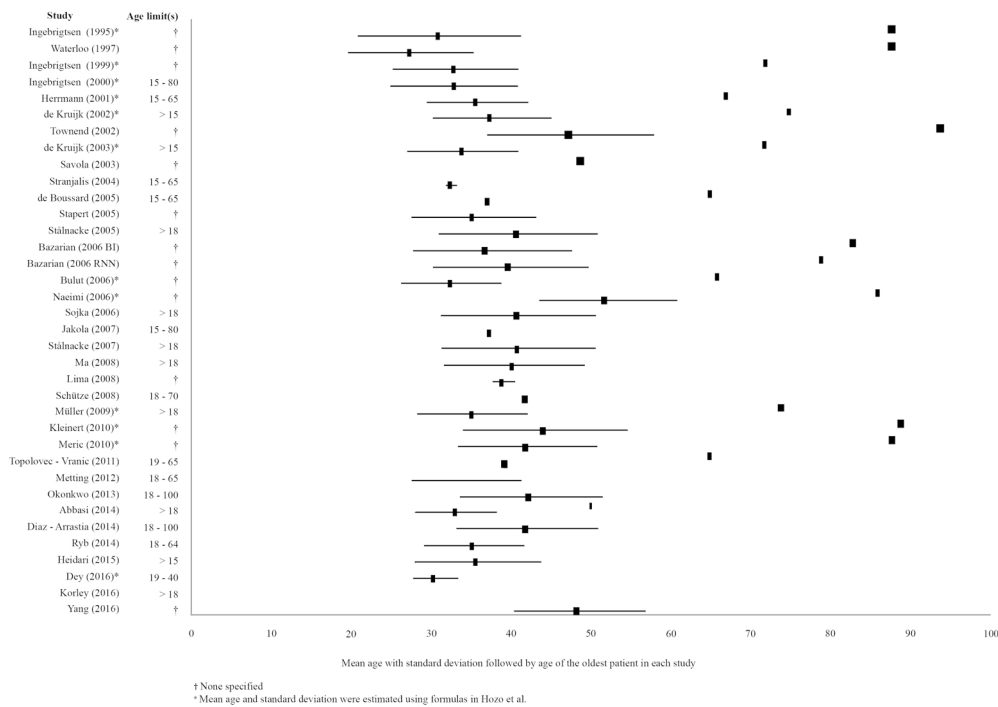

170x118mm (300 x 300 DPI)

# BMJ Open

## Characteristics of patients included and enrolled in studies on the prognostic value of serum biomarkers for prediction of post-concussion symptoms following a mild traumatic brain injury: A systematic review

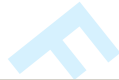

|                                 |                                                                                                                                                                                                                                                                                                                                                                                                                                                                                                                                                                                                                                                                                                                                                                                                                                                                                                                                                                                                                                                                                                                                                                                                                                                                                                                                                                                                                                                                                                                                                                                                                                                                                                                   |
|---------------------------------|-------------------------------------------------------------------------------------------------------------------------------------------------------------------------------------------------------------------------------------------------------------------------------------------------------------------------------------------------------------------------------------------------------------------------------------------------------------------------------------------------------------------------------------------------------------------------------------------------------------------------------------------------------------------------------------------------------------------------------------------------------------------------------------------------------------------------------------------------------------------------------------------------------------------------------------------------------------------------------------------------------------------------------------------------------------------------------------------------------------------------------------------------------------------------------------------------------------------------------------------------------------------------------------------------------------------------------------------------------------------------------------------------------------------------------------------------------------------------------------------------------------------------------------------------------------------------------------------------------------------------------------------------------------------------------------------------------------------|
| Journal:                        | <i>BMJ Open</i>                                                                                                                                                                                                                                                                                                                                                                                                                                                                                                                                                                                                                                                                                                                                                                                                                                                                                                                                                                                                                                                                                                                                                                                                                                                                                                                                                                                                                                                                                                                                                                                                                                                                                                   |
| Manuscript ID                   | bmjopen-2017-017848.R1                                                                                                                                                                                                                                                                                                                                                                                                                                                                                                                                                                                                                                                                                                                                                                                                                                                                                                                                                                                                                                                                                                                                                                                                                                                                                                                                                                                                                                                                                                                                                                                                                                                                                            |
| Article Type:                   | Research                                                                                                                                                                                                                                                                                                                                                                                                                                                                                                                                                                                                                                                                                                                                                                                                                                                                                                                                                                                                                                                                                                                                                                                                                                                                                                                                                                                                                                                                                                                                                                                                                                                                                                          |
| Date Submitted by the Author:   | 21-Jul-2017                                                                                                                                                                                                                                                                                                                                                                                                                                                                                                                                                                                                                                                                                                                                                                                                                                                                                                                                                                                                                                                                                                                                                                                                                                                                                                                                                                                                                                                                                                                                                                                                                                                                                                       |
| Complete List of Authors:       | <p>Mercier, Eric; Axe Santé des Populations et Pratiques Optimales en Santé, Unité de recherche en Traumatologie - Urgence - Soins Intensifs, Centre de recherche du CHU de Québec, Université Laval; Département de Médecine Familiale et Médecine d'Urgence, Faculté de Médecine, Université Laval</p> <p>Tardif, Pier-Alexandre; Axe Santé des Populations et Pratiques Optimales en Santé, Unité de recherche en Traumatologie - Urgence - Soins Intensifs, Centre de recherche du CHU de Québec, Université Laval</p> <p>Emond, Marcel; Département de Médecine Familiale et Médecine d'Urgence, Faculté de Médecine, Université Laval; Axe Santé des Populations et Pratiques Optimales en Santé, Unité de recherche en Vieillesse, Centre de recherche du CHU de Québec, Université Laval</p> <p>Ouellet, Marie-Christine; Centre Interdisciplinaire de Recherche en Réadaptation et Intégration Sociale (CIRRIS)</p> <p>De Guise, Éline; Research-Institute, McGill University Health Centre; Centre de recherche interdisciplinaire en réadaptation du Montréal métropolitain (CRIR)</p> <p>Mitra, Biswadev; Emergency and Trauma Centre, The Alfred Hospital, Alfred Health; School of Public Health and Preventive Medicine, Monash University</p> <p>Cameron, Peter; Emergency and Trauma Centre, The Alfred Hospital, Alfred Health; School of Public Health and Preventive Medicine</p> <p>Le Sage, Natalie; Axe Santé des Populations et Pratiques Optimales en Santé, Unité de recherche en Traumatologie - Urgence - Soins Intensifs, Centre de recherche du CHU de Québec, Université Laval; Département de Médecine Familiale et Médecine d'Urgence, Faculté de Médecine, Université Laval</p> |
| <b>Primary Subject Heading</b>: | Epidemiology                                                                                                                                                                                                                                                                                                                                                                                                                                                                                                                                                                                                                                                                                                                                                                                                                                                                                                                                                                                                                                                                                                                                                                                                                                                                                                                                                                                                                                                                                                                                                                                                                                                                                                      |
| Secondary Subject Heading:      | Diagnostics, Emergency medicine                                                                                                                                                                                                                                                                                                                                                                                                                                                                                                                                                                                                                                                                                                                                                                                                                                                                                                                                                                                                                                                                                                                                                                                                                                                                                                                                                                                                                                                                                                                                                                                                                                                                                   |
| Keywords:                       | Traumatic brain injury, post-concussion symptoms, post-concussion syndrome, biomarkers, systematic review                                                                                                                                                                                                                                                                                                                                                                                                                                                                                                                                                                                                                                                                                                                                                                                                                                                                                                                                                                                                                                                                                                                                                                                                                                                                                                                                                                                                                                                                                                                                                                                                         |
|                                 |                                                                                                                                                                                                                                                                                                                                                                                                                                                                                                                                                                                                                                                                                                                                                                                                                                                                                                                                                                                                                                                                                                                                                                                                                                                                                                                                                                                                                                                                                                                                                                                                                                                                                                                   |

1  
2  
3  
4  
5  
6  
7  
8  
9  
10  
11  
12  
13  
14  
15  
16  
17  
18  
19  
20  
21  
22  
23  
24  
25  
26  
27  
28  
29  
30  
31  
32  
33  
34  
35  
36  
37  
38  
39  
40  
41  
42  
43  
44  
45  
46  
47  
48  
49  
50  
51  
52  
53  
54  
55  
56  
57  
58  
59  
60

SCHOLARONE™  
Manuscripts

For peer review only

**Title**

Characteristics of patients included and enrolled in studies on the prognostic value of serum biomarkers for prediction of post-concussion symptoms following a mild traumatic brain injury: A systematic review

**Authors**

Eric Mercier<sup>1, 2, 3, 4</sup>

Pier-Alexandre Tardif<sup>1</sup>

Marcel Emond<sup>2, 6</sup>

Marie-Christine Ouellet<sup>7</sup>

Élaine de Guise<sup>8,9</sup>

Biswadev Mitra<sup>3, 4, 5</sup>

Peter A. Cameron<sup>3, 4, 5</sup>

Natalie Le Sage<sup>1, 2</sup>

**Affiliations**

1. Axe Santé des Populations et Pratiques Optimales en Santé, Unité de recherche en Traumatologie - Urgence - Soins Intensifs, Centre de recherche du CHU de Québec, Université Laval, Québec, Canada

2. Département de Médecine Familiale et Médecine d'Urgence, Faculté de Médecine, Université Laval, Québec, Canada

3. Emergency and Trauma Centre, The Alfred Hospital, Alfred Health, Australia

4. School of Public Health and Preventive Medicine, Monash University, Australia

5. National Trauma Research Institute, The Alfred Hospital, Melbourne, VIC, Australia

6. Axe Santé des Populations et Pratiques Optimales en Santé, Unité de recherche en Vieillesse, Centre de recherche du CHU de Québec, Université Laval, Québec, Canada

7. Centre Interdisciplinaire de Recherche en Réadaptation et Intégration Sociale (CIRRIS), Québec, Québec, Canada

8. Research-Institute, McGill University Health Centre, Montreal, Quebec, Canada

9. Centre de recherche interdisciplinaire en réadaptation du Montréal métropolitain (CRIR), Montréal, Québec, Canada.

**Correspondence to**

Eric Mercier

Université Laval

1  
2  
3  
4  
5  
6  
7  
8  
9  
10  
11  
12  
13  
14  
15  
16  
17  
18  
19  
20  
21  
22  
23  
24  
25  
26  
27  
28  
29  
30  
31  
32  
33  
34  
35  
36  
37  
38  
39  
40  
41  
42  
43  
44  
45  
46  
47  
48  
49  
50  
51  
52  
53  
54  
55  
56  
57  
58  
59  
60

Centre de recherche du CHU de Québec  
1401, 18<sup>e</sup> rue, Québec, QC, Canada, G1J 1Z4  
Telephone number: 418-649-0252 ext. 65277  
Fax number: 418-649-5975  
Eric.mercier.2@ulaval.ca

For peer review only



## ABSTRACT

**Objective:** Mild traumatic brain injury (mTBI) has been insufficiently researched and its definition remains elusive. Investigators are confronted by heterogeneity in patients, mechanism of injury and outcomes. Findings are thus often limited in generalizability and clinical application. Serum protein biomarkers are increasingly assessed to enhance prognostication of outcomes but their translation into clinical practice has yet to be achieved. A systematic review was performed to describe the adult populations included and enrolled in studies that evaluated the prognostic value of protein biomarkers to predict post-concussion symptoms following a mTBI. **Data sources:** Searches of MEDLINE, EMBASE, CENTRAL, CINAHL, Web of Science, PsycBITE, and PsycINFO up to October 2016. **Data selection and extraction:** Two reviewers independently screened for potentially eligible studies, extracted data and assessed the overall quality of evidence by outcome using the Grading of Recommendations Assessment, Development and Evaluation approach. **Results:** A total of 23,298 citations were obtained from which 166 manuscripts were reviewed. Thirty-six cohort studies (2,812 patients) having enrolled between 7 and 311 patients (median 89) fulfilled our inclusion criteria. Most studies excluded patients based on advanced age (n=10 (28%)), neurologic disorders (n=20 (56%)), psychiatric disorders (n=17 (47%)), substance abuse disorders (n=13 (36%)) or previous TBI (n=10 (28%)). Twenty-one studies (58%) used at least two of these exclusion criteria. The pooled mean age of included patients was 39.3 (SD 4.6) years old (34 studies). The criteria used to define a mTBI were inconsistent. The most frequently reported outcome was post-concussion syndrome (PCS) using the Rivermead Post-Concussion Symptoms Questionnaire (n=18 (50%)) with follow-ups ranging from 7 days to 5 years after the mTBI. **Conclusions:** Most studies have recruited samples that are not representative and generalizable to the mTBI population. These exclusion criteria limit the potential use and translation of promising serum protein biomarkers to predict post-concussion symptoms.

### Strengths and limitations of this study

- This systematic review on the characteristics of patients included and enrolled in studies on the prognostic value of serum protein biomarkers for prediction of post-concussion symptoms reports important findings for researchers planning their study and for clinicians interpreting the available data.
- Strengths of this systematic review include the exhaustive search strategy performed using seven databases, the selection and data extraction conducted independently by two researchers and the registration beforehand in the Prospero database of the study protocol.
- This study is limited by the quality of the included studies as well as the unavailability of some relevant data such as some studies inclusion criteria, exclusion criteria and clear patient demographic data.

## INTRODUCTION

Mild traumatic brain injury (mTBI) is frequently encountered by neurologists, primary care, emergency, sport medicine and rehabilitation health providers<sup>1</sup> and accounts for approximately 80% of all TBI.<sup>2</sup> The incidence of mTBI exceeds that of dementia, epilepsy and stroke, giving it the status of the most common brain disorder.<sup>3</sup> However, there is still an incomplete understanding of mTBI pathophysiology that leads to suboptimal diagnosis, treatment and prognostication.<sup>4</sup> With increasing attendance to Emergency Departments (ED) following mTBI by complex patients such as elderly,<sup>5</sup> intoxicated patients<sup>6,7</sup> and patients with psychiatric disorders,<sup>8</sup> there is an urgent need to optimise the care of mTBI patients.

Once considered benign, there has been increased awareness of the potential adverse consequences of mTBI.<sup>9</sup> While 80% of patients will report at least one early post-concussion symptom,<sup>10</sup> between 10% and 56% will exhibit persistent symptoms 3 months after a mTBI.<sup>11-15</sup> Physical, cognitive, and emotional symptoms, often described as post-concussion syndrome (PCS), that exceed the expected window of recovery have deleterious impacts on quality of life and daily functional outcome.<sup>16-18</sup> Prognostic markers have been highlighted for cognitive, psychiatric, and mortality outcomes.<sup>19</sup> However, the authors acknowledged that evidence regarding psychiatric and mortality outcomes is limited, and that little evidence exist concerning the role of biological markers in predicting the persistence of cognitive impairment after mTBI.<sup>19</sup> Under these conditions, there is still a need to develop objective assessment and prognostication tools. Novel brain specific serum protein biomarkers have been studied to assist the prognostic evaluation after mTBI but the translation of protein biomarker research into clinical practice to predict PCS is still pending.

Unfortunately, research in mTBI is beset with methodological challenges. Researchers are confronted with substantial heterogeneity of patients, various mechanisms of injury and a wide range of potential outcomes.<sup>20,21</sup> Therefore, many researchers choose to apply strict inclusion and exclusion criteria to minimize confounding by such factors and to decrease the inherent population heterogeneity.<sup>20</sup> This approach results in improved internal validity but also inevitably limits recruitment and generalizability of results. Some populations are therefore often excluded or less likely to be enrolled in TBI studies.<sup>22</sup> Furthermore, many methodological concerns regarding mTBI studies such as the inconsistency in mTBI definitions and the frequent inadequacy of outcome measures were highlighted in the recent synthesis performed by the International Collaboration on mTBI prognosis.<sup>23</sup> All these methodological issues further limit the translation to bedside care and might be applicable to research in the field of brain specific biomarkers following a mTBI. Identifying which patients are not enrolled and how often they are excluded from these studies will allow to underline the generalisability of this literature and highlight gaps that future researches should aim to fill.

This systematic review aims to describe populations included or enrolled in studies on the prognostic value of protein biomarkers for prediction of post-concussion symptoms following a mTBI. The secondary objectives are to describe the mTBI definition applied in these studies as well as the outcomes evaluated.

## METHODS

### Search strategy

1  
2  
3 A systematic review was performed to determine the prognostic value of protein biomarkers to  
4 predict the occurrence of post-concussion symptoms following a mTBI (International Prospective  
5 Register of Systematic Reviews (PROSPERO) registration CRD42016032578). In summary, a  
6 general search strategy aiming to identify articles which assessed the association between  
7 protein biomarkers and post-concussion symptoms in TBI was created for seven databases (from  
8 their inception to October 4, 2016): MEDLINE, EMBASE, CINAHL, Cochrane Central Register of  
9 Controlled Trials, Web of Science, PsycBITE and PsycINFO using MeSH terms, Emtree terms  
10 and keywords for their respective database. This research used a general strategy with an  
11 additional focus on seven of the most studied and promising protein biomarkers (S-100 $\beta$  protein,  
12 neuron-specific enolase (NSE), glial fibrillary acidic protein (GFAP), ubiquitin carboxy-terminal  
13 hydrolase L1 (UCHL-1), cleaved tau (c-tau), microRNA, and brain-derived neurotrophic factor  
14 (BDNF)).<sup>24-28</sup> No language, type of study or date restriction were applied in the initial search  
15 strategy. The detailed EMBASE search strategy is available in Appendix 1. References from the  
16 included studies and narrative reviews were also scrutinized and relevant abstracts from  
17 congress and conferences were reviewed to identify potential peer-reviewed published  
18 studies. (Appendix 2) Authors of potentially relevant abstracts were contacted to identify  
19 potentially published studies not identified with our search strategies.  
20  
21

## 22 23 24 **Study selection**

25  
26 Using EndNote (Thomson Reuters, version X7), all the citations obtained with our search  
27 strategies on the seven databases were combined. Duplicates were removed. Independently, two  
28 reviewers (EM, PAT) then scrutinized all citations and consecutively excluded studies using the  
29 title and abstract. Manuscripts of all potentially included studies were obtained. Studies in other  
30 language than English or French were translated into English. A third researcher (NL) was  
31 involved in case of disagreement and was responsible for the final decision regarding the  
32 inclusion of a study.  
33

34  
35 Studies were considered eligible for inclusion when they reported the association between at  
36 least one serum protein biomarker level and at least one post-concussion symptom evaluated  $\geq 7$   
37 days following a mTBI. This duration was chosen to ensure that the outcomes represented a  
38 prognostic measure instead of a diagnostic evaluation. This study was limited to the adult ( $> 16$   
39 years old) population. Studies were excluded if they were animal studies, case-report, specific to  
40 a paediatric population, reporting on moderate or severe TBI unless specific data for mTBI  
41 patients could be extracted from the manuscript or by contacting the authors, post-concussion  
42 symptom evaluation was performed less  $< 7$  days after the mTBI or the study was not published  
43 in a peer-reviewed journal.  
44  
45

## 46 47 **Data extraction**

48  
49 Using a data collection form, two reviewers (EM, PAT) independently collected the relevant data  
50 from every included study. Therefore, data on the manuscript (journal, publication date, authors),  
51 study characteristics (period and methods of recruitment, country(ies), type of study, number of  
52 patients included and followed, number of hospitals involved, setting, inclusion and exclusion  
53 criteria, mTBI definition), protein biomarker (assays used and characteristics, detection limits,  
54 thresholds, timing of sampling, type of sampling (venous, capillary or arterial), number of  
55 samples), patient characteristics (age, gender, trauma mechanism, TBI severity) and the  
56 outcomes (outcome type, assessment timing, method of outcome assessment, including  
57 statistical analyses used to assess the association between protein biomarkers and outcomes)  
58  
59

1  
2  
3 were collected. When clarification or additional information was needed, the corresponding author  
4 of the included study was contacted via email (up to three attempts).  
5  
6  
7

## 8 9 **Statistical analysis and quality assessment**

10  
11 Descriptive statistics were used to describe the population included and enrolled in the studies.  
12 Measures of central tendency (means and medians) and dispersion (standard deviation (SD))  
13 were calculated using Statistical Analysis System software (SAS Institute, Cary, North Carolina, v.  
14 9.4). Main data are also presented as proportions. In 14 studies where sufficient data was  
15 available, we calculated the pooled mean age of enrolled patients and its heterogeneity ( $I^2$ ).<sup>29</sup> To  
16 be more inclusive, a pooled mean age was also calculated using a weighted average based on  
17 study sample size for 34 studies. Where possible, age mean and SD were estimated using  
18 formulae proposed by Hozo et al.<sup>30</sup>  
19

20  
21 The quality of the evidence of the three main outcomes was evaluated using the GRADE  
22 approach (post-concussion symptoms, GOS-E & GOS and return to work)<sup>31</sup>. Given the high  
23 heterogeneity of the outcomes evaluated and the scales used, no quality of evidence assessment  
24 was performed for the neuropsychological outcomes. This study is reported in accordance with  
25 the Preferred Reporting Items for Systematic Reviews and Meta-Analyses (PRISMA) Statement  
26 (see Appendix 3).<sup>32</sup>  
27  
28

## 29 30 **RESULTS**

### 31 32 **Characteristics of the included studies**

33  
34 After removal of duplicates, the search strategy yielded 23,298 unique citations. Following the  
35 assessment of titles and abstracts using our inclusion and exclusion criteria, a total of 166  
36 manuscripts were reviewed (Figure 1). Thirty-six manuscripts fulfilled our criteria and were  
37 included in the present study (Table 1). Only one disagreement between the reviewers required  
38 the third researcher (NL) to make the final decision. A total of 2,812 patients were included in  
39 those studies, which individually included from seven to 311 patients (mean 104 (SD 62), median  
40 89). Twenty-one studies were conducted in Europe while eight were from North America, six from  
41 Asia and one was from South America. Two studies were in German and were fully translated in  
42 English. Only eight studies (22%) evaluated patients from multiple centres. The most frequent  
43 protein biomarker studied was the S-100 $\beta$  protein (29 studies) followed by NSE (10 studies), C-  
44 tau (four studies), GFAP (four studies), UCHL-1 (three studies), BDNF (one study) and microRNA  
45 (one study).  
46  
47

### 48 49 **Inclusion and exclusion criteria in the included studies**

50 Age limits criteria and the age of the patients enrolled in the studies are illustrated in the eFigure  
51 1. Regarding the inclusion criteria, an upper age limit was used in 10 studies (28%). Therefore,  
52 patients  $\geq 65$  years old were excluded in seven studies (19%) while those aged  $\geq 85$  years old  
53 were excluded in three more studies (total 10 studies, 28%). Across studies, the oldest patient  
54 enrolled ranged from 40 to 94 years old. The pooled mean age in the 14 studies with data on SD  
55 was 38.7 (SD 5.3) years old (18 studies) and was highly heterogeneous ( $I^2$  97%). In 34 studies,  
56 the pooled mean age was 39.3 (SD 4.6) years old.  
57  
58  
59  
60

1  
2  
3 The most frequent exclusion criteria were neurologic disorders, psychiatric disorders, trauma to  
4 another body region, substance abuse disorders and previous TBI (Table 2). Twenty-one studies  
5 (58%) used at least two of these exclusion criteria. Medical comorbidities were infrequently used  
6 as exclusion criteria. Ten studies (28%) did not report any exclusion criteria and were therefore  
7 considered as having no exclusion criteria.  
8

### 9 10 **Mild traumatic brain injury definitions in the included studies**

11 The mTBI definitions used were not standardised (Table 3). The Glasgow Coma Scale (GCS)  
12 was a criterion in 31 studies (86%) using either GCS 13-15 (23 studies (64%)), GCS 14-15  
13 (seven studies (19%)) or GCS 15 only (one study (3%)). Other criteria such as loss of  
14 consciousness (LOC), post-traumatic amnesia (PTA) and focal neurologic deficit were  
15 inconsistently used to define mTBI. Three (8.3%), six (16.7%), and one (2.8%) studies used  
16 definitions promoted by the American College of Emergency Physician/Centers for Disease  
17 Control and Prevention,<sup>33</sup> the American Congress of Rehabilitation Medicine,<sup>34</sup> and the European  
18 Federation of Neurological Societies,<sup>35</sup> respectively.  
19

### 20 21 **Outcomes presented in the included studies**

22 Table 4 presents the outcomes evaluated. The most frequently evaluated outcome was post-  
23 concussion syndrome (PCS) in 18 studies (50%). The Rivermead Post-Concussion Symptoms  
24 Questionnaire was the most used scale. Table 5 presents the number of symptoms required to  
25 define the presence of a PCS in the different studies. The number of symptoms used to define a  
26 positive PCS ranged between one and five with only 10 studies (28%) using  $\geq 3$  criteria. Among  
27 the 36 studies, there were 48 outcome evaluations and the duration between the mTBI and the  
28 outcome assessment was  $> 3$  months in only 22 (46%) of them. Six studies used outcomes that  
29 were unlikely to detect subtle impairment after a mTBI such as the Glasgow Outcome Scale  
30 (GOS) or the GOS-Extended (GOS-E).<sup>36</sup>  
31

### 32 33 **Assessment of outcomes in the included studies**

34 Half of studies used multivariate regression models to assess the association between protein  
35 biomarkers at the initial visit and the presence of outcomes at follow-up. Eleven studies (30.5%)  
36 used AUROC (Area Under the Receiver Operating Characteristic curve) analyses to assess the  
37 potential prognostic value of biomarkers to predict the occurrence of outcomes in patients with a  
38 mTBI. Among these, only one compared the AUC obtained using the protein biomarker alone to  
39 that obtained with a multivariate model including clinical factors.  
40

### 41 42 **Quality of the evidence**

43 Using the GRADE approach, the quality of evidence was evaluated as low or insufficient for the  
44 most frequently studied outcomes (Table 6). Various neuropsychological assessments were  
45 grouped together in Table 4 but given the heterogeneity of the neuropsychological tests used and  
46 the analytic methods, no GRADE assessment was performed for this outcome.  
47

## 48 49 **DISCUSSION**

50 Our systematic review highlights the selected patient populations in previously published reports.  
51 Most studies have restricted the inclusion of patients based on advanced age (28%), neurologic  
52 disorders (56%), psychiatric disorders (47%), substance abuse disorders (36%) or previous TBI  
53 (28%). The mean age of enrolled patients was only 38.7 years old. There are also important  
54 variations in the definitions of mTBI and in outcomes evaluated. The criteria used to define the  
55 occurrence of a positive PCS using the Rivermead Post-Concussion Symptoms Questionnaire  
56 ranged between one and five symptoms. These results impact on the generalizability and clinical  
57 applicability of the study findings on protein biomarkers and other prognostic tools following mTBI.  
58  
59  
60

1  
2  
3  
4 The epidemiology of TBI has evolved with increasing numbers of complex patients consulting for  
5 their injury, such as elderly<sup>37</sup> and patients with substance abuse, psychiatric or neurologic  
6 disorders.<sup>6, 8</sup> Intoxicated patients also often present with altered conscious state raising the  
7 possibility of TBI and complicating initial clinical assessment.<sup>38, 39</sup> Patients with previous TBI are  
8 also of concern given the complications of repetitive TBI.<sup>40</sup> All these patients pose a challenge to  
9 the clinician in terms of assessment of injury severity and prognosis. Moreover, these pre-injury  
10 factors are known to predispose to the development of persistent post-concussion symptoms  
11 leading to poorer functional outcomes.<sup>41-45</sup> In a large retrospective cohort study of patients with  
12 suspected TBI, patients were frequently intoxicated with alcohol (20%) or had a psychiatric (25%)  
13 or neurologic disorders (25%).<sup>22</sup> These patients were excluded in respectively 25%, 47% and  
14 56% of the studies included in our systematic review. Moreover, geriatric patients represent a  
15 constantly growing proportion of the trauma population as the world is ageing.<sup>46, 47</sup> The absolute  
16 incidence of TBI among the geriatric patients is rising as a result of the increased life expectancy  
17 and mobility.<sup>5</sup> Advanced age was an exclusion criteria in 10 studies (28%) but the patients  
18 enrolled were mostly young with a mean age of only 38.7 (SD 5.3) years old. Recent large TBI  
19 epidemiologic studies<sup>48, 49</sup> showed that more than 40% of the mTBI population are older than 50  
20 years and the median age of patients is at least 44 years.<sup>5, 50</sup> Geriatric patients seems therefore  
21 underrepresented in our included studies despite the fact that they have a poorer functional  
22 outcome with an increased occurrence of post-concussion symptoms.<sup>51</sup> The effect of age on the  
23 circulating blood-based biomarker is controversial.<sup>52</sup> Geriatric patients often have medical  
24 comorbidities that can potentially impact the biomarker's production, metabolism and clearance  
25 thus altering its baseline circulating serum level and its release following a mTBI. Interestingly,  
26 patients with renal impairment were excluded in only three studies (8%) even though some  
27 medical comorbidities might represent a more robust exclusion criteria than age alone.  
28  
29  
30

31 Selection bias is common and strict enrolment criteria have been associated with exclusion of up  
32 to 95% of the general mTBI population.<sup>20, 22</sup> Therefore, patients with pre-morbid conditions remain  
33 poorly studied despite their unfavourable prognosis and increased risk of disabilities.<sup>41, 42</sup> Also, the  
34 association between the protein biomarker and the outcome in patients with pre-morbid  
35 conditions might differ from the association with healthier patients therefore limiting the potential  
36 to draw clinical conclusions. Future studies should aim to maximize the inclusion and the  
37 recruitment of these clinically relevant patients. To facilitate the inclusion of these patients,  
38 studies addressing the influence of age, intoxication and previous neurologic disorder on protein  
39 biomarker baseline level and the kinetic modelling of protein biomarker release in the serum  
40 following a mild TBI are required.  
41  
42

43 The definition of mTBI was widely variable between the studies often limiting the comparability of  
44 studies. While GCS was almost universally included as a criterion, other criteria such as PTA,  
45 LOC and neuroimaging results were inconsistently used. Mild TBI is a heterogeneous group with  
46 a wide range of "severity". The symptom-based GCS classification often fails to demonstrate the  
47 whole spectrum of severity. The diagnostic criteria can be unreliable and overlap many conditions  
48 such as dementia, delirium or intoxication and the presence of confounding factors during the  
49 initial assessment are frequent.<sup>8</sup>  
50

51 One major limitation to our understanding of mTBI is the lack of universal definition of the  
52 outcomes evaluated.<sup>53</sup> Most patients recover completely but for those affected by persistent  
53 symptoms, there are controversies about the nomenclature and definitions associated with post-  
54 concussion symptoms and PCS.<sup>54</sup> This is particularly noticeable in our systematic review as the  
55 diagnosis criteria of PCS was highly variable ranging from one to more than five criteria on the  
56 Rivermead Post-Concussion Symptoms Questionnaire to determine the presence or the absence  
57  
58  
59  
60

1  
2  
3 of PCS. The timing of outcome evaluation was also variable ranging from seven days to more  
4 than five years. PCS is a complex constellation of symptoms with a significant variability between  
5 individuals. Since most symptoms are subjective, there is a high risk of misdiagnosis<sup>55</sup> and we are  
6 still unable to predict the occurrence of PCS. Biomarkers are promising to help predict the  
7 recovery and the risk of persistent PCS but well-designed confirmatory studies that address the  
8 methodological limitations are needed to enhance our knowledge of mTBI consequences.<sup>19</sup> The  
9 lack of standardisation in the definition of the outcomes contributes to impede the translation from  
10 research to daily bedside care in the field of brain specific biomarkers. Another shortcoming that  
11 might partly explain the difficulty of using protein biomarkers to predict post-concussion symptoms  
12 are that these symptoms are not specific to mild TBI and are prevalent both in the general  
13 population and after non-head injuries.<sup>56</sup>  
14

15  
16 In addition to the aforementioned shortcomings, a methodological issue that possibly limits the  
17 translation of protein biomarkers from research to everyday care is the statistical methods used to  
18 assess the value of these biomarkers. Showing that a given protein biomarker sampled at the  
19 initial admission is correlated with outcomes at follow-up is certainly valuable, but this result in  
20 itself remains insufficient to inform patient management. Guidelines and clinical decision rules  
21 aiming to rule out unnecessary neuroimaging or to identify patients who are at high risk of  
22 experiencing persistent symptoms following their mTBI require operational tools. To this end,  
23 practicable information on the prognostic (discriminative) value of protein biomarkers is  
24 necessary. In our systematic review, only 30% of studies performed AUROC analyses and only  
25 one study compared the AUC obtained using the protein biomarker alone with that obtain with a  
26 multivariable model. Unless protein biomarkers are shown to add significant prognostic value over  
27 and above clinical factors readily available in clinical settings, they are unlikely to be integrated  
28 into daily clinical practice. However, there are numerous other potential benefits to study protein  
29 biomarkers after a mTBI.<sup>57</sup> In addition to improving the initial prognostication, the use of  
30 biomarkers could help making the diagnosis, determine more accurately the need for  
31 neuroimaging, evaluating the disease progression, determining the safe moment to return to sport  
32 or activities and might be used as a surrogate assessment tool for investigational treatments.<sup>26 27</sup>  
33 As mTBI diagnostic criteria are subjective, nonspecific and overlap other conditions, a biomarker  
34 level could alleviate the paucity around the initial presentation and represent an objective  
35 assessment tool.  
36  
37

### 38 39 **Strengths and limitations**

40  
41 Our study has several limitations. We looked both at the characteristics of the inclusion/exclusion  
42 criteria and the patients enrolled. The absence of exclusion criteria does not mean that some  
43 subgroups of patient will be enrolled and often studies failed to present the number of patients  
44 screened and approached to be enrolled. Therefore, we can expect that our review  
45 underestimates the poor representation of subgroups such as patients with substance abuse,  
46 psychiatric and neurologic disorders. Ten studies did not report any exclusion criteria and were  
47 considered as having no exclusion criteria but this might be a misinterpretation thus making the  
48 underestimation even more likely. We have however used high methodological standards to  
49 perform our systematic review. We have completed an exhaustive unrestricted search strategy  
50 using seven databases and screened 23,298 citations. Studies were researched and data were  
51 extracted independently by two reviewers. This study is reported in accordance with the  
52 recommended PRISMA Statement.  
53  
54

### 55 56 57 **CONCLUSION**

1  
2  
3  
4 The patients included and enrolled in studies on the prognostic value of protein biomarkers  
5 following mTBI are not representative of the mTBI population. Subgroups such as elderly,  
6 patients with neurologic, psychiatric and substance abuse disorders and patients with previous  
7 TBI are often excluded and poorly represented even though they are at high risk of post-  
8 concussion symptoms and associated disabilities. The lack of standardisation of definitions  
9 further impedes the translation from research to everyday patient care. Broader inclusion criteria  
10 and standardised definitions, particularly mTBI and PCS, are required to maximise the  
11 generalizability and the translation to bedside care of the promising brain specific biomarkers.  
12  
13

14  
15 **Contributors** EM has had the original idea for this study. EM, PAT and NL conceived the study's  
16 design and protocol with support, input and oversight from ME, MCO, EDG, BM and PAC. EM  
17 and PAT elaborated the original database search strategy. EM and PAT performed the study  
18 selection and data extraction with oversight from ME, MCO, EDG, PAC and NL. PAT prepared  
19 the data for statistical analysis. Statistical analysis plan was elaborated by ME, BM and NL. EM  
20 and PAT wrote the manuscript first draft. All authors contributed to the manuscript revision and  
21 they all approved the final submitted version. All authors are accountable for all aspects of this  
22 study.  
23

24  
25 **Funding** Natalie Le Sage has received a grant from le Fonds de Recherche du Québec – Santé  
26 (FRQ-S #30598, Consortium pour le développement de la recherche en traumatologie – Volet 4).  
27 Eric Mercier has obtained a fellowship in clinical research grant from FRQ-S (#32058).  
28

29 **Competing interests** None declared.  
30

31 **Data sharing statement:** No additional data are available.  
32  
33  
34  
35  
36  
37  
38  
39  
40  
41  
42  
43  
44  
45  
46  
47  
48  
49  
50  
51  
52  
53  
54  
55  
56  
57  
58  
59  
60



## Tables

Table 1. Characteristics of included studies

| First author                   | Year of study publication | Countries               | Number of hospitals | Number of patients included | Biomarkers assessed      | Multivariate* AUROC† |
|--------------------------------|---------------------------|-------------------------|---------------------|-----------------------------|--------------------------|----------------------|
| Ingebrigtsen <sup>58</sup>     | 1995                      | Norway                  | 1                   | 50                          | S-100β                   | x/x                  |
| Waterloo <sup>59</sup>         | 1997                      | Norway                  | 1                   | 7                           | S-100β                   | x/x                  |
| Ingebrigtsen <sup>60</sup>     | 1999                      | Norway                  | 1                   | 50                          | S-100β                   | x/x                  |
| Ingebrigtsen <sup>61</sup>     | 2000                      | Norway, Sweden, Denmark | 3                   | 182                         | S-100β                   | x/x                  |
| Herrmann <sup>62</sup>         | 2001                      | Germany                 | 1                   | 69                          | S-100β, NSE              | ✓/✓                  |
| de Kruijk <sup>63</sup>        | 2002                      | Netherlands             | 1                   | 107                         | S-100β, NSE              | ✓/x                  |
| Townend <sup>64</sup>          | 2002                      | United Kingdom          | 4                   | 148                         | S-100β                   | ✓/✓                  |
| de Kruijk <sup>65</sup>        | 2003                      | Netherlands             | 1                   | 111                         | S-100β, NSE              | ✓/x                  |
| Savola <sup>66</sup>           | 2003                      | Finland                 | 1                   | 199                         | S-100β                   | ✓/✓                  |
| Stranjalis <sup>67</sup>       | 2004                      | Greece                  | 1                   | 100                         | S-100β                   | ✓/✓                  |
| de Boussard <sup>68</sup>      | 2005                      | Sweden                  | 3                   | 122                         | S-100β                   | x/x                  |
| Stålnacke <sup>69</sup>        | 2005                      | Sweden                  | 1                   | 88                          | S-100β, NSE              | ✓/x                  |
| Stapert <sup>70</sup>          | 2005                      | Netherlands             | 1                   | 50                          | S-100β                   | x/x                  |
| Bazarian <sup>71</sup>         | 2006 (BI)                 | USA                     | 1                   | 35                          | S-100β, C-Tau            | x/✓                  |
| Bazarian <sup>72</sup>         | 2006 (RNN)                | USA                     | 1                   | 96                          | S-100β                   | x/✓                  |
| Bulut <sup>73</sup>            | 2006                      | Turkey                  | 1                   | 60                          | C-Tau                    | x/x                  |
| Naeimi <sup>74</sup>           | 2006                      | Austria                 | 1                   | 45                          | S-100β, NSE              | x/x                  |
| Sojka <sup>75</sup>            | 2006                      | Sweden                  | 1                   | 98                          | S-100β, NSE              | ✓/x                  |
| Jakola <sup>76</sup>           | 2007                      | Norway                  | 3                   | 89                          | S-100β                   | ✓/x                  |
| Stålnacke <sup>77</sup>        | 2007                      | Sweden                  | 1                   | 69                          | S-100β, NSE              | ✓/x                  |
| Lima <sup>78</sup>             | 2008                      | Brazil                  | 1                   | 50                          | S-100β                   | x/x                  |
| Ma <sup>79</sup>               | 2008                      | USA                     | 1                   | 50                          | C-Tau                    | x/x                  |
| Schütze <sup>80</sup>          | 2008                      | Germany                 | 1                   | 74                          | S-100β, NSE              | ✓/x                  |
| Müller <sup>81</sup>           | 2009                      | Norway                  | 1                   | 93                          | S-100β                   | ✓/x                  |
| Kleinert <sup>82</sup>         | 2010                      | Germany                 | 1                   | 73                          | S-100β                   | x/x                  |
| Meric <sup>83</sup>            | 2010                      | Turkey                  | 1                   | 80                          | NSE                      | x/✓                  |
| Topolovec-Vranic <sup>84</sup> | 2011                      | Canada                  | 1                   | 141                         | S-100β, NSE              | ✓/✓                  |
| Metting <sup>85</sup>          | 2012                      | Netherlands             | 1                   | 94                          | S-100β, GFAP             | ✓/x                  |
| Okonkwo <sup>86</sup>          | 2013                      | USA                     | 3                   | 215                         | GFAP                     | ✓/✓                  |
| Abbasi <sup>87</sup>           | 2014                      | Iran                    | 2                   | 109                         | S-100β                   | x/x                  |
| Diaz-Arrastia <sup>88</sup>    | 2014                      | USA                     | 3                   | 206                         | GFAP, UCHL-1             | x/✓                  |
| Ryb <sup>89</sup>              | 2014                      | USA                     | 1                   | 150                         | S-100β                   | ✓/✓                  |
| Heidari <sup>90</sup>          | 2015                      | Iran                    | 1                   | 176                         | S-100β                   | ✓/x                  |
| Dey <sup>91</sup>              | 2016                      | India                   | 1                   | 20                          | S-100β, UCHL-1           | x/x                  |
| Korley <sup>28</sup>           | 2016                      | USA                     | 2                   | 311                         | C-Tau, GFAP, UCHL-1      | ✓/✓                  |
| Yang <sup>92</sup>             | 2016                      | China                   | 1                   | 76                          | miR-93, miR-191, miR-499 | x/x                  |

BI: Brain Injury; C-Tau: cleaved tau; BDNF: brain-derived neurotrophic factor; GFAP: glial fibrillary acidic protein; miR: micro ribonucleic acid; NSE: neuron specific enolase; RNN: Restorative Neurology and Neuroscience; UCHL-1: ubiquitin carboxy-terminal hydrolase L1; USA: United States of America.

\*The association between protein biomarker(s) and outcome(s) was assessed using a multivariate regression model; †The prognostic value of protein biomarker(s) was assessed using an Area Under the Receiver Operating Characteristic curve (AUROC).

**Table 2.** Exclusion criteria used in the included studies

| Exclusion criteria                                      | Number of studies (n, %) |
|---------------------------------------------------------|--------------------------|
| Neurologic disorder                                     | 20 (55.6)                |
| Psychiatric disorder                                    | 17 (47.2)                |
| Significant trauma to another body region than the head | 17 (47.2)                |
| Substance abuse (drug or alcohol)                       | 14 (38.8)                |
| Previous traumatic brain injury                         | 10 (27.8)                |
| Alcohol intoxication                                    | 9 (25)                   |
| Renal impairment                                        | 3 (8.3)                  |
| Cardiac disease                                         | 2 (5.6)                  |

For peer review only

**Table 3.** Criteria used to define mild traumatic brain injury (mTBI) in the included studies

| Criteria                                                                                     |               | Number of studies (n, %) |
|----------------------------------------------------------------------------------------------|---------------|--------------------------|
| Glasgow Coma Scale (GCS)                                                                     | 13-15         | 23 <sup>§</sup> (63.8)   |
|                                                                                              | 14-15         | 7 (19.4)                 |
|                                                                                              | 15            | 1 (2.8)                  |
|                                                                                              | NR            | 5 <sup>°</sup> (13.9)    |
| Loss of consciousness (LOC)                                                                  | < 10 minutes  | 4 (11.1)                 |
|                                                                                              | < 15 minutes  | 5 (13.9)                 |
|                                                                                              | < 30 minutes  | 9 <sup>§</sup> (25)      |
|                                                                                              | No duration   | 8 <sup>°</sup> (22.2)    |
|                                                                                              | No use of LOC | 10 (27.8)                |
| Post-traumatic amnesia (PTA)                                                                 | < 15 minutes  | 1 (2.8)                  |
|                                                                                              | < 30 minutes  | 0 (0)                    |
|                                                                                              | < 60 minutes  | 4 <sup>§</sup> (11.1)    |
|                                                                                              | < 24 hours    | 3 (8.3)                  |
|                                                                                              | No duration   | 7 <sup>°</sup> (19.4)    |
|                                                                                              | No use of PTA | 21 (58.3)                |
| Initial altered mental state                                                                 | Yes           | 3 (8.3)                  |
| Absence of focal neurology deficit                                                           | Yes           | 14 (38.9)                |
| Triaged to non-contrast head CT using the (ACEP/CDC) evidence-based joint practice guideline |               | 3 <sup>°</sup> (8.3)     |
| Use of the American Congress of Rehabilitation Medicine definition (1993)                    |               | 6 (16.7)                 |
| Use of European Federation of Neurological Societies (EFNS) definition (2002)                |               | 1 <sup>§</sup> (2.8)     |

\* ACEP: American College of Emergency Physicians; CDC: Centre for Disease Control; CT: Computed Tomography; TBI: Traumatic Brain Injury.

<sup>§</sup> Heidari et al. (2015)<sup>90</sup> used the following mTBI definition: (1) a GCS score of 13–14; (2) a GCS score of 15 with loss of consciousness (LOC) < 30 minutes, post-traumatic amnesia (PTA) < 1 hour; or (3) a GCS score of 15 without LOC or PTA.

<sup>°</sup> Korley et al. (2016)<sup>28</sup> presented 3 different cohorts with different inclusion criteria. Only the mTBI definition of the case cohort is presented in the table.

**Table 4.** Outcome evaluated in the included studies

| <b>Outcome evaluated</b>                                | <b>Number of studies (n, %)</b>           |
|---------------------------------------------------------|-------------------------------------------|
| Post-concussion syndrome                                | 18 (50)                                   |
| Neuropsychological evaluation                           | 9 (25)                                    |
| GOS-E; GOS                                              | 5 (13.8); 4 (11.1)                        |
| Return to work                                          | 4 (11.1)                                  |
| Headache                                                | 3 (8.3)                                   |
| Life satisfaction                                       | 2 (5.6)                                   |
| RHFUQ                                                   | 2 (5.6)                                   |
| Anxiety or depression                                   | 1 (2.7)                                   |
| Daily activity functioning                              | 1 (2.7)                                   |
| Olfactory function                                      | 1 (2.7)                                   |
| Post-traumatic related stress                           | 1 (2.7)                                   |
| Quality of life                                         | 1 (2.7)                                   |
| SF-36                                                   | 1 (2.7)                                   |
| <b>Duration between mild TBI and outcome assessment</b> | <b>Assessments (n=48 outcomes) (n, %)</b> |
| 7 days                                                  | 3 (6.3)                                   |
| 14 days                                                 | 6 (12.5)                                  |
| 1 month                                                 | 6 (12.5)                                  |
| 1.1-3 months                                            | 11 (23)                                   |
| 3.1-6 months                                            | 11 (23)                                   |
| 6.1-12 months                                           | 6 (12.5)                                  |
| 12.1-18 months                                          | 4 (8.2)                                   |
| > 18.1 months                                           | 1 (2)                                     |

GOS: Glasgow Outcome Scale; GOS-E: Glasgow Outcome Scale-Extended; RHFUQ: Rivermead Head Injury Follow-up Questionnaire; SF-36: Acute Medical Outcomes F6-36v2 Health Survey; TBI: traumatic brain injury.

**Table 5.** Definition of post-concussion syndrome (PCS)

| Scale used                                       | Number of positive symptoms to define the presence of a PCS | Number of studies (n, %) |
|--------------------------------------------------|-------------------------------------------------------------|--------------------------|
| Rivermead Post-Concussion Symptoms Questionnaire | $\geq 1$                                                    | 3 (17)                   |
|                                                  | $\geq 2$                                                    | 1 (5.5)                  |
|                                                  | $\geq 3$                                                    | 5 (28)                   |
|                                                  | $\geq 4$                                                    | 1 (5.5)                  |
|                                                  | $\geq 5$                                                    | 2 (11)                   |
|                                                  | Not specified                                               | 6 (33)                   |

For peer review only

**Table 6.** Outcomes quality of evidence according to the Grades of Recommendation, Assessment, Development, and Evaluation (GRADE) approach

| Outcomes                        | Number of studies (number of patients) | Design        | Findings and direction                                                                                                                                                                                                                                                                                                  | GRADE        |
|---------------------------------|----------------------------------------|---------------|-------------------------------------------------------------------------------------------------------------------------------------------------------------------------------------------------------------------------------------------------------------------------------------------------------------------------|--------------|
| <b>Post-concussion symptoms</b> | 18 studies (n=2048)                    | Observational | Important heterogeneity in populations enrolled, definitions of outcome variables, and evaluation duration. Only four associations between post-concussion symptoms and a biomarker were statistically significant. Only eight studies used multivariate regression analyses and confidence intervals were often large. | Low          |
| <b>GOS-E &amp; GOS</b>          | 9 studies (n=1235)                     | Observational | Slight discrepancies in definitions, wide differences in populations enrolled, methods quality as well as in evaluation duration, and inconsistencies in associations (only 3 were significant), their direction and strength.                                                                                          | Insufficient |
| <b>Return to work</b>           | 4 studies (n=432)                      | Observational | Slight discrepancies in definitions and reporting but considerable differences in evaluation duration (one week to one year). Only one study showed a significant association with increased S-100 $\beta$ protein serum level.                                                                                         | Insufficient |

GOS: Glasgow Outcome Scale; GOS-E: Glasgow Outcome Scale (GOS) Extended

## REFERENCES

1. Langlois JA, Marr A, Mitchko J, et al. Tracking the silent epidemic and educating the public: CDC's traumatic brain injury-associated activities under the TBI Act of 1996 and the Children's Health Act of 2000. *The Journal of head trauma rehabilitation* 2005;20(3):196-204. [published Online First: 2005/05/24]
2. Ruff R. Two decades of advances in understanding of mild traumatic brain injury. *The Journal of head trauma rehabilitation* 2005;20(1):5-18. [published Online First: 2005/01/26]
3. Mondello S, Schmid K, Berger RP, et al. The challenge of mild traumatic brain injury: role of biochemical markers in diagnosis of brain damage. *Medicinal research reviews* 2014;34(3):503-31. doi: 10.1002/med.21295 [published Online First: 2013/07/03]
4. Katz DI, Cohen SI, Alexander MP. Mild traumatic brain injury. *Handb Clin Neurol* 2015;127:131-56. doi: 10.1016/B978-0-444-52892-6.00009-X
5. Roozenbeek B, Maas AI, Menon DK. Changing patterns in the epidemiology of traumatic brain injury. *Nature reviews Neurology* 2013;9(4):231-6. doi: 10.1038/nrneurol.2013.22 [published Online First: 2013/02/28]
6. Brennan JH, Bernard S, Cameron PA, et al. Ethanol and isolated traumatic brain injury. *Journal of clinical neuroscience : official journal of the Neurosurgical Society of Australasia* 2015;22(9):1375-81. doi: 10.1016/j.jocn.2015.02.030 [published Online First: 2015/06/13]
7. Hamilton BH, Sheth A, McCormack RT, et al. Imaging of frequent emergency department users with alcohol use disorders. *J Emerg Med* 2014;46(4):582-7. doi: 10.1016/j.jemermed.2013.08.129
8. Furger RE, Nelson LD, Brooke Lerner E, et al. Frequency of Factors that Complicate the Identification of Mild Traumatic Brain Injury in Level I Trauma Center Patients. *Concussion* 2016;1(2) doi: 10.2217/cnc.15.11
9. McMillan TM, McSkimming P, Wainman-Lefley J, et al. Long-term health outcomes after exposure to repeated concussion in elite level: rugby union players. *Journal of Neurology, Neurosurgery & Psychiatry* 2016
10. Boake C, McCauley SR, Levin HS, et al. Diagnostic criteria for postconcussional syndrome after mild to moderate traumatic brain injury. *The Journal of neuropsychiatry and clinical neurosciences* 2005;17(3):350-6. doi: 10.1176/jnp.17.3.350 [published Online First: 2005/09/24]
11. Kashluba S, Paniak C, Blake T, et al. A longitudinal, controlled study of patient complaints following treated mild traumatic brain injury. *Archives of clinical neuropsychology : the official journal of the National Academy of Neuropsychologists* 2004;19(6):805-16. doi: 10.1016/j.acn.2003.09.005 [published Online First: 2004/08/04]
12. Holm L, Cassidy JD, Carroll LJ, et al. Summary of the WHO Collaborating Centre for Neurotrauma Task Force on Mild Traumatic Brain Injury. *J Rehabil Med* 2005;37(3):137-41. doi: 10.1080/16501970510027321
13. Fung M, Willer B, Moreland D, et al. A proposal for an evidenced-based emergency department discharge form for mild traumatic brain injury. *Brain injury* 2006;20(9):889-94. doi: 10.1080/02699050600831934
14. Meares S, Shores EA, Taylor AJ, et al. Mild traumatic brain injury does not predict acute postconcussion syndrome. *J Neurol Neurosurg Psychiatry* 2008;79(3):300-6. doi:

- 1  
2  
3 jnnp.2007.126565 [pii] 10.1136/jnnp.2007.126565 [published Online First:  
4 2007/08/19]  
5  
6 15. McLean SA, Kirsch NL, Tan-Schriner CU, et al. Health status, not head injury, predicts  
7 concussion symptoms after minor injury. *Am J Emerg Med* 2009;27(2):182-90. doi:  
8 10.1016/j.ajem.2008.01.054  
9  
10 16. Sirois MJ, Emond M, Ouellet MC, et al. Cumulative incidence of functional decline after  
11 minor injuries in previously independent older Canadian individuals in the  
12 emergency department. *Journal of the American Geriatrics Society* 2013;61(10):1661-  
13 8. doi: 10.1111/jgs.12482 [published Online First: 2013/10/15]  
14  
15 17. Ponsford J, Cameron P, Fitzgerald M, et al. Long-term outcomes after uncomplicated mild  
16 traumatic brain injury: a comparison with trauma controls. *J Neurotrauma*  
17 2011;28(6):937-46. doi: 10.1089/neu.2010.1516  
18  
19 18. Brousseau A-A, Émond M, Sirois M-J, et al. Comparison of functional outcomes in elderly  
20 who have sustained a minor trauma with or without head injury: a prospective  
21 multicenter cohort study. *CJEM* 2016;1-9. doi: 10.1017/cem.2016.368  
22  
23 19. Carroll LJ, Cassidy JD, Cancelliere C, et al. Systematic review of the prognosis after mild  
24 traumatic brain injury in adults: cognitive, psychiatric, and mortality outcomes:  
25 results of the International Collaboration on Mild Traumatic Brain Injury Prognosis.  
26 *Archives of physical medicine and rehabilitation* 2014;95(3 Suppl):S152-73. doi:  
27 10.1016/j.apmr.2013.08.300  
28  
29 20. Luoto TM, Tenovuo O, Kataja A, et al. Who gets recruited in mild traumatic brain injury  
30 research? *J Neurotrauma* 2013;30(1):11-6. doi: 10.1089/neu.2012.2611 [published  
31 Online First: 2012/08/23]  
32  
33 21. Maas AI, Marmarou A, Murray GD, et al. Clinical trials in traumatic brain injury: current  
34 problems and future solutions. *Acta Neurochir Suppl* 2004;89:113-8.  
35  
36 22. Isokuortti H, Iverson GL, Kataja A, et al. Who Gets Head Trauma or Recruited in Mild  
37 Traumatic Brain Injury Research? *Journal of neurotrauma* 2016;33(2):232-41. doi:  
38 10.1089/neu.2015.3888 [published Online First: 2015/06/10]  
39  
40 23. Kristman VL, Borg J, Godbolt AK, et al. Methodological issues and research  
41 recommendations for prognosis after mild traumatic brain injury: results of the  
42 International Collaboration on Mild Traumatic Brain Injury Prognosis. *Archives of*  
43 *physical medicine and rehabilitation* 2014;95(3 Suppl):S265-77. doi:  
44 10.1016/j.apmr.2013.04.026 [published Online First: 2014/03/04]  
45  
46 24. Begaz T, Kyriacou DN, Segal J, et al. Serum biochemical markers for post-concussion  
47 syndrome in patients with mild traumatic brain injury. *J Neurotrauma*  
48 2006;23(8):1201-10. doi: 10.1089/neu.2006.23.1201  
49  
50 25. Jeter CB, Hergenroeder GW, Hylin MJ, et al. Biomarkers for the diagnosis and prognosis of  
51 mild traumatic brain injury/concussion. *J Neurotrauma* 2013;30(8):657-70. doi:  
52 10.1089/neu.2012.2439  
53  
54 26. Zetterberg H, Smith DH, Blennow K. Biomarkers of mild traumatic brain injury in  
55 cerebrospinal fluid and blood. *Nature reviews Neurology* 2013;9(4):201-10. doi:  
56 10.1038/nrneurol.2013.9 [published Online First: 2013/02/13]  
57  
58 27. Kulbe JR, Geddes JW. Current status of fluid biomarkers in mild traumatic brain injury.  
59 *Experimental neurology* 2015 doi: 10.1016/j.expneurol.2015.05.004 [published  
60 Online First: 2015/05/20]



- 1  
2  
3 28. Korley FK, Diaz-Arrastia R, Wu AHB, et al. Circulating brain-derived neurotrophic factor  
4 has diagnostic and prognostic value in traumatic brain injury. *J Neurotrauma*  
5 2016;33(2):215-25. doi: 10.1089/neu.2015.3949  
6  
7 29. Neyeloff JL, Fuchs SC, Moreira LB. Meta-analyses and Forest plots using a microsoft excel  
8 spreadsheet: step-by-step guide focusing on descriptive data analysis. *BMC Res Notes*  
9 2012;5:52. doi: 10.1186/1756-0500-5-52  
10  
11 30. Hozo SP, Djulbegovic B, Hozo I. Estimating the mean and variance from the median,  
12 range, and the size of a sample. *BMC Med Res Methodol* 2005;5:13. doi: 10.1186/1471-  
13 2288-5-13  
14  
15 31. Atkins D, Best D, Briss PA, et al. Grading quality of evidence and strength of  
16 recommendations. *BMJ* 2004;328(7454):1490. doi: 10.1136/bmj.328.7454.1490  
17  
18 32. Liberati A, Altman DG, Tetzlaff J, et al. The PRISMA statement for reporting systematic  
19 reviews and meta-analyses of studies that evaluate healthcare interventions:  
20 explanation and elaboration. *BMJ* 2009;339:b2700. doi: 10.1136/bmj.b2700  
21 [published Online First: 2009/07/23]  
22  
23 33. Jagoda AS, Bazarian JJ, Bruns JJ, Jr., et al. Clinical policy: neuroimaging and  
24 decisionmaking in adult mild traumatic brain injury in the acute setting. *Annals of*  
25 *emergency medicine* 2008;52(6):714-48. doi: 10.1016/j.annemergmed.2008.08.021  
26 [published Online First: 2008/11/26]  
27  
28 34. American Congress of Rehabilitation. Definition of mild traumatic brain injury: Report of  
29 the Mild Traumatic Brain Injury Committee of the head Injury Interdisciplinary  
30 Special Interest Group of the American Congress of Rehabilitation Medicine. *Journal of*  
31 *Head Trauma Rehabilitation* 1993;8:86-87.  
32  
33 35. Vos PE, Battistin L, Birbamer G, et al. EFNS guideline on mild traumatic brain injury:  
34 report of an EFNS task force. *Eur J Neurol* 2002;9(3):207-19.  
35  
36 36. Levin HS, Boake C, Song J, et al. Validity and sensitivity to change of the extended Glasgow  
37 Outcome Scale in mild to moderate traumatic brain injury. *J Neurotrauma*  
38 2001;18(6):575-84. doi: 10.1089/089771501750291819  
39  
40 37. Albrecht JS, Hirshon JM, McCunn M, et al. Increased Rates of Mild Traumatic Brain Injury  
41 Among Older Adults in US Emergency Departments, 2009-2010. *The Journal of head*  
42 *trauma rehabilitation* 2015 doi: 10.1097/HTR.0000000000000190  
43  
44 38. Ronning P, Gunstad PO, Skaga NO, et al. The impact of blood ethanol concentration on the  
45 classification of head injury severity in traumatic brain injury. *Brain injury*  
46 2015;29(13-14):1648-53. doi: 10.3109/02699052.2015.1075154 [published Online  
47 First: 2015/10/20]  
48  
49 39. Nunn J, Erdogan M, Green RS. The prevalence of alcohol-related trauma recidivism: A  
50 systematic review. *Injury* 2016;47(3):551-8. doi: 10.1016/j.injury.2016.01.008  
51 [published Online First: 2016/02/03]  
52  
53 40. Stocchetti N, Zanier ER. Chronic impact of traumatic brain injury on outcome and quality  
54 of life: a narrative review. *Crit Care* 2016;20(1):148. doi: 10.1186/s13054-016-1318-  
55 1  
56  
57 41. Kim YJ. A systematic review of factors contributing to outcomes in patients with  
58 traumatic brain injury. *Journal of clinical nursing* 2011;20(11-12):1518-32. doi:  
59 10.1111/j.1365-2702.2010.03618.x [published Online First: 2011/04/02]  
60

- 1  
2  
3 42. King NS. A systematic review of age and gender factors in prolonged post-concussion  
4 symptoms after mild head injury. *Brain injury* 2014;28(13-14):1639-45. doi:  
5 10.3109/02699052.2014.954271 [published Online First: 2014/09/30]  
6  
7 43. Gould KR, Ponsford JL, Johnston L, et al. Relationship between psychiatric disorders and  
8 1-year psychosocial outcome following traumatic brain injury. *The Journal of head*  
9 *trauma rehabilitation* 2011;26(1):79-89. doi: 10.1097/HTR.0b013e3182036799  
10 [published Online First: 2011/01/07]  
11  
12 44. Donnell AJ, Kim MS, Silva MA, et al. Incidence of postconcussion symptoms in psychiatric  
13 diagnostic groups, mild traumatic brain injury, and comorbid conditions. *Clin*  
14 *Neuropsychol* 2012;26(7):1092-101. doi: 10.1080/13854046.2012.713984  
15  
16 45. Ponsford J, Cameron P, Fitzgerald M, et al. Predictors of postconcussive symptoms 3  
17 months after mild traumatic brain injury. *Neuropsychology* 2012;26(3):304-13. doi:  
18 10.1037/a0027888  
19  
20 46. Mercier E, Mitra B, Cameron PA. Challenges in assessment of the mild traumatic brain  
21 injured geriatric patient. *Injury* 2016;47(5):985-7. doi: 10.1016/j.injury.2016.04.001  
22 [published Online First: 2016/04/30]  
23  
24 47. Ramanathan DM, McWilliams N, Schatz P, et al. Epidemiological shifts in elderly  
25 traumatic brain injury: 18-year trends in Pennsylvania. *J Neurotrauma*  
26 2012;29(7):1371-8. doi: 10.1089/neu.2011.2197  
27  
28 48. Stocchetti N, Paterno R, Citerio G, et al. Traumatic brain injury in an aging population. *J*  
29 *Neurotrauma* 2012;29(6):1119-25. doi: 10.1089/neu.2011.1995 [published Online  
30 First: 2012/01/10]  
31  
32 49. Andriessen TM, Horn J, Franschman G, et al. Epidemiology, severity classification, and  
33 outcome of moderate and severe traumatic brain injury: a prospective multicenter  
34 study. *J Neurotrauma* 2011;28(10):2019-31. doi: 10.1089/neu.2011.2034 [published  
35 Online First: 2011/07/27]  
36  
37 50. Adams SD, Cotton BA, McGuire MF, et al. Unique pattern of complications in elderly  
38 trauma patients at a Level I trauma center. *J Trauma Acute Care Surg* 2012;72(1):112-  
39 8. doi: 10.1097/TA.0b013e318241f073  
40  
41 51. McIntyre A, Mehta S, Janzen S, et al. A meta-analysis of functional outcome among older  
42 adults with traumatic brain injury. *NeuroRehabilitation* 2013;32(2):409-14. doi:  
43 10.3233/nre-130862 [published Online First: 2013/03/29]  
44  
45 52. Calcagnile O, Holmen A, Chew M, et al. S100B levels are affected by older age but not by  
46 alcohol intoxication following mild traumatic brain injury. *Scandinavian journal of*  
47 *trauma, resuscitation and emergency medicine* 2013;21:52. doi: 10.1186/1757-7241-  
48 21-52 [published Online First: 2013/07/09]  
49  
50 53. Losoi H, Silverberg ND, Waljas M, et al. Recovery from Mild Traumatic Brain Injury in  
51 Previously Healthy Adults. *J Neurotrauma* 2016;33(8):766-76. doi:  
52 10.1089/neu.2015.4070 [published Online First: 2015/10/07]  
53  
54 54. Williams WH, Potter S, Ryland H. Mild traumatic brain injury and Postconcussion  
55 Syndrome: a neuropsychological perspective. *Journal of neurology, neurosurgery, and*  
56 *psychiatry* 2010;81(10):1116-22. doi: 10.1136/jnnp.2008.171298  
57  
58 55. Reuben A, Sampson P, Harris AR, et al. Postconcussion syndrome (PCS) in the emergency  
59 department: predicting and pre-empting persistent symptoms following a mild  
60 traumatic brain injury. *Emergency medicine journal : EMJ* 2014;31(1):72-7. doi:  
10.1136/emered-2012-201667 [published Online First: 2013/03/08]

- 1  
2  
3 56. Cassidy JD, Cancelliere C, Carroll LJ, et al. Systematic review of self-reported prognosis in  
4 adults after mild traumatic brain injury: results of the International Collaboration on  
5 Mild Traumatic Brain Injury Prognosis. *Archives of physical medicine and*  
6 *rehabilitation* 2014;95(3 Suppl):S132-51. doi: 10.1016/j.apmr.2013.08.299  
7  
8 57. Levin HS, Diaz-Arrastia RR. Diagnosis, prognosis, and clinical management of mild  
9 traumatic brain injury. *Lancet Neurol* 2015;14(5):506-17. doi: 10.1016/S1474-  
10 4422(15)00002-2  
11  
12 58. Ingebrigtsen T, Romner B, Kongstad P, et al. Increased serum concentrations of protein S-  
13 100 after minor head injury: a biochemical serum marker with prognostic value?  
14 *Journal of neurology, neurosurgery, and psychiatry* 1995;59(1):103-4. [published  
15 Online First: 1995/07/01]  
16  
17 59. Waterloo K, Ingebrigtsen T, Romner B. Neuropsychological function in patients with  
18 increased serum levels of protein S-100 after minor head injury. *Acta Neurochir*  
19 1997;139(1):26-31. doi: 10.1007/BF01850864  
20  
21 60. Ingebrigtsen T, Waterloo K, Jacobsen EA, et al. Traumatic brain damage in minor head  
22 injury: Relation of serum S-100 protein measurements to magnetic resonance  
23 imaging and neurobehavioral outcome. *Neurosurgery* 1999;45(3):468-75. doi:  
24 10.1097/00006123-199909000-00010  
25  
26 61. Ingebrigtsen T, Romner B, Marup-Jensen S, et al. The clinical value of serum S-100  
27 protein measurements in minor head injury: a Scandinavian multicentre study. *Brain*  
28 *injury* 2000;14(12):1047-55.  
29  
30 62. Herrmann M, Curio N, Jost S, et al. Release of biochemical markers of damage to neuronal  
31 and glial brain tissue is associated with short and long term neuropsychological  
32 outcome after traumatic brain injury. *Journal of Neurology, Neurosurgery & Psychiatry*  
33 2001;70(1):95-100. doi: 10.1136/jnnp.70.1.95  
34  
35 63. de Kruijk JR, Leffers P, Menheere PPCA, et al. Prediction of post-traumatic complaints  
36 after mild traumatic brain injury: Early symptoms and biochemical markers. *Journal*  
37 *of Neurology, Neurosurgery & Psychiatry* 2002;73(6):727-32. doi:  
38 10.1136/jnnp.73.6.727  
39  
40 64. Townend WJ, Guy MJ, Pani MA, et al. Head injury outcome prediction in the emergency  
41 department: A role for protein S-100B? *Journal of Neurology Neurosurgery and*  
42 *Psychiatry* 2002;73(5):542-46.  
43  
44 65. de Kruijk JR, Leffers P, Menheere PPC, et al. Olfactory function after mild traumatic brain  
45 injury. *Brain injury* 2003;17(1):73-78 6p.  
46  
47 66. Savola O, Hillbom M. Early predictors of post-concussion symptoms in patients with mild  
48 head injury. *Eur J Neurol* 2003;10(2):175-81. doi: 10.1046/j.1468-1331.2003.00552.x  
49  
50 67. Stranjalis G, Korfiatis S, Papapetrou C, et al. Elevated serum S-100B protein as a predictor  
51 of failure to short-term return to work or activities after mild head injury. *J*  
52 *Neurotrauma* 2004;21(8):1070-75. doi: 10.1089/0897715041651088  
53  
54 68. de Bousard CN, Lundin A, Karlstedt D, et al. S100 and cognitive impairment after mild  
55 traumatic brain injury. *Journal of Rehabilitation Medicine (Taylor & Francis Ltd)*  
56 2005;37(1):53-57 5p.  
57  
58 69. Stålnacke B, Björnstig U, Karlsson K, et al. One-year follow-up of mild traumatic brain  
59 injury: post-concussion symptoms, disabilities and life satisfaction in relation to  
60 serum levels of S-100B and neurone-specific enolase in acute phase. *Journal of*  
*Rehabilitation Medicine (Taylor & Francis Ltd)* 2005;37(5):300-05 6p.

- 1  
2  
3 70. Stapert S, de Kruijk J, Houx P, et al. S-100B concentration is not related to neurocognitive  
4 performance in the first month after mild traumatic brain injury. *Eur Neurol*  
5 2005;53(1):22-26. doi: 10.1159/000083678  
6  
7 71. Bazarian JJ, Zemlan FP, Mookerjee S, et al. Serum S-100B and cleaved-tau are poor  
8 predictors of long-term outcome after mild traumatic brain injury. *Brain injury*  
9 2006;20(7):759-65. doi: 10.1080/02699050500488207  
10  
11 72. Bazarian JJ, Beck C, Blyth B, et al. Impact of creatine kinase correction on the predictive  
12 value of S-100B after mild traumatic brain injury. *Restor Neurol Neurosci*  
13 2006;24(3):163-72.  
14  
15 73. Balut M, Koksall O, Dogan S, et al. Tau protein as a serum marker of brain damage in mild  
16 traumatic brain injury: preliminary results. *Advances in Therapy* 2006;23(1):12-22  
17 11p.  
18  
19 74. Naeimi ZS, Weinhofer A, Sarahrudi K, et al. Predictive value of S-100B protein and neuron  
20 specific-enolase as markers of traumatic brain damage in clinical use. *Brain injury*  
21 2006;20(5):463-68. doi: 10.1080/02699050600664418  
22  
23 75. Sojka P, Stalnacke BM, Bjornstig U, et al. One-year follow-up of patients with mild  
24 traumatic brain injury: Occurrence of post-traumatic stress-related symptoms at  
25 follow-up and serum levels of cortisol, S-100B and neuron-specific enolase in acute  
26 phase. *Brain injury* 2006;20(6):613-20. doi: 10.1080/02699050600676982  
27  
28 76. Jakola AS, Muller K, Larsen M, et al. Five-year outcome after mild head injury: a  
29 prospective controlled study. *Acta Neurol Scand* 2007;115(6):398-402. doi:  
30 10.1111/j.1600-0404.2007.00827.x  
31  
32 77. Stalnacke BM, Elgh E, Sojka P. One-year follow-up of mild traumatic brain injury:  
33 Cognition, disability and life satisfaction of patients seeking consultation. *J Rehabil*  
34 *Med* 2007;39(5):405-11. doi: 10.2340/16501977-0057  
35  
36 78. Lima DP, Simao Filho C, Abib Sde C, et al. Quality of life and neuropsychological changes  
37 in mild head trauma. Late analysis and correlation with S100B protein and cranial CT  
38 scan performed at hospital admission. *Injury* 2008;39(5):604-11. doi:  
39 10.1016/j.injury.2007.11.008 [published Online First: 2008/03/11]  
40  
41 79. Ma M, Lindsell CJ, Rosenberry CM, et al. Serum cleaved tau does not predict  
42 postconcussion syndrome after mild traumatic brain injury. *American Journal of*  
43 *Emergency Medicine* 2008;26(7):763-68 6p.  
44  
45 80. Schutze M, Kundt G, Buchholz K, et al. [Which factors are predictive for long-term  
46 complaints after mild traumatic brain injuries?]. *Versicherungsmedizin*  
47 2008;60(2):78-83.  
48  
49 81. Muller K, Ingebrigtsen T, Wilsgaard T, et al. Prediction of Time Trends in Recovery of  
50 Cognitive Function after Mild Head Injury. *Neurosurgery* 2009;64(4):698-704. doi:  
51 10.1227/01.NEU.0000340978.42892.78  
52  
53 82. Kleinert K, Schleich F, Biasca N, et al. Is there a Correlation between S100 beta and Post-  
54 Concussion Symptoms after Mild Traumatic Brain Injury? *Zentbl Chir*  
55 2010;135(3):277-78. doi: 10.1055/s-0028-1098766  
56  
57 83. Meric E, Gunduz A, Turedi S, et al. The prognostic value of neuron-specific enolase in  
58 head trauma patients. *The Journal of emergency medicine* 2010;38(3):297-301. doi:  
59 10.1016/j.jemermed.2007.11.032 [published Online First: 2008/05/24]  
60  
61 84. Topolovec-Vranic J, Pollmann-Mudryj MA, Ouchterlony D, et al. The Value of Serum  
62 Biomarkers in Prediction Models of Outcome After Mild Traumatic Brain Injury. *J*

- 1  
2  
3 *Trauma-Injury Infect Crit Care* 2011;71:S478-S86. doi:  
4 10.1097/TA.0b013e318232fa70
- 5 85. Metting Z, Wilczak N, Rodiger LA, et al. GFAP and S100B in the acute phase of mild  
6 traumatic brain injury. *Neurology* 2012;78(18):1428-33. doi:  
7 10.1212/WNL.0b013e318253d5c7
- 8 86. Okonkwo DO, Yue JK, Puccio AM, et al. GFAP-BDP as an acute diagnostic marker in  
9 traumatic brain injury: Results from the prospective transforming research and  
10 clinical knowledge in traumatic brain injury study. *J Neurotrauma* 2013;30(17):1490-  
11 97. doi: 10.1089/neu.2013.2883
- 12 87. Abbasi M, Sajjadi M, Fathi M, et al. Serum S100B protein as an outcome prediction tool in  
13 emergency department patients with traumatic brain injury. *Turkiye Acil Tıp Dergisi*  
14 2014;14(4):147-52.
- 15 88. Diaz-Arrastia R, Wang KK, Papa L, et al. Acute biomarkers of traumatic brain injury:  
16 relationship between plasma levels of ubiquitin C-terminal hydrolase-L1 and glial  
17 fibrillary acidic protein. *J Neurotrauma* 2014;31(1):19-25. doi:  
18 10.1089/neu.2013.3040 [published Online First: 2013/07/20]
- 19 89. Ryb GE, Dischinger PC, Auman KM, et al. S-100 beta does not predict outcome after mild  
20 traumatic brain injury. *Brain injury* 2014;28(11):1430-35. doi:  
21 10.3109/02699052.2014.919525
- 22 90. Heidari K, Asadollahi S, Jamshidian M, et al. Prediction of neuropsychological outcome  
23 after mild traumatic brain injury using clinical parameters, serum S100B protein and  
24 findings on computed tomography. *Brain injury* 2015;29(1):33-40. doi:  
25 10.3109/02699052.2014.948068
- 26 91. Dey S, Shukla D. To Study the Acute Phase Serum Biomarkers in Patients with Mild  
27 Traumatic Brain Injury (Mtbi) and Correlate with Short Term Cognitive Deficits. *J*  
28 *Neurotrauma* 2016;33(3):A8-A8.
- 29 92. Yang T, Song J, Bu X, et al. Elevated serum miR-93, miR-191, and miR-499 are  
30 noninvasive biomarkers for the presence and progression of traumatic brain injury. *J*  
31 *Neurochem* 2016;137(1):122-9. doi: 10.1111/jnc.13534
- 32  
33  
34  
35  
36  
37  
38  
39  
40  
41  
42  
43  
44  
45  
46  
47  
48  
49  
50  
51  
52  
53  
54  
55  
56  
57  
58  
59  
60

1  
2  
3  
4  
5  
6  
7  
8  
9  
10  
11  
12  
13  
14  
15  
16  
17  
18  
19  
20  
21  
22  
23  
24  
25  
26  
27  
28  
29  
30  
31  
32  
33  
34  
35  
36  
37  
38  
39  
40  
41  
42  
43  
44  
45  
46  
47  
48  
49  
50  
51  
52  
53  
54  
55  
56  
57  
58  
59  
60

**Figure legend**

Figure 1. PRISMA flow diagram of included studies

**Supplementary files legend**

**eFigure 1.** Age of patients enrolled in the included studies

**eTable 1.** Search strategy for the Excerpta Medica dataBASE (EMBASE)

**eTable 2.** List of congresses and conferences screened

**eTable 3.** PRISMA Checklist

For peer review only



Figure 1. PRISMA flow diagram of included studies

112x119mm (300 x 300 DPI)



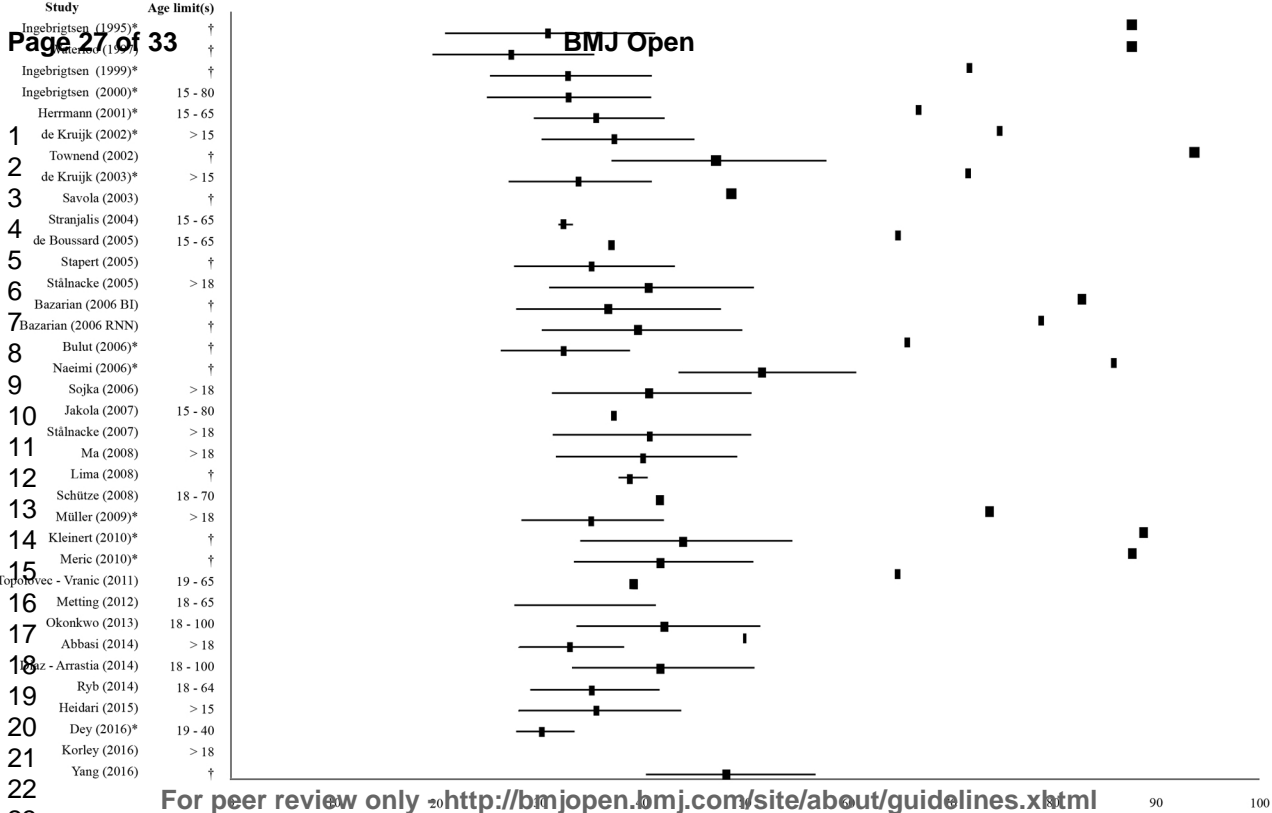

For peer review only <http://bmjopen.bmj.com/site/about/guidelines.xhtml>

Mean age with standard deviation followed by age of the oldest patient in each study

† None specified

\* Mean age and standard deviation were estimated using formulas in Hozo et al.



**eTable 1.** Search strategy for the Excerpta Medica dataBASE (EMBASE)

| <b>EMBASE SEARCH STRATEGY</b> |                                                                                                                                                                                                                                             |
|-------------------------------|---------------------------------------------------------------------------------------------------------------------------------------------------------------------------------------------------------------------------------------------|
|                               | <b>Traumatic brain injury</b>                                                                                                                                                                                                               |
| 1                             | 1. ( ('brain injury':ti,ab OR 'brain injuries':ti,ab OR 'brain injured':ti,ab OR 'brain injure':ti,ab OR 'brain injures':ti,ab OR 'brain trauma':ti,ab OR 'brain traumas':ti,ab OR 'brain traumatic':ti,ab OR brain:ti,ab OR brain:ti,ab OR |
| 2                             |                                                                                                                                                                                                                                             |
| 3                             |                                                                                                                                                                                                                                             |
| 4                             |                                                                                                                                                                                                                                             |
| 5                             |                                                                                                                                                                                                                                             |
| 6                             |                                                                                                                                                                                                                                             |
| 7                             |                                                                                                                                                                                                                                             |
| 8                             |                                                                                                                                                                                                                                             |
| 9                             |                                                                                                                                                                                                                                             |
| 10                            |                                                                                                                                                                                                                                             |
| 11                            | 'mild traumatic brain injury':ti,ab OR 'mild traumatic brain injure':ti,ab OR 'mild traumatic brain injured':ti,ab                                                                                                                          |
| 12                            | OR 'mild traumatic brain injures':ti,ab OR 'mild traumatic brain injuries':ti,ab OR 'minor traumatic brain                                                                                                                                  |
| 13                            | injury':ti,ab OR 'minor traumatic brain injure':ti,ab OR 'minor traumatic brain injured':ti,ab OR 'minor traumatic                                                                                                                          |
| 14                            | brain injures':ti,ab OR 'minor traumatic brain injuries':ti,ab OR 'minimal traumatic brain injury':ti,ab OR 'minimal                                                                                                                        |
| 15                            | traumatic brain injure':ti,ab OR 'minimal traumatic brain injured':ti,ab OR 'minimal traumatic brain injures':ti,ab                                                                                                                         |
| 16                            | OR 'minimal traumatic brain injuries':ti,ab OR mtbi:ti,ab OR 'minor head trauma':ti,ab OR 'minor head                                                                                                                                       |
| 17                            | traumas':ti,ab OR 'minor head traumatic':ti,ab OR 'minimal head trauma':ti,ab OR 'minimal head traumas':ti,ab                                                                                                                               |
| 18                            | OR 'minimal head traumatic':ti,ab OR concussion*:ti,ab OR 'brain concussion'/exp OR 'brain concussions'/exp                                                                                                                                 |
| 19                            | OR contusions:ti,ab OR contusions/exp OR 'brain contusion'/exp OR                                                                                                                                                                           |
| 20                            |                                                                                                                                                                                                                                             |
| 21                            | 'brains injury':ti,ab OR 'brains injuries':ti,ab OR 'brains injured':ti,ab OR 'brains injure':ti,ab OR 'brains                                                                                                                              |
| 22                            | injures':ti,ab OR 'brains trauma':ti,ab OR 'brains traumas':ti,ab OR 'brains traumatic':ti,ab OR brains:ti,ab OR                                                                                                                            |
| 23                            | brains:ti,ab OR                                                                                                                                                                                                                             |
| 24                            |                                                                                                                                                                                                                                             |
| 25                            | 'brainstem injury':ti,ab OR 'brainstem injuries':ti,ab OR 'brainstem injured':ti,ab OR 'brainstem injure':ti,ab OR                                                                                                                          |
| 26                            | 'brainstem injures':ti,ab OR 'brainstem trauma':ti,ab OR 'brainstem traumas':ti,ab OR 'brainstem traumatic':ti,ab                                                                                                                           |
| 27                            | OR brainstem:ti,ab OR brainstem:ti,ab OR                                                                                                                                                                                                    |
| 28                            |                                                                                                                                                                                                                                             |
| 29                            | 'head injury':ti,ab OR 'head injuries':ti,ab OR 'head injured':ti,ab OR 'head injure':ti,ab OR 'head injures':ti,ab                                                                                                                         |
| 30                            | OR 'head trauma':ti,ab OR 'head traumas':ti,ab OR 'head traumatic':ti,ab OR head:ti,ab OR head/exp OR                                                                                                                                       |
| 31                            |                                                                                                                                                                                                                                             |
| 32                            | heads:ti,ab OR 'heads injuries':ti,ab OR 'heads injured':ti,ab OR 'heads injure':ti,ab OR 'heads injures':ti,ab OR                                                                                                                          |
| 33                            | 'heads trauma':ti,ab OR 'heads traumas':ti,ab OR 'heads traumatic':ti,ab OR 'heads':ti,ab OR heads:ti,ab OR                                                                                                                                 |
| 34                            |                                                                                                                                                                                                                                             |
| 35                            | 'Brain edema'/exp OR 'Brain edema':ti,ab OR 'Brain swelling':ti,ab OR 'cerebral edema':ti,ab OR 'intracranial                                                                                                                               |
| 36                            | edema':ti,ab OR 'Hematoma'/exp OR Hematoma:ti,ab OR Haematoma:ti,ab OR 'brain hematoma'/exp OR                                                                                                                                              |
| 37                            | 'Hemorrhage'/exp OR Hemorrhage:ti,ab OR Haemorrhage:ti,ab OR 'subarachnoid hemorrhage'/exp OR 'brain                                                                                                                                        |
| 38                            | hemorrhage'/exp OR 'brain ventricle hemorrhage'/exp OR                                                                                                                                                                                      |
| 39                            |                                                                                                                                                                                                                                             |
| 40                            | 'craniocerebral injury':ti,ab OR 'craniocerebral injuries':ti,ab OR 'craniocerebral injured':ti,ab OR 'craniocerebral                                                                                                                       |
| 41                            | injure':ti,ab OR 'craniocerebral injures':ti,ab OR 'craniocerebral trauma':ti,ab OR 'craniocerebral traumas':ti,ab                                                                                                                          |
| 42                            | OR 'craniocerebral traumatic':ti,ab OR craniocerebral:ti,ab OR craniocerebral*:ti,ab OR                                                                                                                                                     |
| 43                            |                                                                                                                                                                                                                                             |
| 44                            | 'intracranial injury':ti,ab OR 'intracranial injuries':ti,ab OR 'intracranial injured':ti,ab OR 'intracranial injure':ti,ab                                                                                                                 |
| 45                            | OR 'intracranial injures':ti,ab OR 'intracranial trauma':ti,ab OR 'intracranial traumas':ti,ab OR 'intracranial                                                                                                                             |
| 46                            | traumatic':ti,ab OR intracranial:ti,ab OR intracrani*:ti,ab OR                                                                                                                                                                              |
| 47                            |                                                                                                                                                                                                                                             |
| 48                            | 'intra-cranial injury':ti,ab OR 'intra-cranial injuries':ti,ab OR 'intra-cranial injured':ti,ab OR 'intra-cranial                                                                                                                           |
| 49                            | injure':ti,ab OR 'intra-cranial injures':ti,ab OR 'intra-cranial trauma':ti,ab OR 'intra-cranial traumas':ti,ab OR                                                                                                                          |
| 50                            | 'intra-cranial traumatic':ti,ab OR 'intra-cranial':ti,ab OR 'intra-crani':ti,ab OR                                                                                                                                                          |
| 51                            |                                                                                                                                                                                                                                             |
| 52                            | 'intercranial injury':ti,ab OR 'intercranial injuries':ti,ab OR 'intercranial injured':ti,ab OR 'intercranial injure':ti,ab                                                                                                                 |
| 53                            | OR 'intercranial injures':ti,ab OR 'intercranial trauma':ti,ab OR 'intercranial traumas':ti,ab OR 'intercranial                                                                                                                             |
| 54                            | traumatic':ti,ab OR intercranial:ti,ab OR intercrani*:ti,ab OR                                                                                                                                                                              |
| 55                            |                                                                                                                                                                                                                                             |
| 56                            | 'inter cranial injury':ti,ab OR 'inter-cranial injuries':ti,ab OR 'inter-cranial injured':ti,ab OR 'inter-cranial                                                                                                                           |
| 57                            | injure':ti,ab OR 'inter-cranial injures':ti,ab OR 'inter-cranial trauma':ti,ab OR 'inter-cranial traumas':ti,ab OR                                                                                                                          |
| 58                            | 'inter-cranial traumatic':ti,ab OR 'inter-cranial':ti,ab OR                                                                                                                                                                                 |
| 59                            |                                                                                                                                                                                                                                             |
| 60                            |                                                                                                                                                                                                                                             |

1  
2  
3  
4  
5  
6  
7  
8  
9  
10  
11  
12  
13  
14  
15  
16  
17  
18  
19  
20  
21  
22  
23  
24  
25  
26  
27  
28  
29  
30  
31  
32  
33  
34  
35  
36  
37  
38  
39  
40  
41  
42  
43  
44  
45  
46  
47  
48  
49  
50  
51  
52  
53  
54  
55  
56  
57  
58  
59  
60

'cerebral injury':ti,ab OR 'cerebral injuries':ti,ab OR 'cerebral injured':ti,ab OR 'cerebral injure':ti,ab OR 'cerebral injures':ti,ab OR 'cerebral trauma':ti,ab OR 'cerebral traumas':ti,ab OR 'cerebral traumatic':ti,ab OR cerebral:ti,ab OR cerebr\*:ti,ab OR

'cerebellum injury':ti,ab OR 'cerebellum injuries':ti,ab OR 'cerebellum injured':ti,ab OR 'cerebellum injure':ti,ab OR 'cerebellum injures':ti,ab OR 'cerebellum trauma':ti,ab OR 'cerebellum traumas':ti,ab OR 'cerebellum traumatic':ti,ab OR cerebellum:ti,ab OR cerebel\*:ti,ab OR

'forebrain injury':ti,ab OR 'forebrain injuries':ti,ab OR 'forebrain injured':ti,ab OR 'forebrain injure':ti,ab OR 'forebrain injures':ti,ab OR 'forebrain trauma':ti,ab OR 'forebrain traumas':ti,ab OR 'forebrain traumatic':ti,ab OR forebrain:ti,ab OR forebrain\*:ti,ab) AND

(injury\*:ti,ab OR injuries:ti,ab OR injured:ti,ab OR injure:ti,ab OR injures:ti,ab OR trauma:ti,ab OR traumas:ti,ab OR traumatic\*:ti,ab OR traumato\*:ti,ab OR damag\*:ti,ab)) OR

TBI:ti,ab OR Glasgow coma scale:ti,ab OR GCS:ti,ab OR 'traumatic brain injury':ti,ab OR 'traumatic brain injury':ti,ab OR 'traumatic brain injured':ti,ab OR 'traumatic brain injures':ti,ab OR 'traumatic brain injuries':ti,ab OR

'Head injury'/de OR 'brain injury'/de OR 'brain hemorrhage'/de OR 'diffuse axonal injury'/de OR 'coma'/de OR 'brain hemorrhage'/de OR 'Glasgow coma scale'/de OR

'blast injury'/exp OR 'blast-induced brain injury'/exp OR 'Blast exposition':ti,ab OR 'blast injuries':ti,ab OR 'blast injury':ti,ab OR 'blast injure':ti,ab OR 'blast injured':ti,ab OR 'sports-related concussion':ti,ab OR 'sport-related concussion':ti,ab OR SRC:ti,ab

## **Biomarkers**

2. biomarker\*:ab,ti OR 'biomarker'/exp OR 'biologic marker':ab,ti OR 'biologic markers':ab,ti OR 'biological marker':ab,ti OR 'biological markers':ab,ti OR 'biochemical marker':ab,ti OR 'biochemical markers':ab,ti OR 'laboratory marker':ab,ti OR 'laboratory markers':ab,ti OR 'immunological marker':ab,ti OR 'immunological markers':ab,ti OR 'immune marker':ab,ti OR 'immune markers':ab,ti OR 'serum marker':ab,ti OR 'serum markers':ab,ti OR 'clinical marker':ab,ti OR 'clinical markers':ab,ti OR 'surrogate end point':ab,ti OR 'surrogate end points':ab,ti OR 'surrogate endpoint':ab,ti OR 'surrogate endpoints':ab,ti OR

'neuronal protein'/exp OR 'neuronal proteins':ti,ab OR 'neuronal protein':ti,ab OR 'neuronal marker':ti,ab OR 'neuronal markers':ti,ab OR 'nerve tissue protein':ti,ab OR 'nerve tissue proteins':ti,ab OR 'nerve protein'/exp OR 'nerve proteins':ti,ab OR 'neuronal calcium sensor'/exp OR 'neuron specific nuclear protein'/exp OR

'astrocyte protein':ti,ab OR 'astrocyte protein'/exp OR

'S-100':ti,ab OR S100\*:ti,ab OR 'S100B':ti,ab OR 'S-100B':ti,ab OR 'S100BB':ti,ab OR 'S-100BB':ti,ab OR 'S-100B protein':ti,ab OR 'S100-β':ti,ab OR 'S100β':ti,ab OR 'protein S100B'/exp OR

GFAP:ti,ab OR 'GFAP'/exp OR 'glial protein':ti,ab OR 'glial proteins':ti,ab OR 'glial fibrillary acidic protein':ti,ab OR 'glial fibrillary acidic proteins':ti,ab OR 'glial intermediate filament protein':ti,ab OR 'glial intermediate filament proteins':ti,ab OR astroprotein\*:ti,ab OR 'GFA-protein':ti,ab OR 'GFA-proteins':ti,ab OR 'Glial Fibrillary Acidic Protein'/exp OR

'neuron specific enolase'/exp OR 'Neuron specific nuclear protein'/exp OR NSE:ti,ab OR NSE/exp OR 'neuron specific enolase':ti,ab OR 'neuron-specific enolase':ti,ab OR 'gamma-enolase':ti,ab OR 'nervous system specific enolase':ti,ab OR 'phosphopyruvate hydratase':ti,ab OR 'Phosphopyruvate Hydratase':ti,ab OR 'enolase'/exp OR

'C-tau':ti,ab OR 'C-tau' OR 'cleaved-tau':ti,ab OR 'tau protein':ti,ab OR 'tau Proteins':ti,ab OR 'tau protein'/exp OR

'UCH-L1':ti,ab OR UCHL1:ti,ab OR 'ubiquitin carboxyl-terminal hydrolase 1-1':ti,ab OR 'ubiquitin c-terminal

hydrolase':ti,ab OR 'ubiquitin carboxy terminal esterase':ti,ab OR 'ubiquitin thiolesterase':ti,ab OR 'ubiquitin'/exp OR 'ubiquitin protein ligase'/exp OR 'ubiquitin thiolesterase'/exp OR

SBDP:ti,ab OR SBDP150:ti,ab OR SBDP145:ti,ab OR SBDP120:ti,ab OR 'SBDP'/exp OR 'Spectrin'/exp OR 'fodrin'/exp OR 'spectrin breakdown product'/exp OR

'NF-H':ti,ab OR NFH:ti,ab OR 'NFP-200':ti,ab OR NFP200:ti,ab OR 'hyperphosphorylated neurofilament':ti,ab OR 'neurofilament protein':ti,ab OR 'neurofilament proteins':ti,ab OR 'neurofilament H protein':ti,ab OR 'neurofilament H proteins':ti,ab OR 'neurofilament triplet protein':ti,ab OR 'neurofilament triplet proteins':ti,ab OR 'neurofilament M protein'/exp OR 'neurofilament'/exp OR

'microRNA'/exp OR 'MicroRNAs'/exp OR

'BDNF':ti,ab OR 'BDNF'/exp OR 'brain derived neurotrophic factor'/exp OR 'brain derived neurotrophic factor receptor'

### **Outcomes (post-concussion symptoms related terms)**

3. 'post-concussion syndrome'/exp OR 'post-concussion syndrome':ti,ab OR 'postconcussion':ti,ab OR 'post-concussion symptom':ti,ab OR 'postconcussion symptoms':ti,ab OR 'postconcussion syndrom':ti,ab OR 'postconcussion syndrom':ti,ab OR 'post-concussive symptom':ti,ab OR 'postconcussive symptom':ti,ab OR 'postconcussive syndrom':ti,ab OR 'post-concussive syndrom':ti,ab OR 'post-concussion recovery':ti,ab OR 'postconcussion recovery':ti,ab OR 'postconcussion recovery':ti,ab OR 'post-traumatic symptom':ti,ab OR 'posttraumatic symptom':ti,ab OR 'post traumatic symptom':ti,ab OR

'persistent':ti,ab OR 'persistent concussive syndrome':ti,ab OR 'postconcussion syndrome'/exp OR 'postconcussion syndrome':ti,ab OR 'long term':ti,ab OR 'permanent':ti,ab OR 'prolonged':ti,ab OR 'late recovery':ti,ab OR 'recovery':ti,ab OR 'poor outcome':ti,ab OR 'outcome':ti,ab OR 'disability'/exp OR 'disability':ti,ab OR 'sick leave':ti,ab OR 'medical leave'/exp OR 'glasgow outcome scale'/exp OR 'glasgow outcome scale':ti,ab OR 'assessment':ti,ab OR 'patient outcome assessment':ti,ab OR 'outcome assessment'/exp OR 'outcome assessment':ti,ab OR 'symptom assessment'/exp OR 'symptom assessment':ti,ab OR

'neurologic symptom':ti,ab OR 'neurologic symptoms':ti,ab OR 'neurologic manifestation':ti,ab OR 'Neurologic Manifestations':ti,ab OR 'neurological problem':ti,ab OR 'neurological problems':ti,ab OR

'neurologic disease':ti,ab OR 'cognitive symptom':ti,ab OR 'cognitive symptoms':ti,ab OR 'mild cognitive impairment':ti,ab OR 'cognitive impairment':ti,ab OR 'cognitive defect':ti,ab OR 'cognition':ti,ab OR 'Neurobehavioral manifestations':ti,ab OR 'neuropsychological symptom':ti,ab OR 'neuropsychological symptoms':ti,ab OR 'behavioral symptom':ti,ab OR 'behavioral symptoms':ti,ab OR 'behavioural symptom':ti,ab OR 'behavioural symptoms':ti,ab OR

'rivermead post-concussion symptoms questionnaire':ti,ab OR 'rivermead post-concussion questionnaire':ti,ab OR 'rivermead post concussion symptoms questionnaire':ti,ab OR 'rivermead post concussion questionnaire':ti,ab OR

'prognosis'/exp OR 'prognosis':ti,ab OR 'predictive value'/exp OR 'predictive value':ti,ab OR 'predictive values':ti,ab OR 'predictive validity'/exp OR 'predictive validity':ti,ab OR 'clinical course'/exp OR 'clinical course':ti,ab OR 'disease course'/exp OR 'disease course':ti,ab OR 'incidence':ti,ab OR 'mortality':ti,ab OR

'Quality of life'/exp OR 'quality of life':ti,ab OR 'quality of life assessment'/exp OR 'quality of working life'/exp OR 'return to work'/exp OR 'return to work' OR

'follow up'/exp OR 'follow up studies':ti,ab OR 'follow up study':ti,ab OR 'follow-up studies':ti,ab OR 'follow-up study':ti,ab OR 'comparative study'/exp OR 'comparative study':ti,ab OR 'cohort studies':ti,ab OR 'cohort study':ti,ab OR 'cohort analysis'/exp OR 'cohort analysis':ti,ab OR 'longitudinal study'/exp OR 'longitudinal study':ti,ab OR 'longitudinal studies':ti,ab OR 'randomized controlled trial'/exp OR 'randomized controlled trial':ti,ab OR 'controlled clinical trial'/exp OR 'controlled clinical trial':ti,ab OR 'clinical trial'/exp OR 'clinical trial':ti,ab OR

1  
2  
3  
4  
5  
6  
7  
8  
9  
10  
11  
12  
13  
14  
15  
16  
17  
18  
19  
20  
21  
22  
23  
24  
25  
26  
27  
28  
29  
30  
31  
32  
33  
34  
35  
36  
37  
38  
39  
40  
41  
42  
43  
44  
45  
46  
47  
48  
49  
50  
51  
52  
53  
54  
55  
56  
57  
58  
59  
60

headache/exp OR 'headache':ti,ab OR 'Posttraumatic headache'/exp OR 'posttraumatic headache':ti,ab OR 'primary headache'/exp OR 'secondary headache'/exp OR 'dizziness'/exp OR 'dizziness':ti,ab OR 'vertigo'/exp OR 'vertigo':ti,ab OR 'nausea'/exp OR 'nausea':ti,ab OR 'nausea and vomiting'/exp OR 'nausea and vomiting':ti,ab OR 'vomiting'/exp OR 'vomiting':ti,ab OR 'hyperacusis':ti,ab OR 'loudness recruitment'/exp OR 'loudness recruitment':ti,ab OR 'noise sensitivity':ti,ab OR 'sleep disturbance':ti,ab OR 'sleep disorder'/exp OR 'sleep disorder':ti,ab OR 'sleep arousal disorder'/exp OR 'sleep arousal disorder':ti,ab OR 'dysomnia':ti,ab OR 'insomnia':ti,ab OR fatigue/exp OR 'fatigue':ti,ab OR 'mental fatigue':ti,ab OR 'dysthymia'/exp OR 'dysthymia':ti,ab OR 'chronic fatigue syndrome'/exp OR 'chronic fatigue syndrome':ti,ab OR 'irritable mood':ti,ab OR 'irritable':ti,ab OR 'irritability'/exp OR 'annoyance':ti,ab OR 'impatience':ti,ab OR 'anger'/exp OR 'anger':ti,ab OR 'despresion'/exp OR 'depression':ti,ab OR 'depressive disorder':ti,ab OR 'long term depression'/exp OR 'long-term synaptic depression':ti,ab OR 'frustration'/exp OR 'frustration':ti,ab OR 'frustrated':ti,ab OR 'Impatient':ti,ab OR 'forgetfulness':ti,ab OR 'memory disorder'/exp OR 'memory disorder':ti,ab OR 'memory disorders':ti,ab OR 'poor memory':ti,ab OR 'information processing speed':ti,ab OR 'deceleration in information processing':ti,ab OR 'impede processing speed':ti,ab OR 'speed of processing':ti,ab OR 'processing speed':ti,ab OR 'speed of information processing':ti,ab OR 'information processing'/exp OR 'working memory'/exp OR 'working memory':ti,ab OR 'short term memory'/exp OR 'short term memory':ti,ab OR 'vision disorder':ti,ab OR 'vision disorders':ti,ab OR 'visual disorder'/exp OR 'visual disorder':ti,ab OR 'visual impairment'/exp OR 'visual impairment':ti,ab OR 'visual impairments':ti,ab OR 'vision disability':ti,ab OR 'vision disabilities':ti,ab OR 'blurred vision'/exp OR 'blurred vision':ti,ab OR 'visual acuity'/exp OR 'visual acuity':ti,ab OR 'visual consequences':ti,ab OR 'visual deficit':ti,ab OR 'visual deficits':ti,ab OR 'vision loss':ti,ab OR 'visual function':ti,ab OR 'visual system function'/exp OR 'vision'/exp OR 'visual quality of life':ti,ab OR 'photophobia'/exp OR 'photophobia':ti,ab OR 'light sensitivity':ti,ab OR 'light sensitivities':ti,ab OR 'diplopia'/exp OR 'diplopia':ti,ab OR 'double vision':ti,ab OR 'Psychomotor agigation':ti,ab OR 'restlessness'/exp OR 'restlessness':ti,ab OR 'psychomotor hyperactivity':ti,ab OR 'psychomotor excitement':ti,ab OR 'Anxiety'/exp OR 'Anxiety':ti,ab OR 'Anxieties':ti,ab OR 'Nervousness':ti,ab OR 'Hypervigilance':ti,ab OR 'Anxiety Assessment':ti,ab OR 'Anxiety Disorders':ti,ab OR 'Loss of concentration':ti,ab OR 'Loss of attention':ti,ab OR 'Drowsiness':ti,ab

**Finalization**

4. #1 AND #2 AND #3

**eTable 2.** List of congresses and conferences screened

- 1) American Academy of Emergency Medicine (AAEM)
- 2) American Academy of Neurology (AAN)
- 3) American Association of Neurological Surgeons (AANS)
- 4) American Association for the Surgery of Trauma (AAST)
- 5) American College of Emergency Physicians (ACEP)
- 6) Australasian College for Emergency Medicine (ACEM)
- 7) American College of Sports Medicine (ACSM)
- 8) American Medical Society for Sports Medicine (AMSSM)
- 9) American Neurological Association (ANA)
- 10) Australian and New Zealand Association of Neurologists (ANZAN)
- 11) Canadian Association of Emergency Physicians (CAEP)
- 12) Congress of Neurological Surgeons (CNS)
- 13) European Neurological Society (ENS)
- 14) International Brain Injury Association (IBIA)
- 15) International Symposium on Intensive Care and Emergency Medicine (ISICEM)
- 16) Society for Academic Emergency Medicine (SAEM)
- 17) Société de Neuropsychologie de Langue Française (SNLF)
- 18) World Congress on Brain Injury
- 19) World Congress of Neurology (WCN)

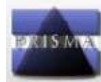

# PRISMA 2009 Checklist

| Section/topic                      | #  | Checklist item                                                                                                                                                                                                                                                                                              | Reported on page # |
|------------------------------------|----|-------------------------------------------------------------------------------------------------------------------------------------------------------------------------------------------------------------------------------------------------------------------------------------------------------------|--------------------|
| <b>TITLE</b>                       |    |                                                                                                                                                                                                                                                                                                             |                    |
| Title                              | 1  | Identify the report as a systematic review, meta-analysis, or both.                                                                                                                                                                                                                                         | 1                  |
| <b>ABSTRACT</b>                    |    |                                                                                                                                                                                                                                                                                                             |                    |
| Structured summary                 | 2  | Provide a structured summary including, as applicable: background; objectives; data sources; study eligibility criteria, participants, and interventions; study appraisal and synthesis methods; results; limitations; conclusions and implications of key findings; systematic review registration number. | 3                  |
| <b>INTRODUCTION</b>                |    |                                                                                                                                                                                                                                                                                                             |                    |
| Rationale                          | 3  | Describe the rationale for the review in the context of what is already known.                                                                                                                                                                                                                              | 4                  |
| Objectives                         | 4  | Provide an explicit statement of questions being addressed with reference to participants, interventions, comparisons, outcomes, and study design (PICOS).                                                                                                                                                  | 4                  |
| <b>METHODS</b>                     |    |                                                                                                                                                                                                                                                                                                             |                    |
| Protocol and registration          | 5  | Indicate if a review protocol exists, if and where it can be accessed (e.g., Web address), and, if available, provide registration information including registration number.                                                                                                                               | 5                  |
| Eligibility criteria               | 6  | Specify study characteristics (e.g., PICOS, length of follow-up) and report characteristics (e.g., years considered, language, publication status) used as criteria for eligibility, giving rationale.                                                                                                      | 5                  |
| Information sources                | 7  | Describe all information sources (e.g., databases with dates of coverage, contact with study authors to identify additional studies) in the search and date last searched.                                                                                                                                  | 5                  |
| Search                             | 8  | Present full electronic search strategy for at least one database, including any limits used, such that it could be repeated.                                                                                                                                                                               | 5 – eTable 1       |
| Study selection                    | 9  | State the process for selecting studies (i.e., screening, eligibility, included in systematic review, and, if applicable, included in the meta-analysis).                                                                                                                                                   | 5                  |
| Data collection process            | 10 | Describe method of data extraction from reports (e.g., piloted forms, independently, in duplicate) and any processes for obtaining and confirming data from investigators.                                                                                                                                  | 5-6                |
| Data items                         | 11 | List and define all variables for which data were sought (e.g., PICOS, funding sources) and any assumptions and simplifications made.                                                                                                                                                                       | 5-6                |
| Risk of bias in individual studies | 12 | Describe methods used for assessing risk of bias of individual studies (including specification of whether this was done at the study or outcome level), and how this information is to be used in any data synthesis.                                                                                      | 6                  |
| Summary measures                   | 13 | State the principal summary measures (e.g., risk ratio, difference in means).                                                                                                                                                                                                                               | 6                  |
| Synthesis of results               | 14 | Describe the methods of handling data and combining results of studies, if done, including measures of consistency (e.g., I <sup>2</sup> ) for each meta-analysis.                                                                                                                                          | 6                  |

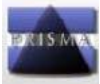

# PRISMA 2009 Checklist

Page 1 of 2

| Section/topic                 | #  | Checklist item                                                                                                                                                                                           | Reported on page # |
|-------------------------------|----|----------------------------------------------------------------------------------------------------------------------------------------------------------------------------------------------------------|--------------------|
| Risk of bias across studies   | 15 | Specify any assessment of risk of bias that may affect the cumulative evidence (e.g., publication bias, selective reporting within studies).                                                             | —                  |
| Additional analyses           | 16 | Describe methods of additional analyses (e.g., sensitivity or subgroup analyses, meta-regression), if done, indicating which were pre-specified.                                                         | —                  |
| <b>RESULTS</b>                |    |                                                                                                                                                                                                          |                    |
| Study selection               | 17 | Give numbers of studies screened, assessed for eligibility, and included in the review, with reasons for exclusions at each stage, ideally with a flow diagram.                                          | 6                  |
| Study characteristics         | 18 | For each study, present characteristics for which data were extracted (e.g., study size, PICOS, follow-up period) and provide the citations.                                                             | 6                  |
| Risk of bias within studies   | 19 | Present data on risk of bias of each study and, if available, any outcome level assessment (see item 12).                                                                                                | —                  |
| Results of individual studies | 20 | For all outcomes considered (benefits or harms), present, for each study: (a) simple summary data for each intervention group (b) effect estimates and confidence intervals, ideally with a forest plot. | 6-7                |
| Synthesis of results          | 21 | Present results of each meta-analysis done, including confidence intervals and measures of consistency.                                                                                                  | 6-7                |
| Risk of bias across studies   | 22 | Present results of any assessment of risk of bias across studies (see Item 15).                                                                                                                          | —                  |
| Additional analysis           | 23 | Give results of additional analyses, if done (e.g., sensitivity or subgroup analyses, meta-regression [see Item 16]).                                                                                    | —                  |
| <b>DISCUSSION</b>             |    |                                                                                                                                                                                                          |                    |
| Summary of evidence           | 24 | Summarize the main findings including the strength of evidence for each main outcome; consider their relevance to key groups (e.g., healthcare providers, users, and policy makers).                     | 7                  |
| Limitations                   | 25 | Discuss limitations at study and outcome level (e.g., risk of bias), and at review-level (e.g., incomplete retrieval of identified research, reporting bias).                                            | 9                  |
| Conclusions                   | 26 | Provide a general interpretation of the results in the context of other evidence, and implications for future research.                                                                                  | 9                  |
| <b>FUNDING</b>                |    |                                                                                                                                                                                                          |                    |
| Funding                       | 27 | Describe sources of funding for the systematic review and other support (e.g., supply of data); role of funders for the systematic review.                                                               | 10                 |

From: Moher D, Liberati A, Tetzlaff J, Altman DG, The PRISMA Group (2009). Preferred Reporting Items for Systematic Reviews and Meta-Analyses: The PRISMA Statement. PLoS Med 6(7): e1000097. doi:10.1371/journal.pmed1000097

For more information, visit: [www.prisma-statement.org](http://www.prisma-statement.org).

Page 2 of 2

For peer review only - <http://bmjopen.bmj.com/site/about/guidelines.xhtml>
