# Supplementary material for: Characteristics of patients included and enrolled in studies on the prognostic value of serum biomarkers for prediction of postconcussion symptoms following a mild traumatic brain injury: a systematic review
Source: PubMed Central journal article supplement — BMJ Open. 2017 Sep 27;7(9):e017848. doi: 10.1136/bmjopen-2017-017848 (PMC5623519; doi:10.1136/bmjopen-2017-017848), 2017-09-27
Supplement: bmjopen-2017-017848supp002.pdf [file bmjopen-2017-017848supp002.pdf]

**eTable 2.** List of congresses and conferences screened

- 1) American Academy of Emergency Medicine (AAEM)
- 2) American Academy of Neurology (AAN)
- 3) American Association of Neurological Surgeons (AANS)
- 4) American Association for the Surgery of Trauma (AAST)
- 5) American College of Emergency Physicians (ACEP)
- 6) Australasian College for Emergency Medicine (ACEM)
- 7) American College of Sports Medicine (ACSM)
- 8) American Medical Society for Sports Medicine (AMSSM)
- 9) American Neurological Association (ANA)
- 10) Australian and New Zealand Association of Neurologists (ANZAN)
- 11) Canadian Association of Emergency Physicians (CAEP)
- 12) Congress of Neurological Surgeons (CNS)
- 13) European Neurological Society (ENS)
- 14) International Brain Injury Association (IBIA)
- 15) International Symposium on Intensive Care and Emergency Medicine (ISICEM)
- 16) Society for Academic Emergency Medicine (SAEM)
- 17) Société de Neuropsychologie de Langue Française (SNLF)
- 18) World Congress on Brain Injury
- 19) World Congress of Neurology (WCN)
